# Supplementary material for: Dammarane-type triterpenoids as 11β-HSD1 inhibitors from Homonoia riparia
Source: Royal Society of Chemistry journal article supplement (doi:10.1039/c4ob00807c), 2014-01-01

Electronic supplementary information for

## **Dammarane-type Triterpenoids as 11 $\beta$ -HSD1 Inhibitors from *Homonoia riparia***

Jin-Hai Yu, Yu Shen, Hong-Bing Liu, Ying Leng, Hua-Zhang\* and Jian-Min Yue\*

*State Key Laboratory of Drug Research, Shanghai Institute of Materia Medica, Chinese Academy of Sciences, 555 Zu Chong Zhi Road, Zhangjiang Hi-Tech Park, Shanghai 201203, P. R. China.*

*E-mails: h.zhang@simm.ac.cn; jmyue@simm.ac.cn; Fax: +86-21-50807088; Tel: +86-21-50806718*

**Table S1.** Preliminary assay results of tested compounds against human 11 $\beta$ -HSD1 at 10  $\mu$ M.

**Table S2.** Preliminary assay results of tested compounds against mouse 11 $\beta$ -HSD1 at 10  $\mu$ M.

**Table S3.** X-ray crystallographic data for horipenoid E (**5**).

**Figure S1.**  $^1\text{H}$  NMR spectrum of horipenoid A (**1**) in  $\text{C}_5\text{D}_5\text{N}$

**Figure S2.**  $^{13}\text{C}$  NMR spectrum of horipenoid A (**1**) in  $\text{C}_5\text{D}_5\text{N}$

**Figure S3.**  $^1\text{H}$ - $^1\text{H}$  COSY spectrum of horipenoid A (**1**) in  $\text{C}_5\text{D}_5\text{N}$

**Figure S4.** HSQC spectrum of horipenoid A (**1**) in  $\text{C}_5\text{D}_5\text{N}$

**Figure S5.** HMBC spectrum of horipenoid A (**1**) in  $\text{C}_5\text{D}_5\text{N}$

**Figure S6.** ROESY spectrum of horipenoid A (**1**) in  $\text{C}_5\text{D}_5\text{N}$

**Figure S7.** ESI(+)-MS spectrum of horipenoid A (**1**)

**Figure S8.** HRESI(-)-MS spectrum of horipenoid A (**1**)

**Figure S9.** IR spectrum of horipenoid A (**1**)

**Figure S10.**  $^1\text{H}$  NMR spectrum of horipenoid B (**2**) in  $\text{CD}_3\text{OD}$

**Figure S11.**  $^{13}\text{C}$  NMR spectrum of horipenoid B (**2**) in  $\text{CD}_3\text{OD}$

**Figure S12.** HSQC spectrum of horipenoid B (**2**) in  $\text{CD}_3\text{OD}$

**Figure S13.** HMBC spectrum of horipenoid B (**2**) in  $\text{CD}_3\text{OD}$

**Figure S14.** ROESY spectrum of horipenoid B (**2**) in  $\text{CD}_3\text{OD}$

**Figure S15.** EIMS spectrum of horipenoid B (**2**)

**Figure S16.** HREIMS spectrum of horipenoid B (**2**)

**Figure S17.** IR spectrum of horipenoid B (**2**)

**Figure S18.**  $^1\text{H}$  NMR spectrum of horipenoid C (**3**) in  $\text{CDCl}_3$

**Figure S19.**  $^{13}\text{C}$  NMR spectrum of horipenoid C (**3**) in  $\text{CDCl}_3$

**Figure S20.**  $^1\text{H}$ - $^1\text{H}$  COSY spectrum of horipenoid C (**3**) in  $\text{CDCl}_3$

**Figure S21.** HSQC spectrum of horipenoid C (**3**) in  $\text{CDCl}_3$

**Figure S22.** HMBC spectrum of horipenoid C (**3**) in  $\text{CDCl}_3$

**Figure S23.** ROESY spectrum of horipenoid C (**3**) in  $\text{CDCl}_3$

**Figure S24.** ESI(+)-MS spectrum of horipenoid C (**3**)

**Figure S25.** ESI(-)MS spectrum of horipenoid C (**3**)

**Figure S26.** HRESI(-)MS spectrum of horipenoid C (**3**)

**Figure S27.** IR spectrum of horipenoid A (**3**)

**Figure S28.** <sup>1</sup>H NMR spectrum of horipenoid D (**4**) in CDCl<sub>3</sub>

**Figure S29.** <sup>13</sup>C NMR spectrum of horipenoid D (**4**) in CDCl<sub>3</sub>

**Figure S30.** HSQC spectrum of horipenoid D (**4**) in CDCl<sub>3</sub>

**Figure S31.** HMBC spectrum of horipenoid D (**4**) in CDCl<sub>3</sub>

**Figure S32.** ESI(+)MS spectrum of horipenoid D (**4**)

**Figure S33.** HRESI(-)MS spectrum of horipenoid D (**4**)

**Figure S34.** IR spectrum of horipenoid D (**4**)

**Figure S35.** <sup>1</sup>H NMR spectrum of horipenoid E (**5**) in C<sub>5</sub>D<sub>5</sub>N

**Figure S36.** <sup>13</sup>C NMR spectrum of horipenoid E (**5**) in C<sub>5</sub>D<sub>5</sub>N

**Figure S37.** <sup>1</sup>H-<sup>1</sup>H COSY spectrum of horipenoid E (**5**) in C<sub>5</sub>D<sub>5</sub>N

**Figure S38.** HSQC spectrum of horipenoid E (**5**) in C<sub>5</sub>D<sub>5</sub>N

**Figure S39.** HMBC spectrum of horipenoid E (**5**) in C<sub>5</sub>D<sub>5</sub>N

**Figure S40.** ROESY spectrum of horipenoid E (**5**) in C<sub>5</sub>D<sub>5</sub>N

**Figure S41.** ESI(+)MS spectrum of horipenoid E (**5**)

**Figure S42.** ESI(-)MS spectrum of horipenoid E (**5**)

**Figure S43.** HRESI(-)MS spectrum of horipenoid E (**5**)

**Figure S44.** IR spectrum of horipenoid E (**5**)

**Figure S45.** <sup>1</sup>H NMR spectrum of horipenoid F (**6**) in C<sub>5</sub>D<sub>5</sub>N

**Figure S46.** <sup>13</sup>C NMR spectrum of horipenoid F (**6**) in C<sub>5</sub>D<sub>5</sub>N

**Figure S47.** HSQC spectrum of horipenoid F (**6**) in C<sub>5</sub>D<sub>5</sub>N

**Figure S48.** HMBC spectrum of horipenoid F (**6**) in C<sub>5</sub>D<sub>5</sub>N

**Figure S49.** ROESY spectrum of horipenoid F (**6**) in C<sub>5</sub>D<sub>5</sub>N

**Figure S50.** ESI(+)MS spectrum of horipenoid F (**6**)

**Figure S51.** ESI(-)MS spectrum of horipenoid F (**6**)

**Figure S52.** HRESI(-)MS spectrum of horipenoid F (**6**)

**Figure S53.** IR spectrum of horipenoid F (**6**)

**Figure S54.** <sup>1</sup>H NMR spectrum of horipenoid G (**7**) in C<sub>5</sub>D<sub>5</sub>N

**Figure S55.** <sup>13</sup>C NMR spectrum of horipenoid G (**7**) in C<sub>5</sub>D<sub>5</sub>N

**Figure S56.** HSQC spectrum of horipenoid G (**7**) in C<sub>5</sub>D<sub>5</sub>N

**Figure S57.** HMBC spectrum of horipenoid G (**7**) in C<sub>5</sub>D<sub>5</sub>N

**Figure S58.** ROESY spectrum of horipenoid G (**7**) in C<sub>5</sub>D<sub>5</sub>N

**Figure S59.** ESI(+)MS spectrum of horipenoid G (**7**)

**Figure S60.** ESI(-)MS spectrum of horipenoid G (**7**)

**Figure S61.** HRESI(-)MS spectrum of horipenoid G (**7**)

**Figure S62.** IR spectrum of horipenoid G (**7**)

**Figure S63.** <sup>1</sup>H NMR spectrum of horipenoid H (**8**) in C<sub>5</sub>D<sub>5</sub>N

**Figure S64.**  $^{13}\text{C}$  NMR spectrum of horipenoid H (**8**) in  $\text{C}_5\text{D}_5\text{N}$

**Figure S65.** HSQC spectrum of horipenoid H (**8**) in  $\text{C}_5\text{D}_5\text{N}$

**Figure S66.** HMBC spectrum of horipenoid H (**8**) in  $\text{C}_5\text{D}_5\text{N}$

**Figure S67.** ROESY spectrum of horipenoid H (**8**) in  $\text{C}_5\text{D}_5\text{N}$

**Figure S68.** ESI(+)MS spectrum of horipenoid H (**8**)

**Figure S69.** ESI(-)MS spectrum of horipenoid H (**8**)

**Figure S70.** HRESI(-)MS spectrum of horipenoid H (**8**)

**Figure S71.** IR spectrum of horipenoid H (**8**)

**Table S1.** Preliminary assay results of tested compounds against human 11 $\beta$ -HSD1 at 10  $\mu$ M.

| <b>Compds no.</b>        | <b>Expt.1</b> | <b>Expt.2</b> | <b>Expt.3</b> | <b>Average</b> | <b>SD</b> |
|--------------------------|---------------|---------------|---------------|----------------|-----------|
| <b>1</b>                 | 61.07%        | 60.88%        | 57.17%        | 59.70%         | 2.20%     |
| <b>3</b>                 | 44.06%        | 45.04%        | 40.13%        | 43.08%         | 2.60%     |
| <b>4</b>                 | 59.28%        | 52.93%        | 58.92%        | 57.04%         | 3.57%     |
| <b>5</b>                 | 72.12%        | 74.49%        | 77.83%        | 74.81%         | 2.87%     |
| <b>6</b>                 | 75.86%        | 80.61%        | 72.67%        | 76.38%         | 4.00%     |
| <b>7</b>                 | 58.39%        | 55.57%        | 50.80%        | 54.92%         | 3.84%     |
| <b>8</b>                 | 71.06%        | 65.30%        | 67.13%        | 67.83%         | 2.94%     |
| <b>9</b>                 | 40.59%        | 37.70%        | 40.68%        | 39.66%         | 1.69%     |
| Glycyrrhetic acid 1 nM   | 14.83%        | 11.14%        | 11.62%        | 12.53%         | 2.00%     |
| Glycyrrhetic acid 10 nM  | 44.66%        | 45.00%        | 45.18%        | 44.94%         | 0.26%     |
| Glycyrrhetic acid 100 nM | 95.15%        | 99.83%        | 91.85%        | 95.61%         | 4.01%     |

**Table S2.** Preliminary assay results of tested compounds against mouse 11 $\beta$ -HSD1 at 10  $\mu$ M.

| <b>Compds no.</b>        | <b>Expt.1</b> | <b>Expt.2</b> | <b>Expt.3</b> | <b>Average</b> | <b>SD</b> |
|--------------------------|---------------|---------------|---------------|----------------|-----------|
| <b>1</b>                 | 33.05%        | 36.23%        | 30.55%        | 33.28%         | 2.85%     |
| <b>3</b>                 | 91.72%        | 85.55%        | 90.98%        | 89.42%         | 3.36%     |
| <b>4</b>                 | 64.36%        | 61.30%        | 53.63%        | 59.76%         | 5.53%     |
| <b>5</b>                 | 78.62%        | 89.05%        | 80.36%        | 82.68%         | 5.58%     |
| <b>6</b>                 | 77.18%        | 79.88%        | 71.84%        | 76.30%         | 4.09%     |
| <b>7</b>                 | 56.67%        | 57.78%        | 48.83%        | 54.43%         | 4.88%     |
| <b>8</b>                 | 70.88%        | 71.75%        | 65.67%        | 69.44%         | 3.29%     |
| <b>9</b>                 | 43.89%        | 43.26%        | 39.64%        | 42.26%         | 2.30%     |
| Glycyrrhetic acid 1 nM   | 16.88%        | 15.73%        | 19.69%        | 17.43%         | 2.04%     |
| Glycyrrhetic acid 10 nM  | 54.05%        | 55.13%        | 60.39%        | 56.53%         | 3.39%     |
| Glycyrrhetic acid 100 nM | 89.37%        | 90.45%        | 92.69%        | 90.83%         | 1.69%     |

**Table S3.** X-ray crystallographic data for horipenoid E (**5**).

---

|                                   |                                                                  |         |
|-----------------------------------|------------------------------------------------------------------|---------|
| Empirical formula                 | C <sub>30</sub> H <sub>52</sub> O <sub>4</sub> ·H <sub>2</sub> O |         |
| Formula weight                    | 494.73                                                           |         |
| Temperature                       | 296(2) K                                                         |         |
| Wavelength                        | 1.54178 Å                                                        |         |
| Crystal system                    | Orthorhombic                                                     |         |
| Space group                       | P 2(1)2(1)2(1)                                                   |         |
| Unit cell dimensions              | a = 10.5637(3) Å                                                 | α = 90° |
|                                   | b = 13.2734(3) Å                                                 | β = 90° |
|                                   | c = 20.6274(5) Å                                                 | γ = 90° |
| Volume                            | 2892.30(13) Å <sup>3</sup>                                       |         |
| Z                                 | 4                                                                |         |
| Density (calculated)              | 1.136 Mg/m <sup>3</sup>                                          |         |
| Absorption coefficient            | 0.588 mm <sup>-1</sup>                                           |         |
| F(000)                            | 1096                                                             |         |
| Crystal size                      | 0.300 × 0.200 × 0.150 mm <sup>3</sup>                            |         |
| Theta range for data collection   | 3.960 to 69.482°.                                                |         |
| Index ranges                      | -12 ≤ h ≤ 12, -16 ≤ k ≤ 15, -24 ≤ l ≤ 24                         |         |
| Reflections collected             | 21688                                                            |         |
| Independent reflections           | 5337 [R(int) = 0.0630]                                           |         |
| Completeness to theta = 67.679°   | 99.6 %                                                           |         |
| Absorption correction             | Semi-empirical from equivalents                                  |         |
| Max. and min. transmission        | 0.7532 and 0.4678                                                |         |
| Refinement method                 | Full-matrix least-squares on F <sup>2</sup>                      |         |
| Data / restraints / parameters    | 5337 / 0 / 328                                                   |         |
| Goodness-of-fit on F <sup>2</sup> | 1.037                                                            |         |
| Final R indices [I > 2σ(I)]       | R1 = 0.0606, wR2 = 0.1672                                        |         |
| R indices (all data)              | R1 = 0.0674, wR2 = 0.1746                                        |         |
| Absolute structure parameter      | -0.08(13)                                                        |         |
| Extinction coefficient            | n/a                                                              |         |
| Largest diff. peak and hole       | 0.415 and -0.215 e.Å <sup>-3</sup>                               |         |

---

<sup>a</sup> Colorless crystals of **5** were obtained in methanol with trace of water.

---

**Figure S1.**  $^1\text{H}$  NMR spectrum of horipenoid A (**1**) in  $\text{C}_5\text{D}_5\text{N}$

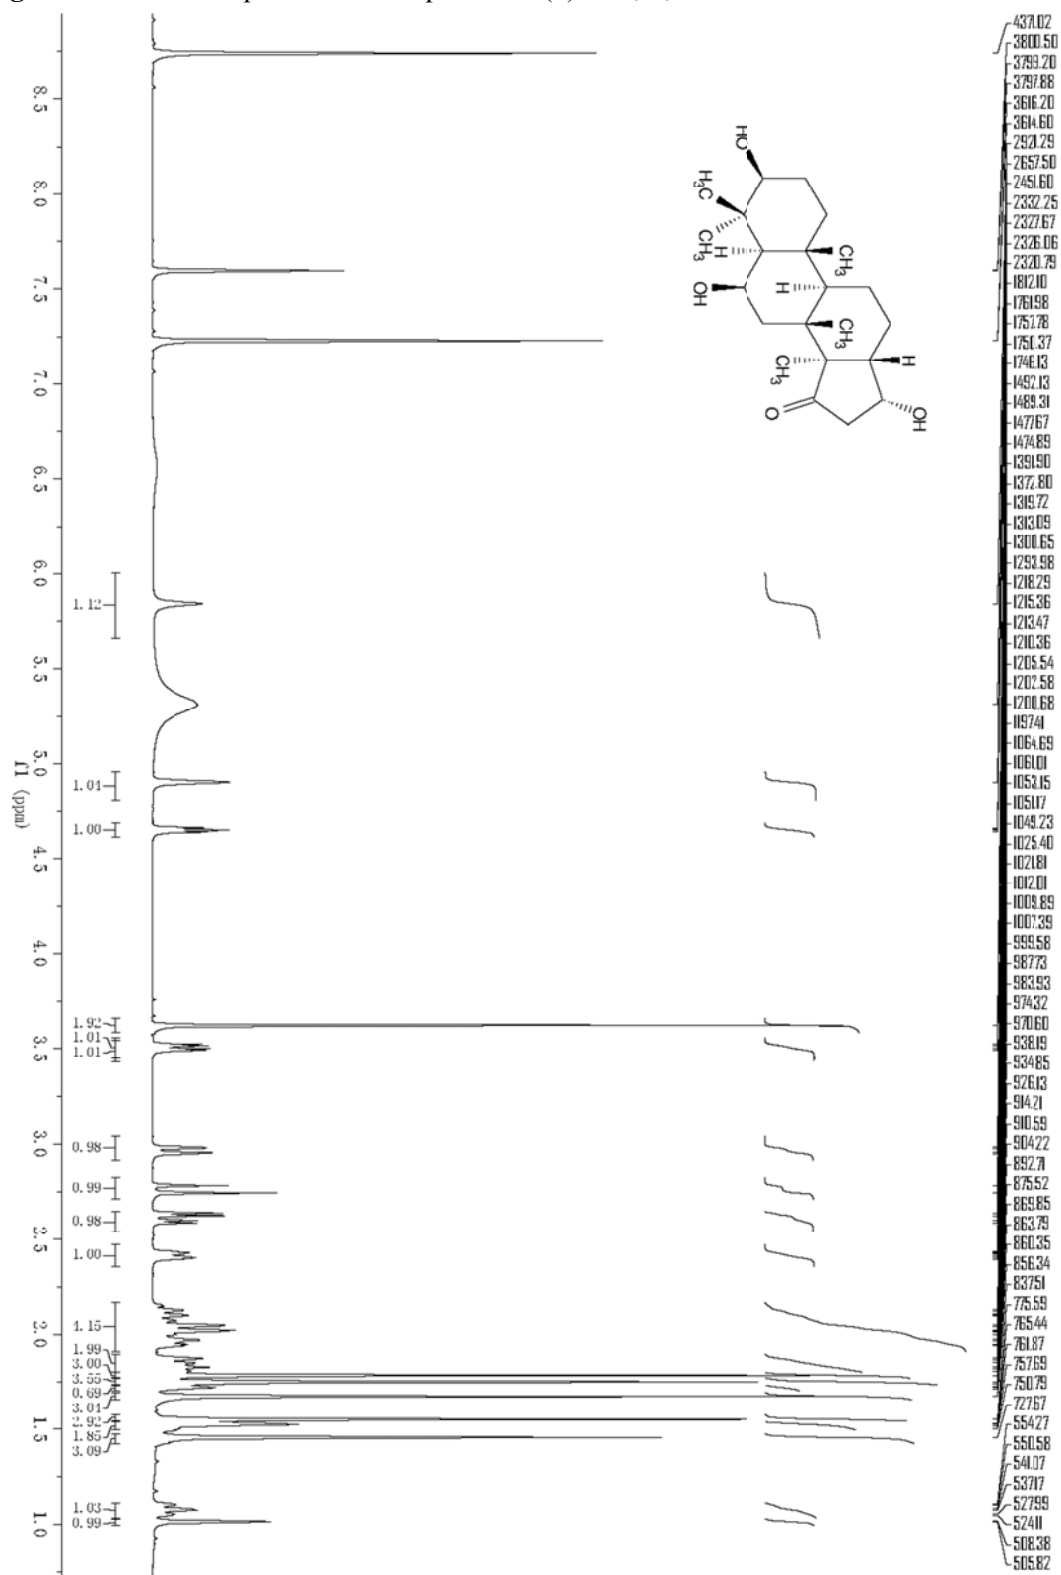

**Figure S2.**  $^{13}\text{C}$  NMR spectrum of horipenoid A (**1**) in  $\text{C}_5\text{D}_5\text{N}$

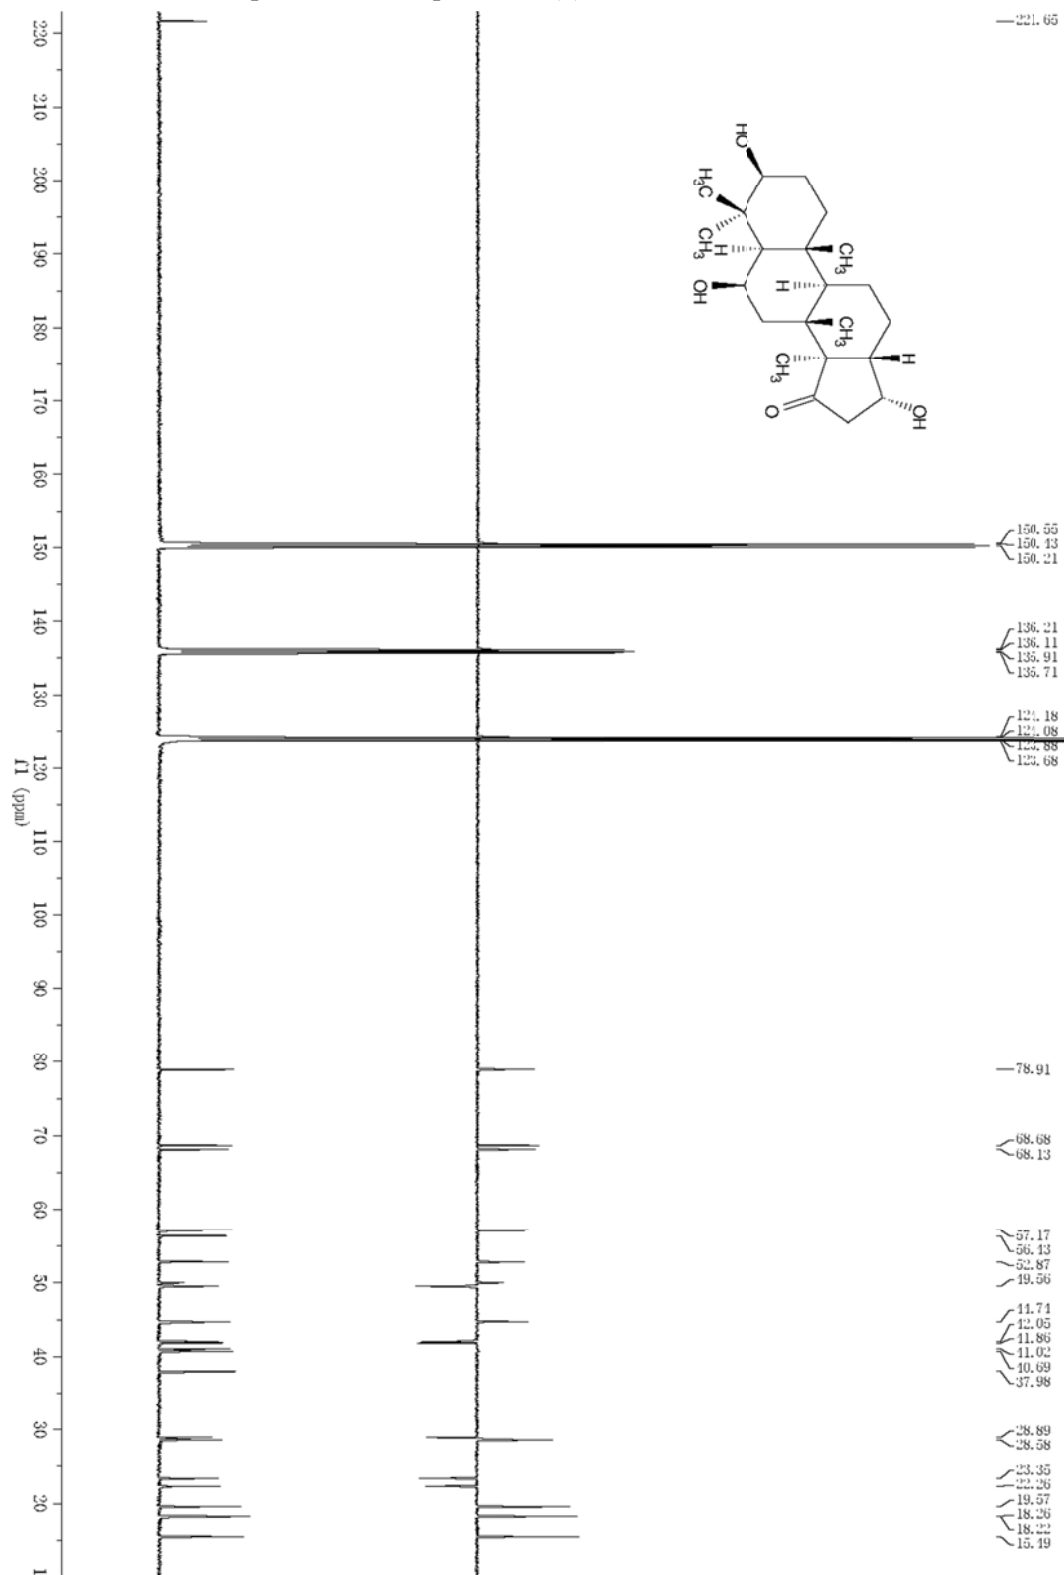

**Figure S3.**  $^1\text{H}$ - $^1\text{H}$  COSY spectrum of horipenoid A (**1**) in  $\text{C}_5\text{D}_5\text{N}$

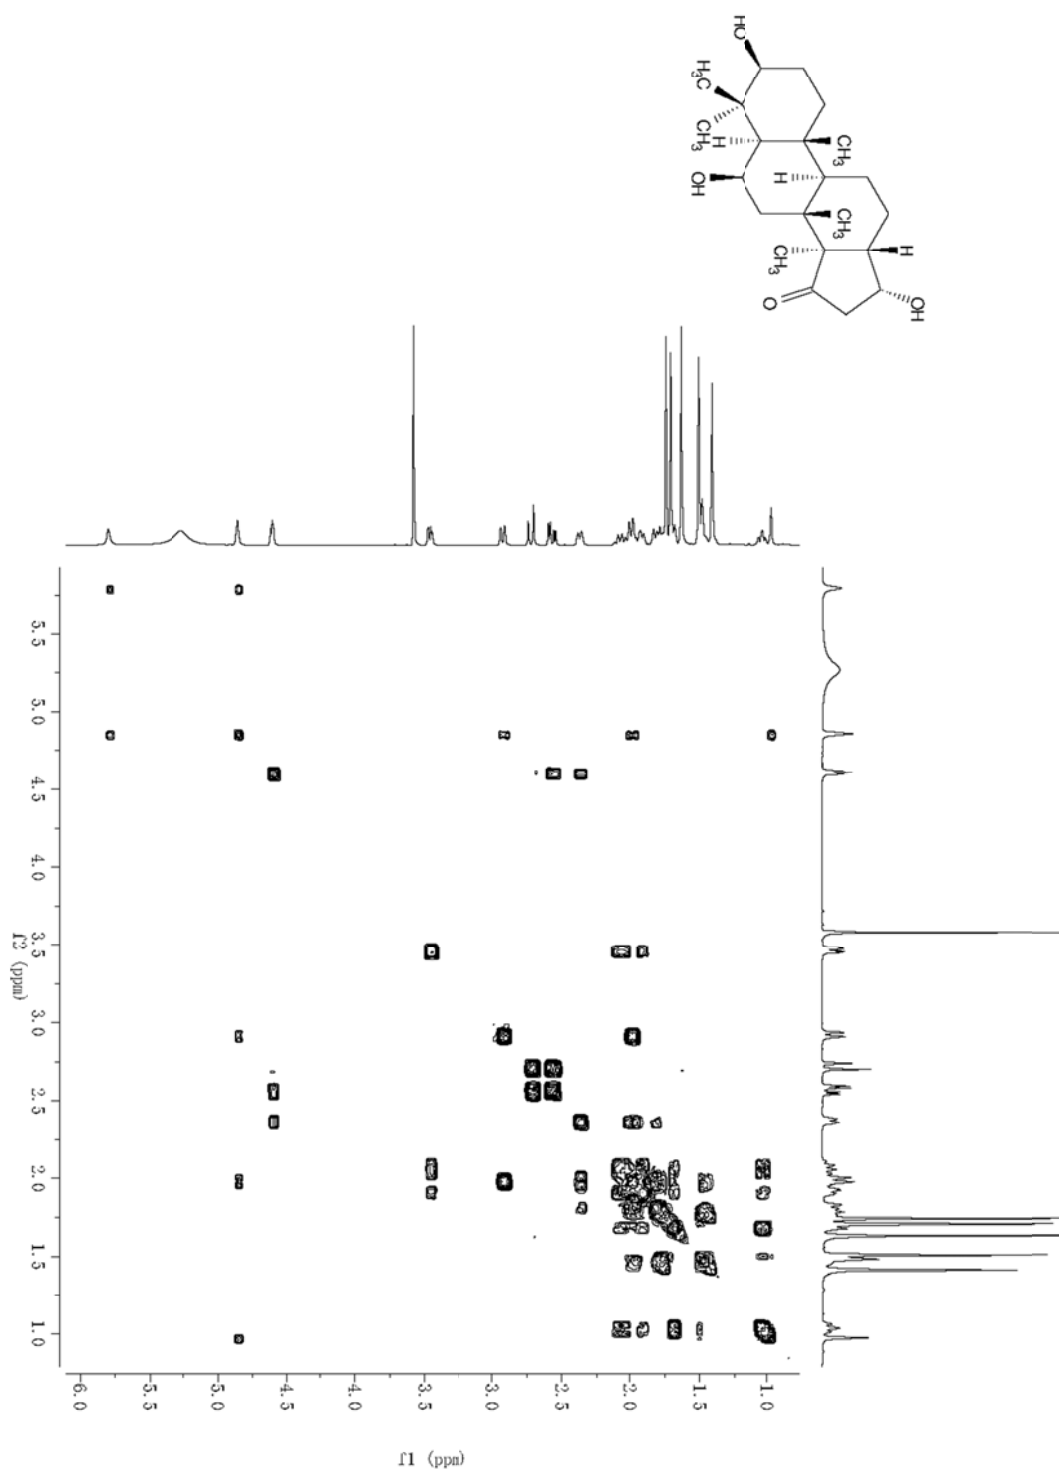



**Figure S4.** HSQC spectrum of horipenoid A (**1**) in  $C_5D_5N$

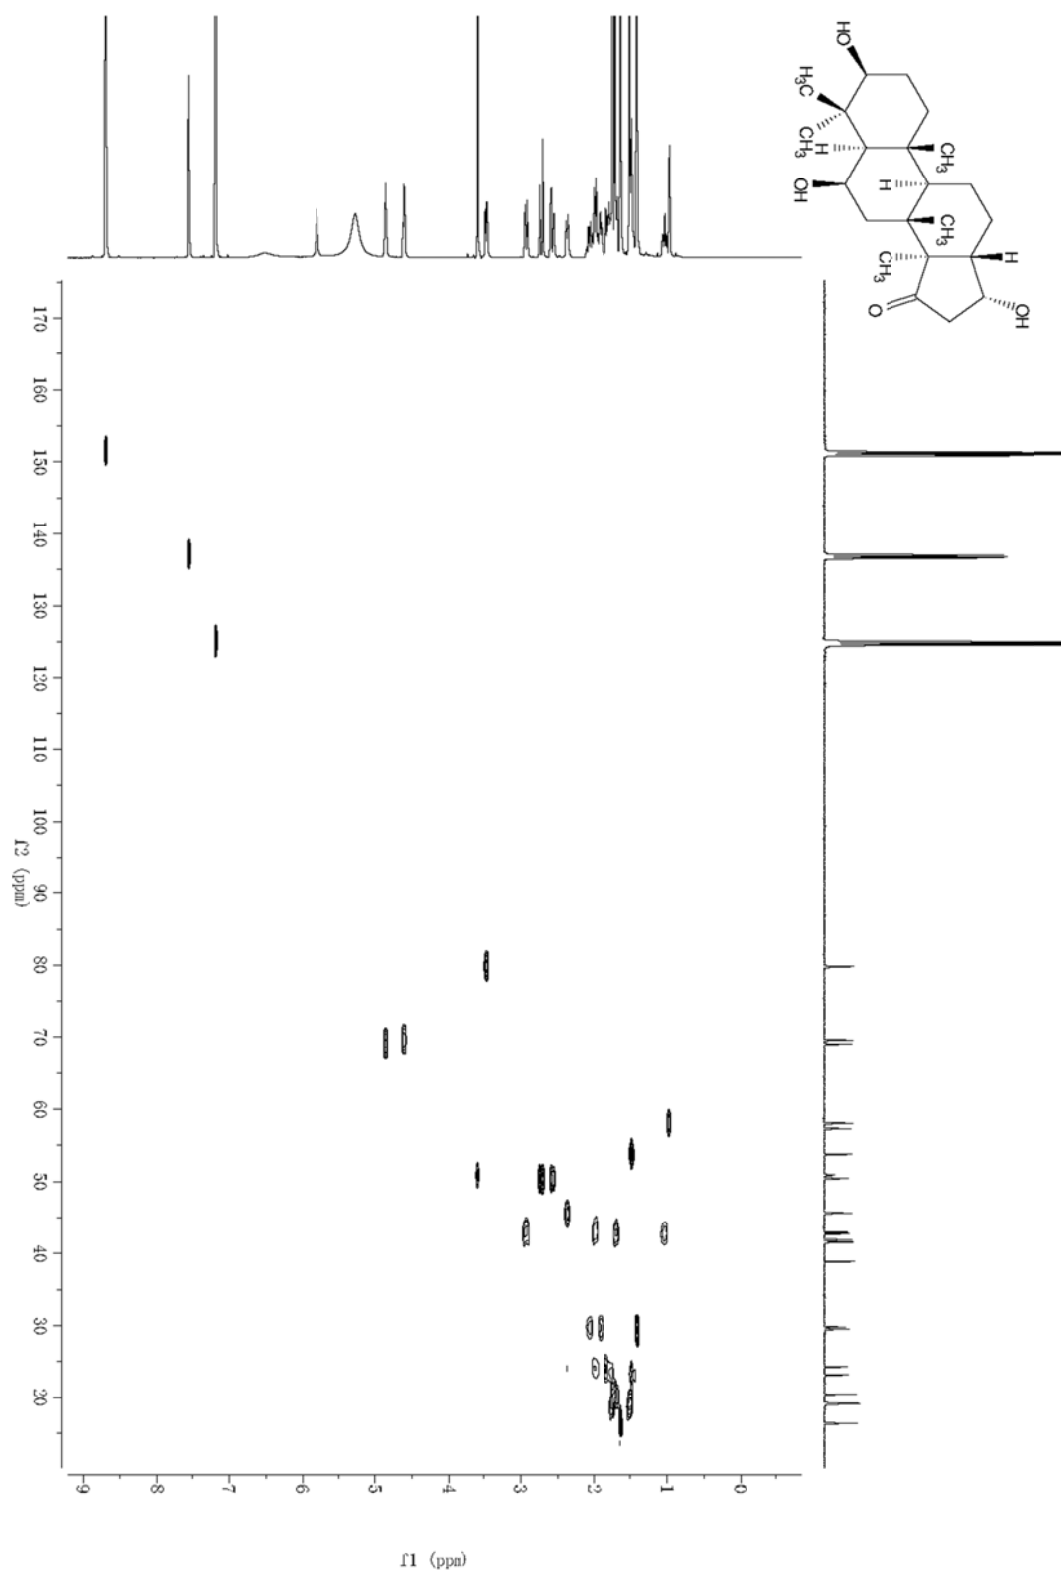

**Figure S5.** HMBC spectrum of horipenoid A (**1**) in C<sub>5</sub>D<sub>5</sub>N

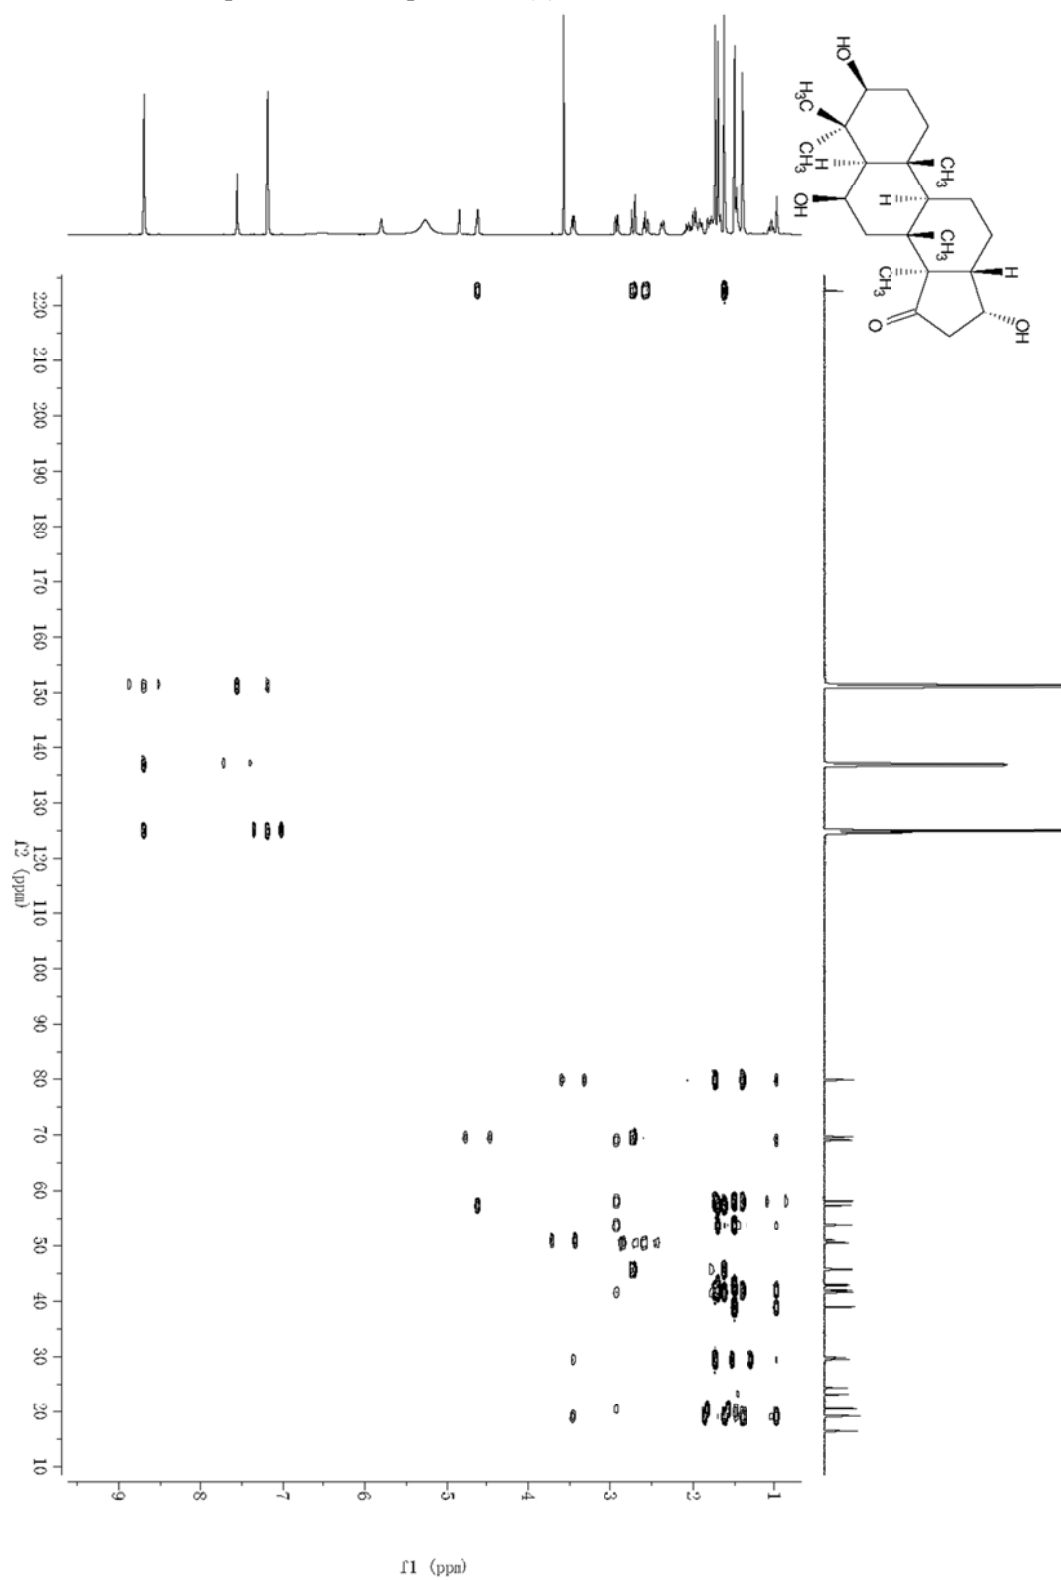

Figure S6. ROESY spectrum of horipenoid A (1) in C<sub>5</sub>D<sub>5</sub>N

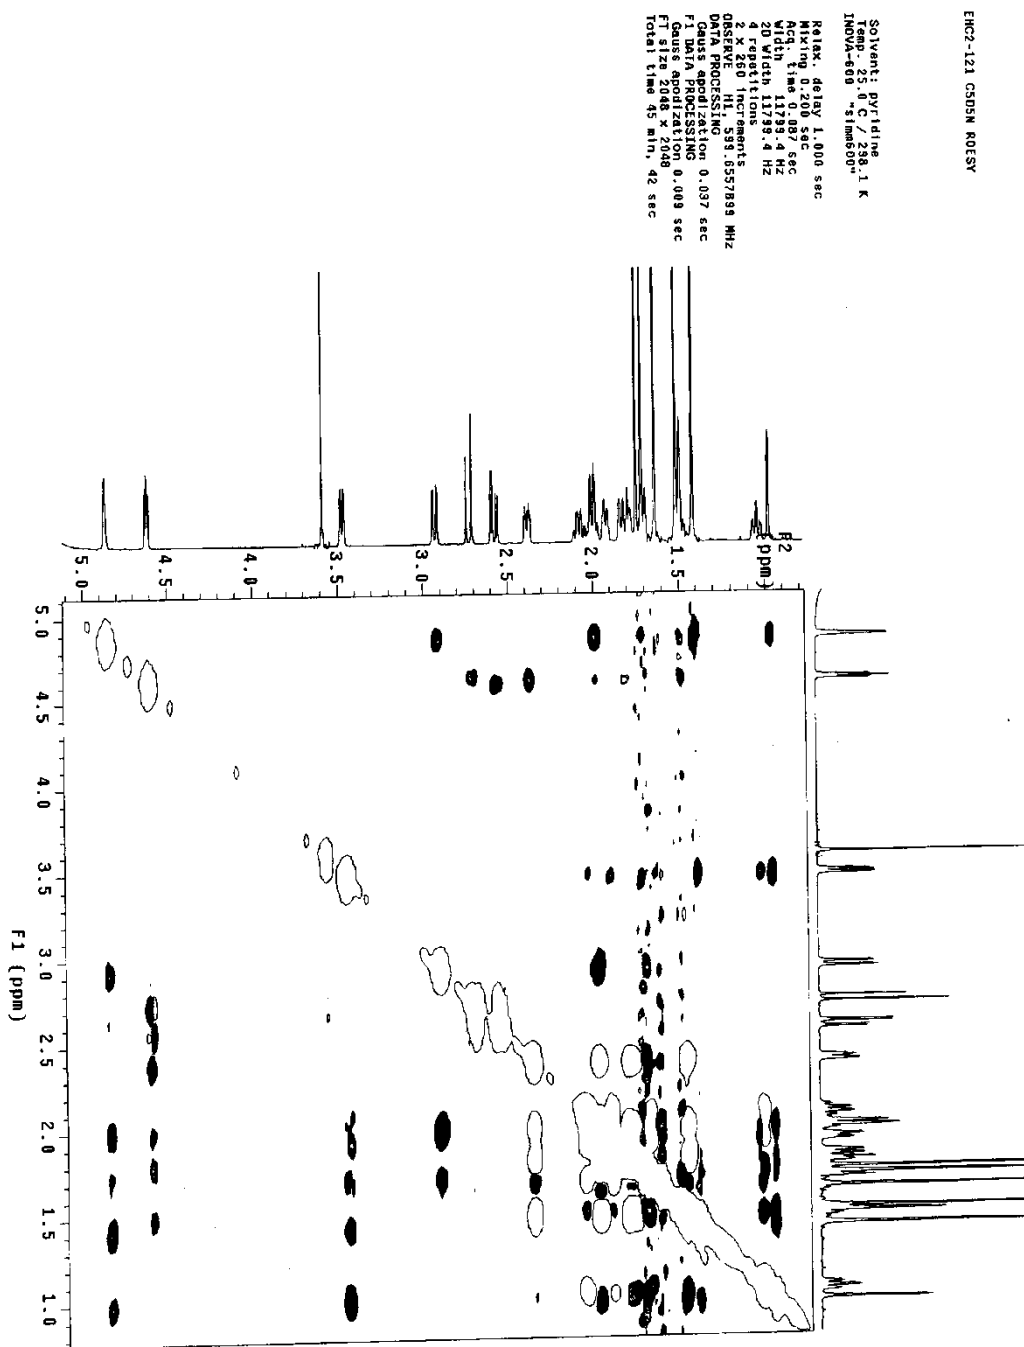

Figure S7. ESI(+)-MS spectrum of horipenoid A (1)

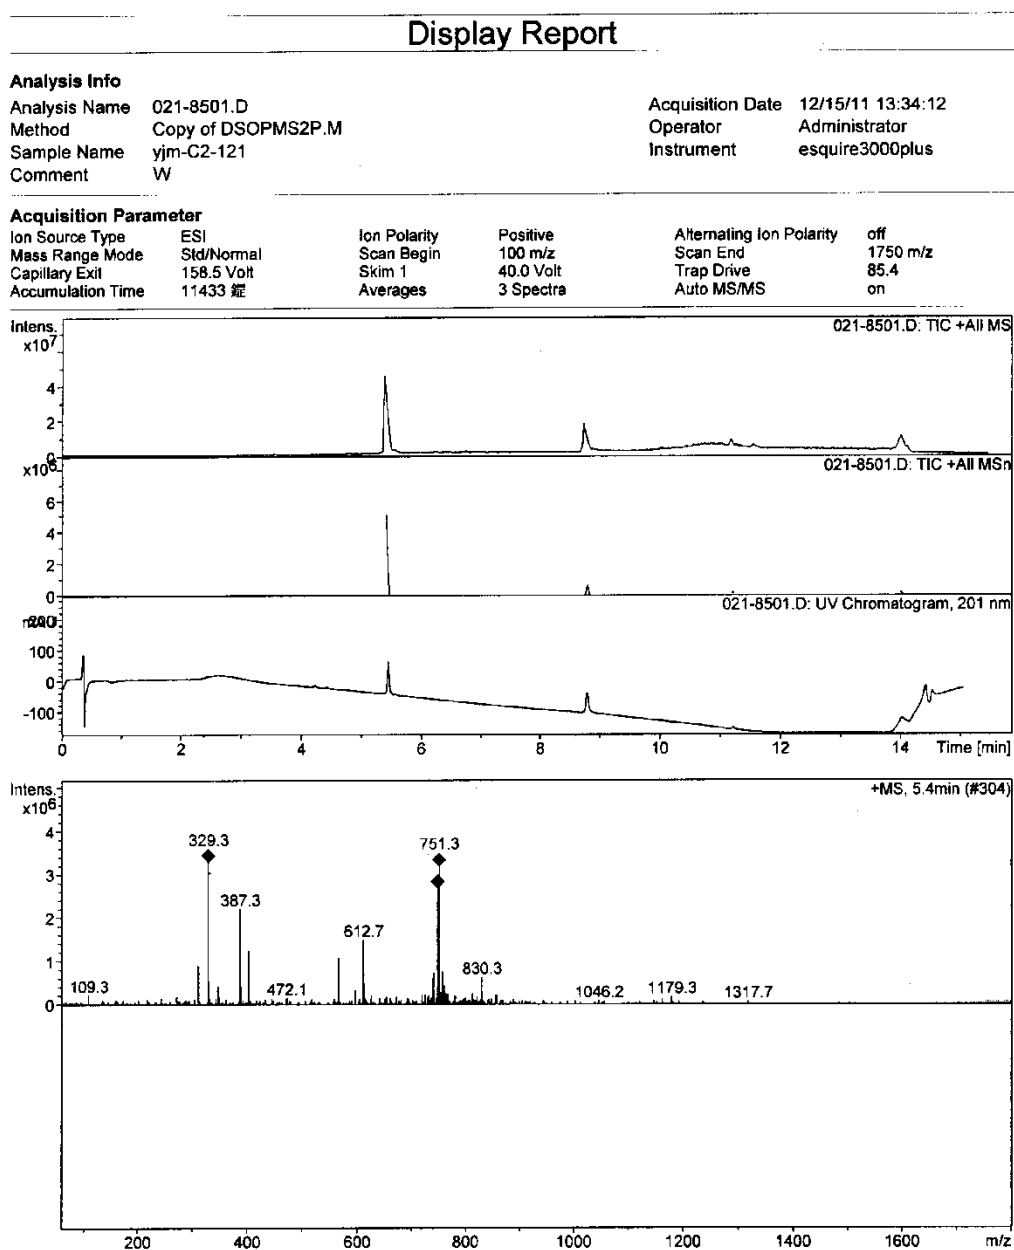

Figure S8. HRESI(-)MS spectrum of horipenoid A (1)

Elemental Composition Report

Page 1

Single Mass Analysis

Tolerance = 5.0 PPM / DBE: min = -1.5, max = 50.0

Element prediction: Off

Number of isotope peaks used for i-FIT = 3

Monoisotopic Mass, Even Electron Ions

64 formula(e) evaluated with 1 results within limits (up to 50 best isotopic matches for each mass)

Elements Used:

C: 10-50 H: 1-80 O: 0-30

EHC2-121

LCT PXE KE324

09-Mar-2012

13:37:10

EHC2-121\_20120309 14 (0.301) AM2 (Ar,11500.0,0.00,0.70); ABS; Cm (14:34)

1: TOF MS ES-  
1.93e+004

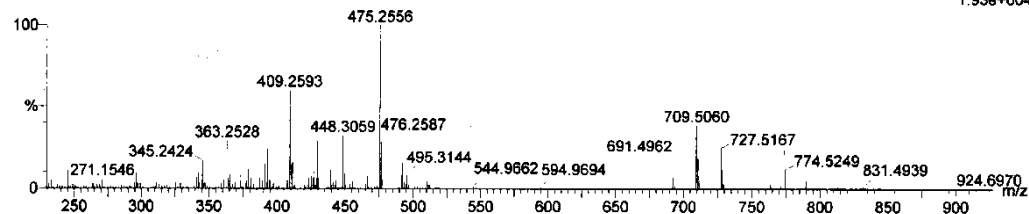

Minimum: -1.5  
Maximum: 5.0 5.0 50.0

| Mass     | Calc. Mass | mDa  | PPM  | DBE | i-FIT | i-FIT (Norm) | Formula    |
|----------|------------|------|------|-----|-------|--------------|------------|
| 363.2528 | 363.2535   | -0.7 | -1.9 | 5.5 | 196.2 | 0.0          | C22 H35 O4 |

Figure S9. IR spectrum of horipenoid A (1)

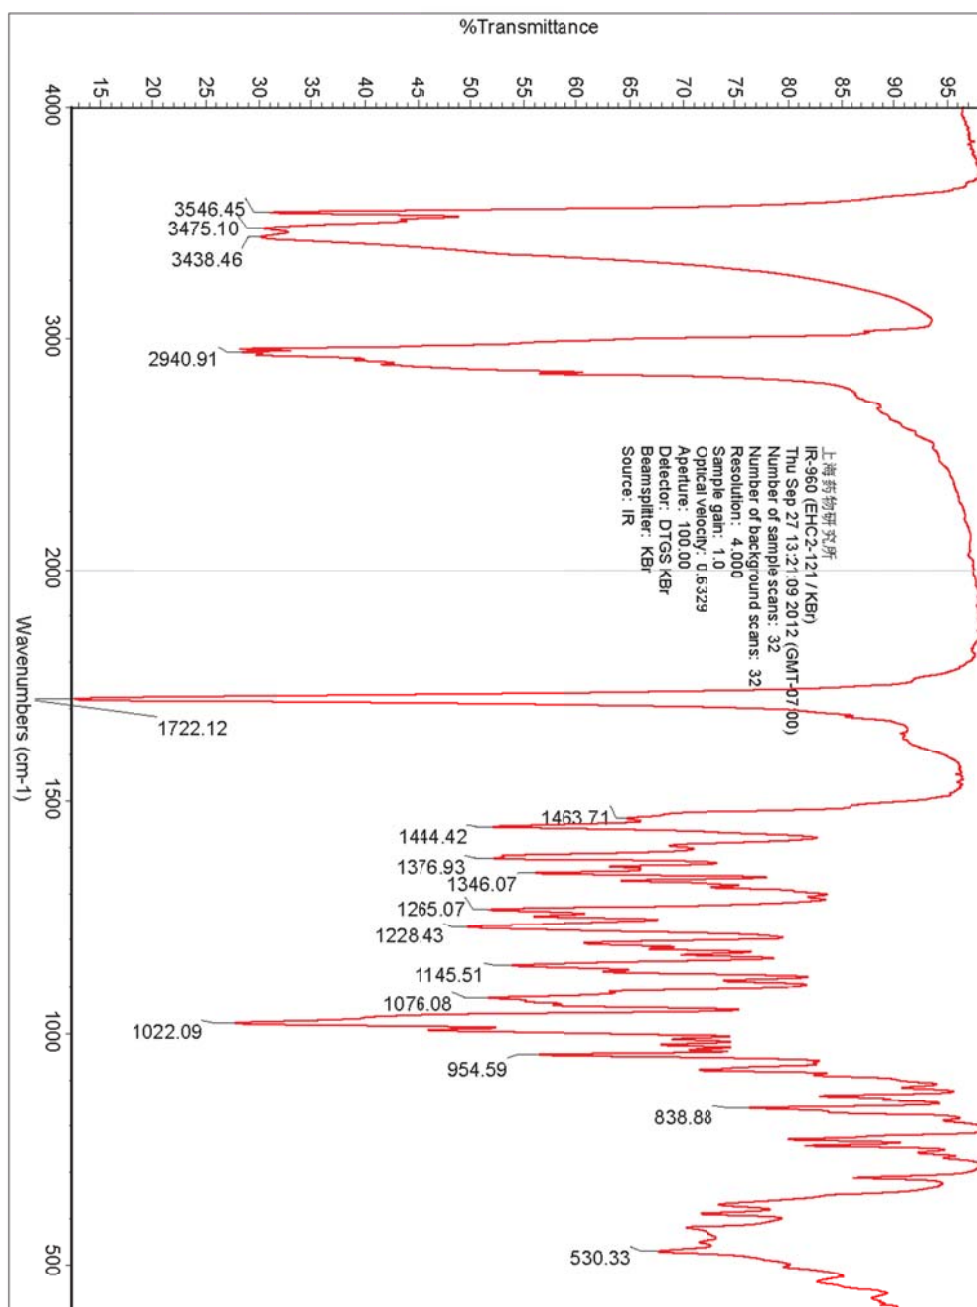

**Figure S10.**  $^1\text{H}$  NMR spectrum of horipenoid B (**2**) in  $\text{CD}_3\text{OD}$

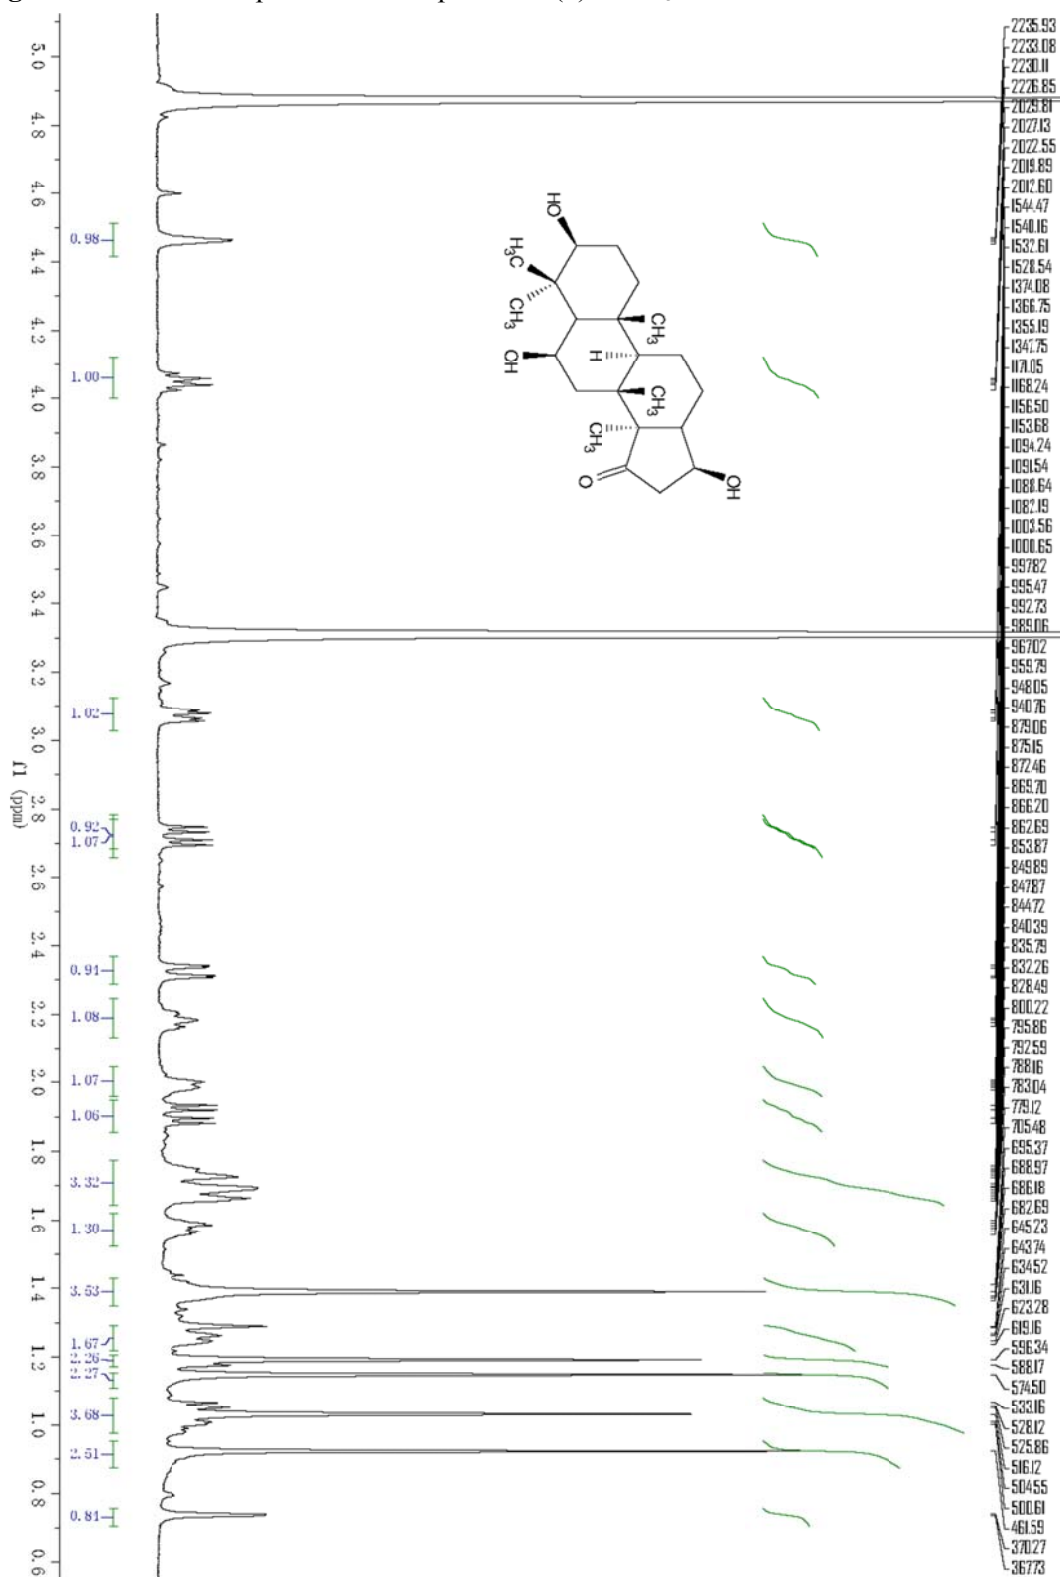

**Figure S11.**  $^{13}\text{C}$  NMR spectrum of horipenoid B (**2**) in  $\text{CD}_3\text{OD}$

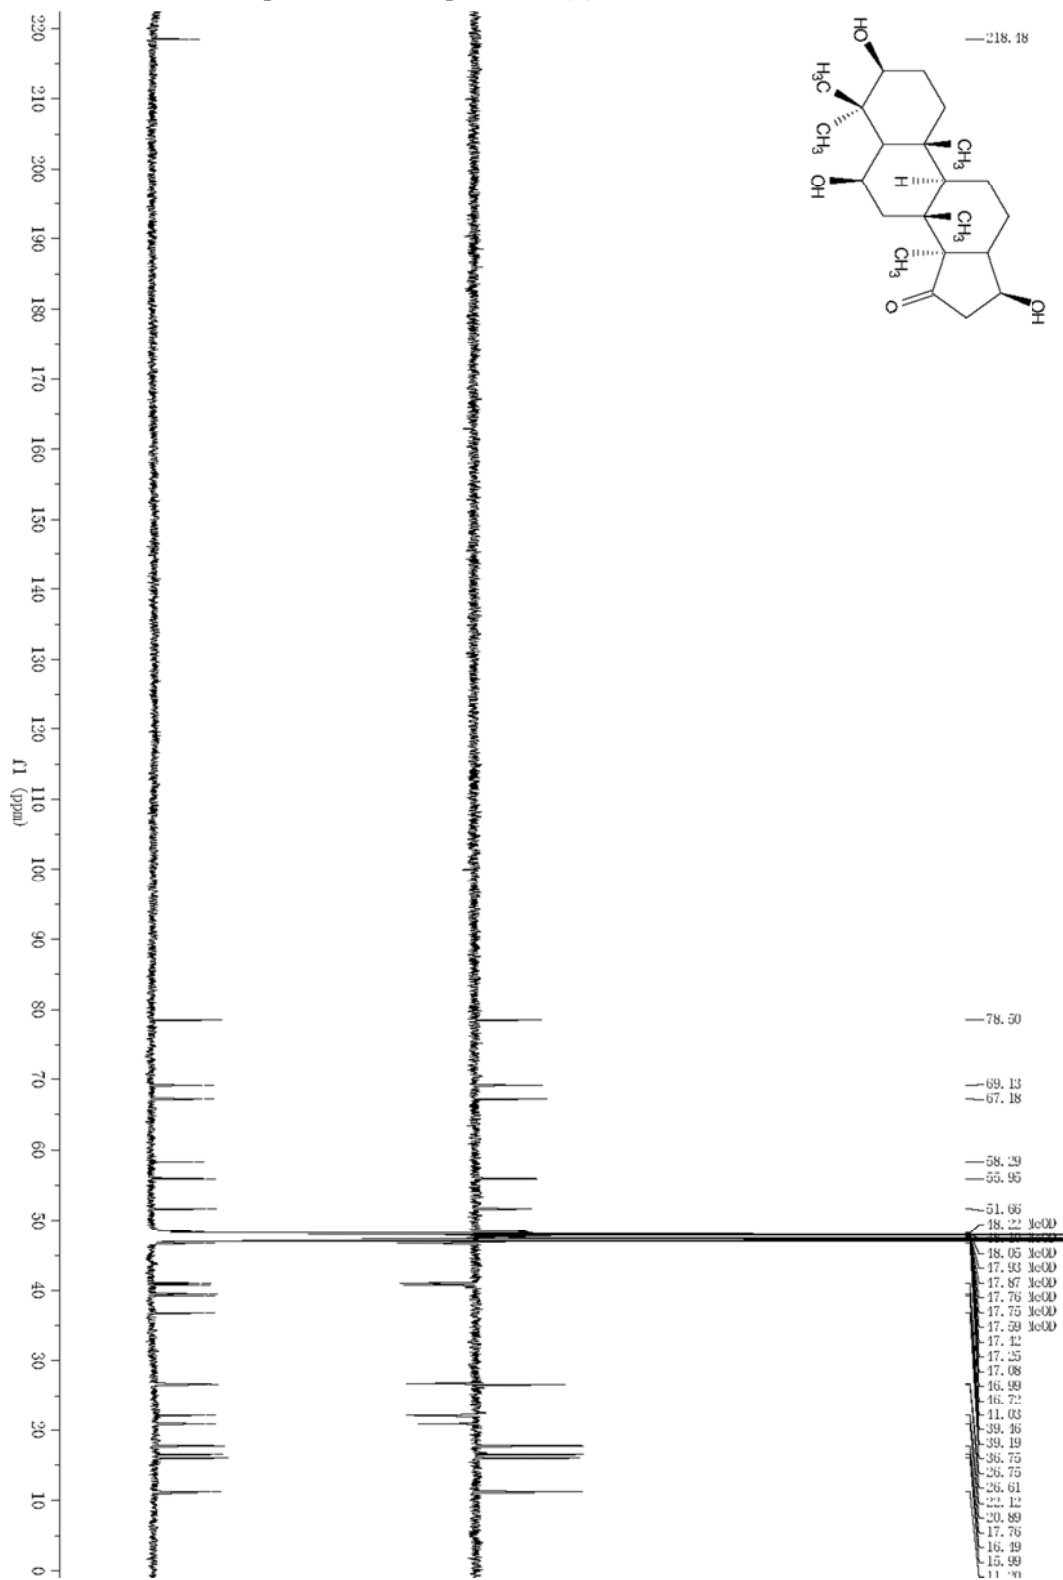



**Figure S12.** HSQC spectrum of horipenoid B (**2**) in CD<sub>3</sub>OD

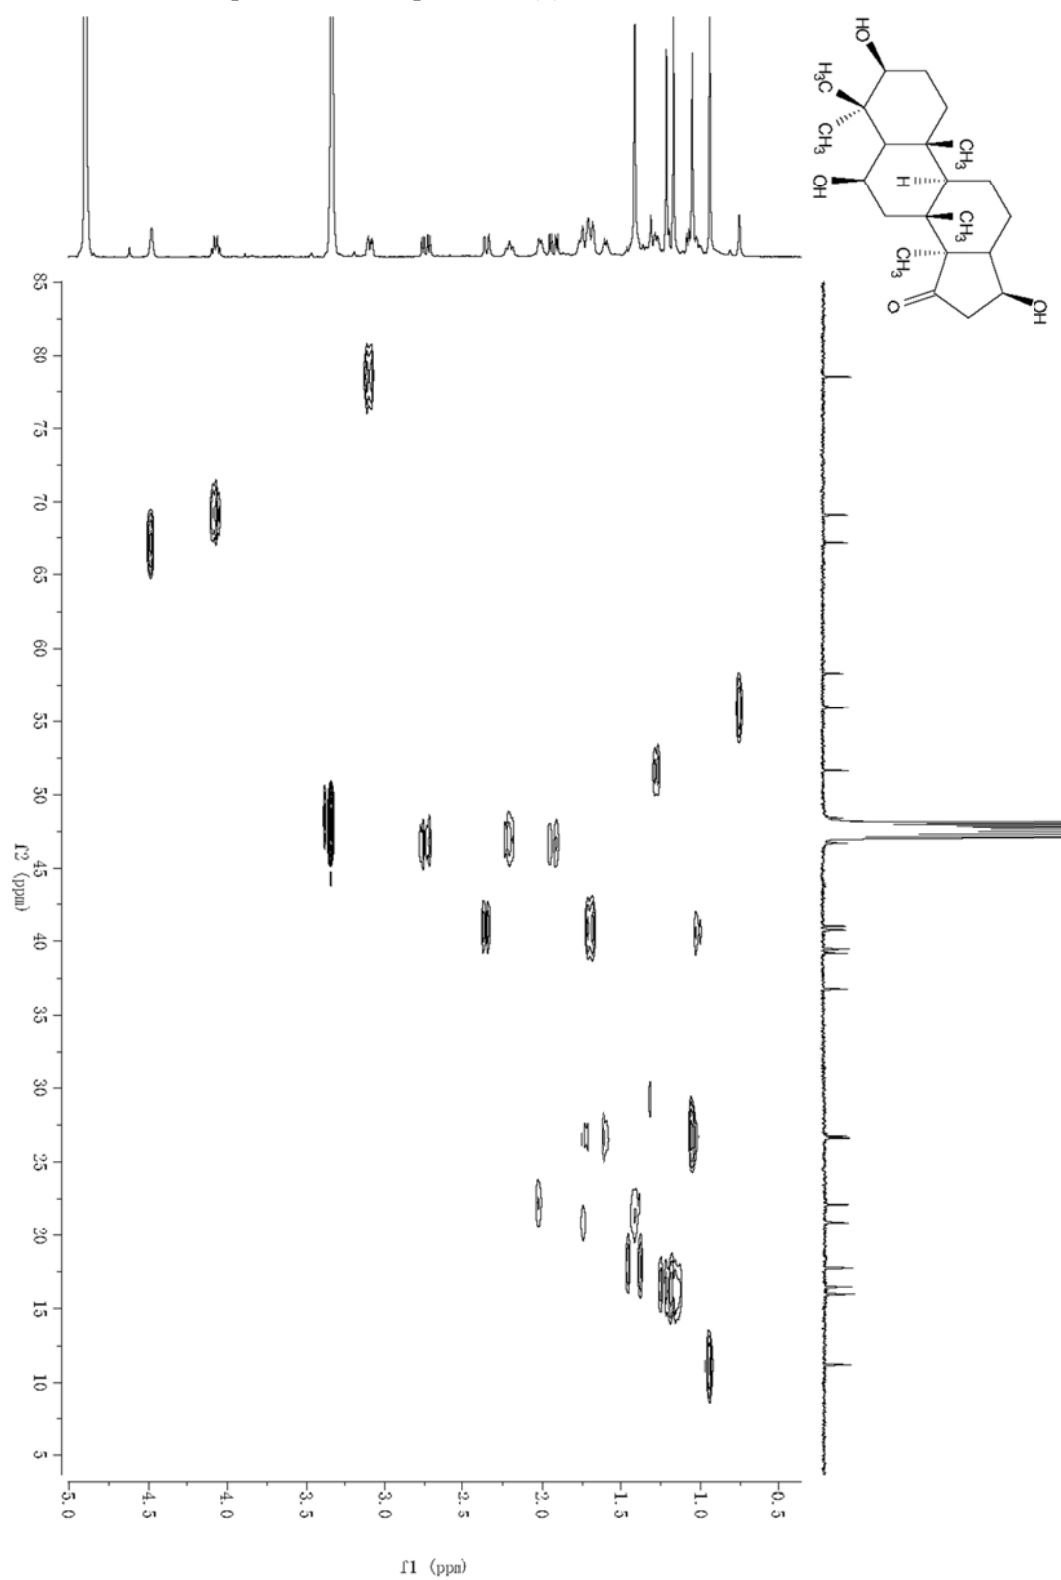

**Figure S13.** HMBC spectrum of horipenoid B (**2**) in CD<sub>3</sub>OD

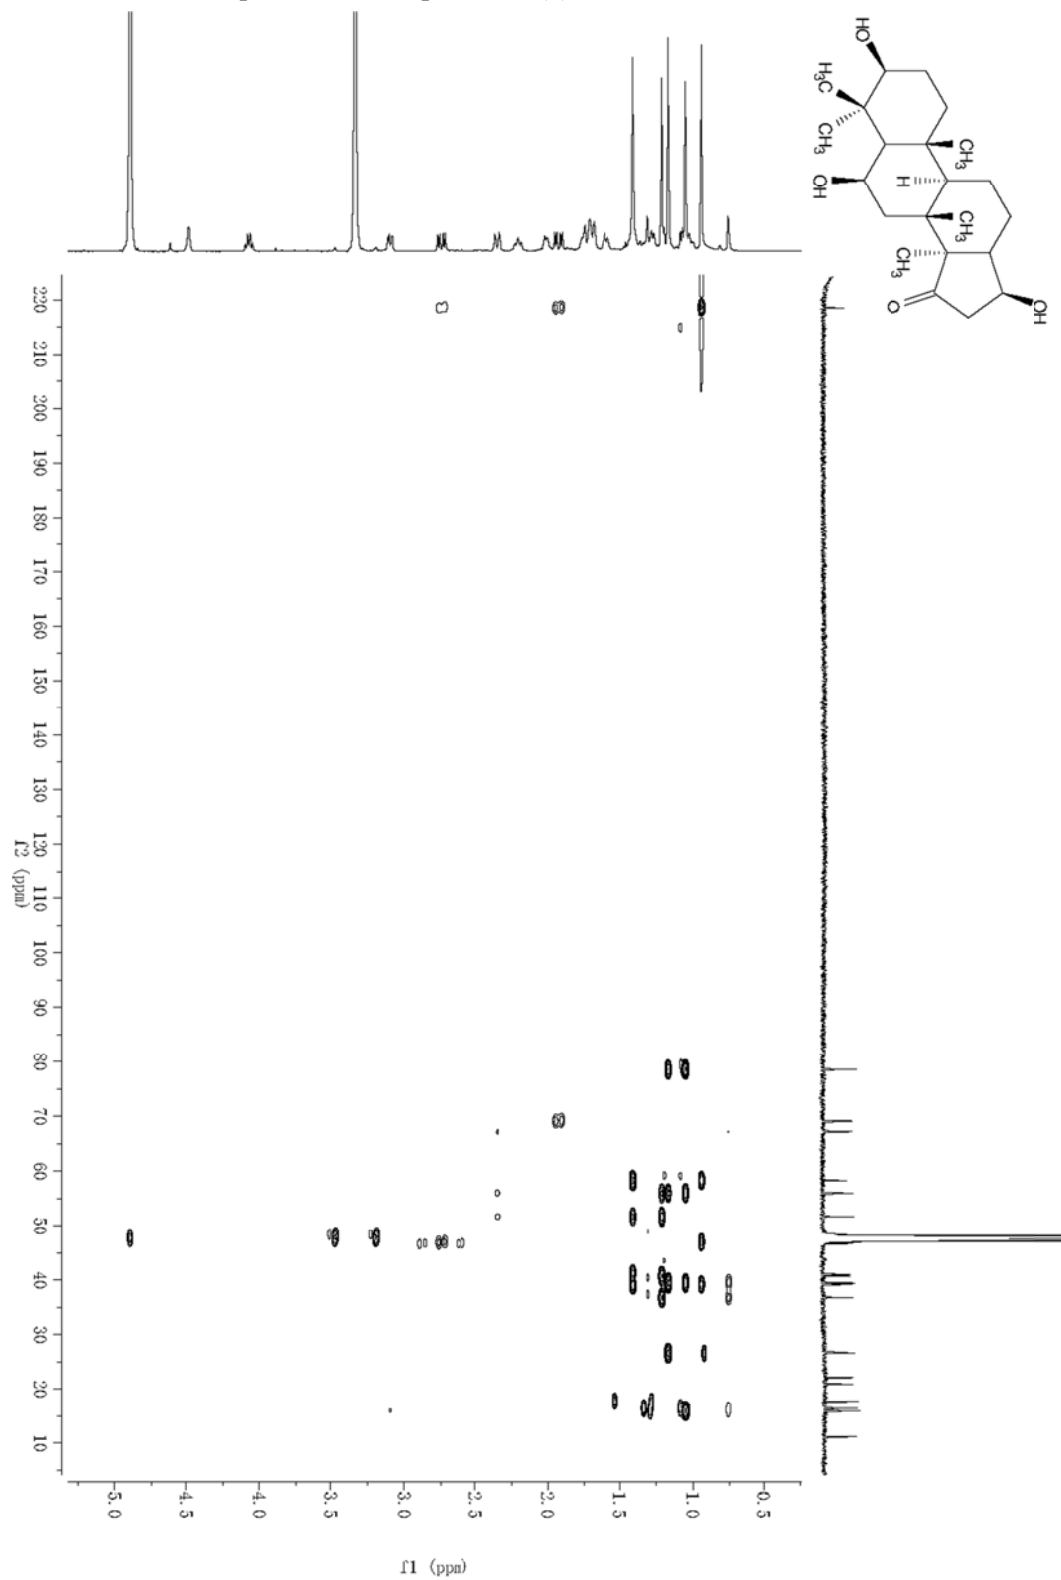

Figure S14. ROESY spectrum of horipenoid B (2) in CD<sub>3</sub>OD

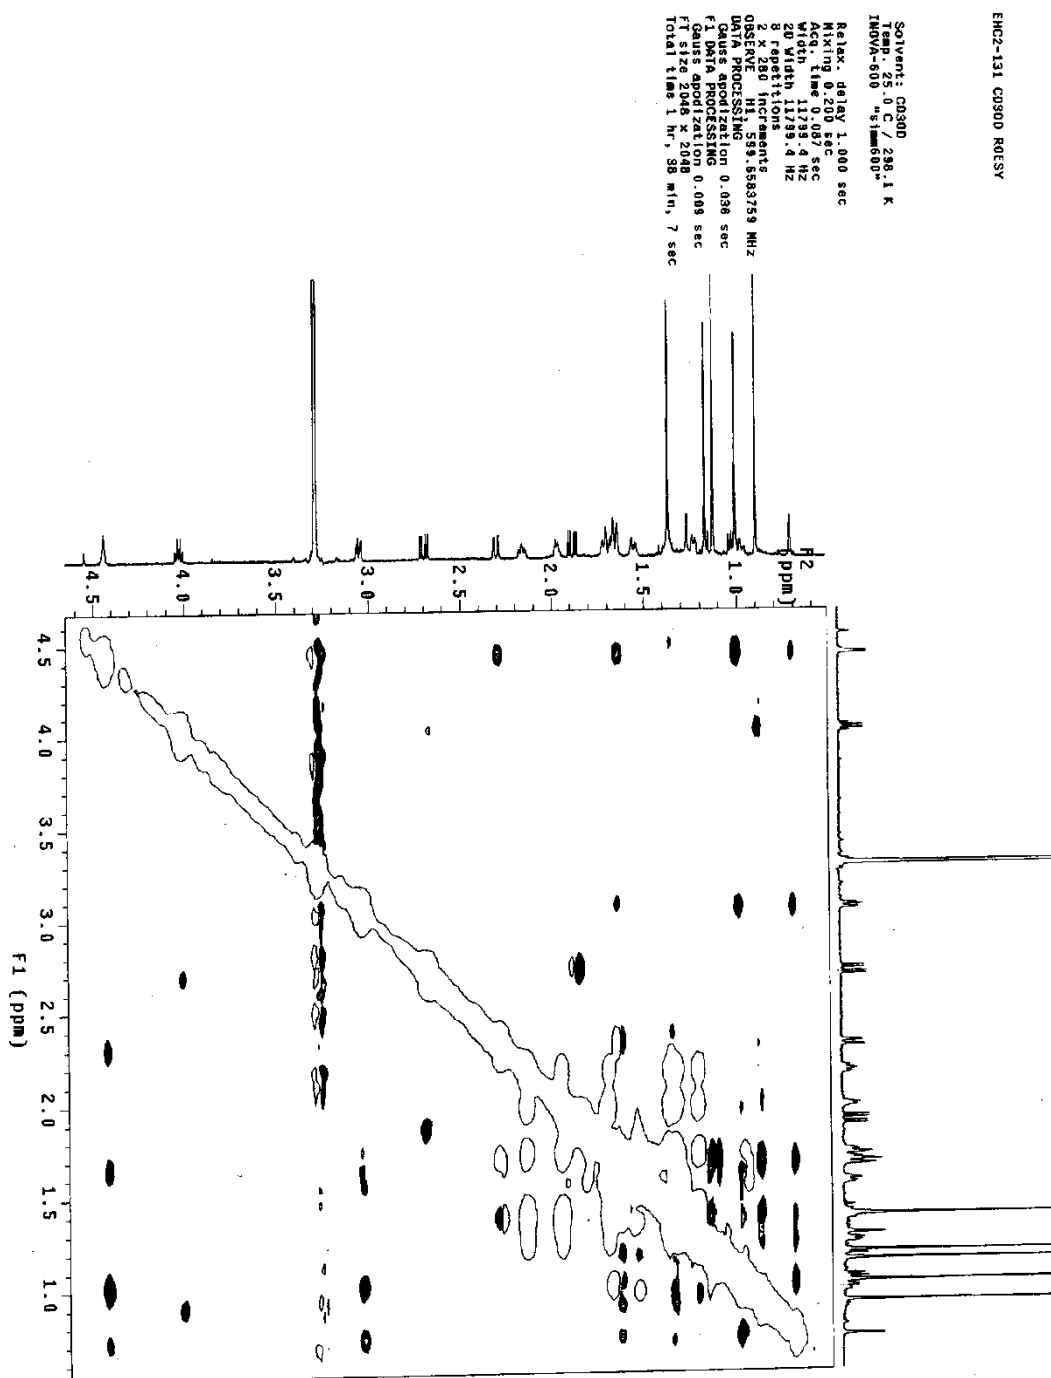

Figure S15. EIMS spectrum of horipenoid B (2)

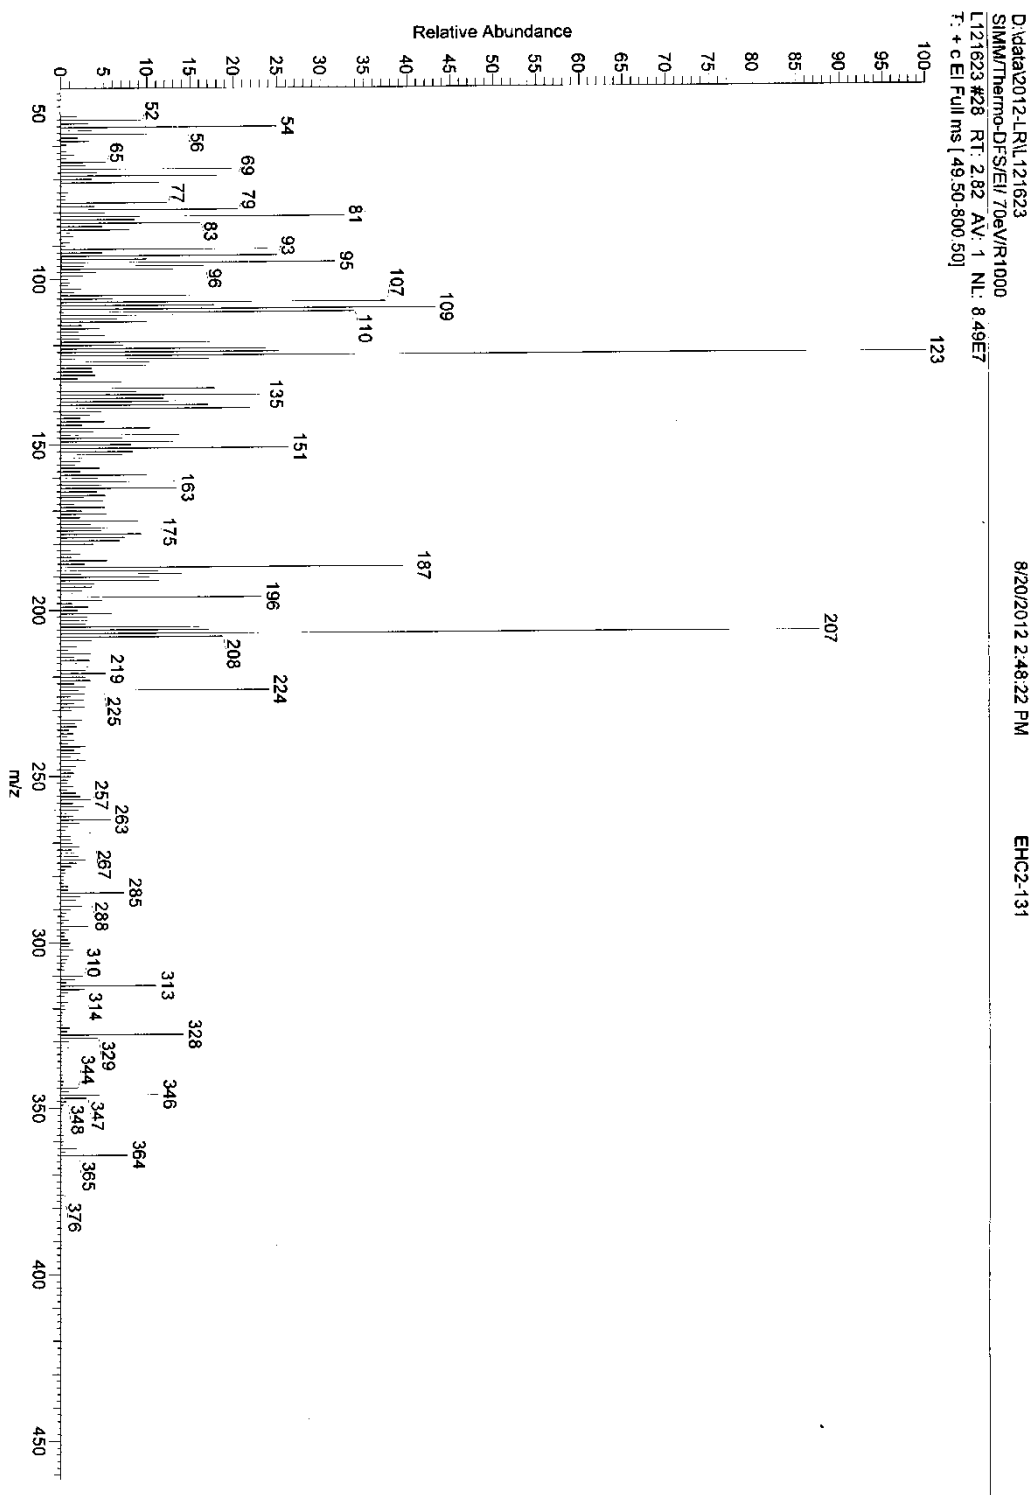

Figure S16. HREIMS spectrum of horipenoid B (2)

LIST: h120743-c1 25-Sep-12 Elapse: 05:36.9 27  
 Samp: EC2-131 Start : 16:36:31 28  
 Comm: Finnigan/MAT95//70eV/Tsou:220c/R:10000  
 Mode: EI +VE +LMR BSCAN (EXP) UP HR NRM Study : S/N: PT200712-01-01  
 Oper: WANG\_J@SIMM.CAS Inlet :  
 Limt: ( 0 )  
 : ( 441 ) C23.H100.04  
 Peak: 1000.00 mmu R+D: -2.0 > 60.0  
 Data: CMASS : converted

| Mass     | Intensity | %RA     | %RIC   | Delta | R+D  | Composition |            |
|----------|-----------|---------|--------|-------|------|-------------|------------|
| 71.04881 | *         | 242531  | 9.62   | 0.49  | 0.9  | 1.5         | C4.H7.O    |
| 77.03811 | *         | 205891  | 8.16   | 0.42  | 1.0  | 4.5         | C6.H5      |
| 79.05358 | *         | 418283  | 16.58  | 0.85  | 1.2  | 3.5         | C6.H7      |
| 81.06792 | *         | 805305  | 31.93  | 1.64  | 2.5  | 2.5         | C6.H9      |
| 83.04740 | *         | 217947  | 8.64   | 0.44  | 2.3  | 2.5         | C5.H7.O    |
| 85.06372 | *         | 205477  | 8.15   | 0.42  | 1.6  | 1.5         | C5.H9.O    |
| 91.05422 | *         | 418874  | 16.61  | 0.85  | 0.6  | 4.5         | C7.H7      |
| 93.07084 | *         | 619743  | 24.57  | 1.26  | -0.4 | 3.5         | C7.H9      |
| 94.07702 | *         | 215938  | 8.56   | 0.44  | 1.2  | 3.0         | C7.H10     |
| 95.08595 | *         | 652423  | 25.87  | 1.33  | 0.1  | 2.5         | C7.H11     |
| 96.09263 | *         | 219306  | 8.69   | 0.45  | 1.3  | 2.0         | C7.H12     |
| 97.06484 | *         | 273143  | 10.83  | 0.56  | 0.5  | 2.5         | C6.H9.O    |
| 105.0675 | *         | 421829  | 16.72  | 0.86  | 2.9  | 4.5         | C8.H9      |
| 107.0833 | *         | 908074  | 36.00  | 1.85  | 2.8  | 3.5         | C8.H11     |
| 108.0899 | *         | 294595  | 11.68  | 0.60  |      |             |            |
| 109.0626 | *         | 399904  | 15.85  | 0.81  | 2.7  | 3.5         | C7.H9.O    |
| 109.0988 | *         | 723693  | 28.69  | 1.47  | 2.9  | 2.5         | C8.H13     |
| 110.0707 | *         | 848978  | 33.66  | 1.73  | 2.5  | 3.0         | C7.H10.O   |
| 111.0779 | *         | 276275  | 10.95  | 0.56  |      |             |            |
| 113.0585 | *         | 238985  | 9.47   | 0.49  | 1.7  | 2.5         | C6.H9.O2   |
| 119.0855 | *         | 484649  | 19.21  | 0.99  | 0.6  | 4.5         | C9.H11     |
| 121.1013 | *         | 562006  | 22.28  | 1.14  | 0.4  | 3.5         | C9.H13     |
| 122.1087 | *         | 464438  | 18.41  | 0.94  | 0.8  | 3.0         | C9.H14     |
| 123.0805 | *         | 619152  | 24.55  | 1.26  | 0.4  | 3.5         | C8.H11.O   |
| 123.1169 | *         | 2522350 | 100.00 | 5.13  | 0.5  | 2.5         | C9.H15     |
| 124.1199 | *         | 231657  | 9.18   | 0.47  |      |             |            |
| 126.0675 | *         | 351386  | 13.93  | 0.71  | 0.6  | 3.0         | C7.H10.O2  |
| 133.1009 | *         | 471943  | 18.71  | 0.96  | 0.8  | 4.5         | C10.H13    |
| 134.1075 | *         | 210087  | 8.33   | 0.43  | 2.1  | 4.0         | C10.H14    |
| 135.0806 | *         | 265697  | 10.53  | 0.54  | 0.4  | 4.5         | C9.H11.O   |
| 135.1167 | *         | 396477  | 15.72  | 0.81  | 0.7  | 3.5         | C10.H15    |
| 137.0954 | *         | 259964  | 10.31  | 0.53  | 1.3  | 3.5         | C9.H13.O   |
| 138.0675 | *         | 525839  | 20.85  | 1.07  | 0.6  | 4.0         | C8.H10.O2  |
| 139.0750 | *         | 480571  | 19.05  | 0.98  | 0.9  | 3.5         | C8.H11.O2  |
| 145.1010 | *         | 290931  | 11.53  | 0.59  | 0.7  | 5.5         | C11.H13    |
| 147.1165 | *         | 315751  | 12.52  | 0.64  | 0.9  | 4.5         | C11.H15    |
| 149.1323 | *         | 234671  | 9.30   | 0.48  | 0.7  | 3.5         | C11.H17    |
| 151.1124 | *         | 550423  | 21.82  | 1.12  | -0.1 | 3.5         | C10.H15.O  |
| 159.1176 | *         | 259019  | 10.27  | 0.53  | -0.2 | 5.5         | C12.H15    |
| 161.1331 | *         | 215819  | 8.56   | 0.44  | 0.0  | 4.5         | C12.H17    |
| 163.1127 | *         | 288744  | 11.45  | 0.59  | -0.4 | 4.5         | C11.H15.O  |
| 173.1334 | *         | 218183  | 8.65   | 0.44  | -0.4 | 5.5         | C13.H17    |
| 175.1485 | *         | 209082  | 8.29   | 0.43  | 0.1  | 4.5         | C13.H19    |
| 187.1487 | *         | 1029694 | 40.82  | 2.09  | 0.0  | 5.5         | C14.H19    |
| 188.1539 | *         | 290754  | 11.53  | 0.59  | 2.6  | 5.0         | C14.H20    |
| 189.1643 | *         | 338622  | 13.42  | 0.69  | 0.0  | 4.5         | C14.H21    |
| 190.1709 | *         | 242176  | 9.60   | 0.49  | 1.3  | 4.0         | C14.H22    |
| 196.1464 | *         | 618147  | 24.51  | 1.26  | 0.0  | 3.0         | C12.H20.O2 |
| 205.1599 | *         | 409833  | 16.25  | 0.83  | -0.7 | 4.5         | C14.H21.O  |
| 206.1671 | *         | 314865  | 12.48  | 0.64  | 0.0  | 4.0         | C14.H22.O  |
| 207.1756 | *         | 2245838 | 89.04  | 4.57  | -0.7 | 3.5         | C14.H23.O  |
| 208.1805 | *         | 454096  | 18.00  | 0.92  | 2.2  | 3.0         | C14.H24.O  |
| 224.1406 | *         | 559819  | 22.19  | 1.14  | 0.7  | 4.0         | C13.H20.O3 |
| 313.2204 | *         | 310196  | 12.30  | 0.63  |      |             |            |
| 328.2400 | *         | 367520  | 14.57  | 0.75  | 0.3  | 7.0         | C22.H32.O2 |
| 346.2512 | *         | 253346  | 10.04  | 0.52  | -0.4 | 6.0         | C22.H34.O3 |

Figure S17. IR spectrum of horipenoid B (2)

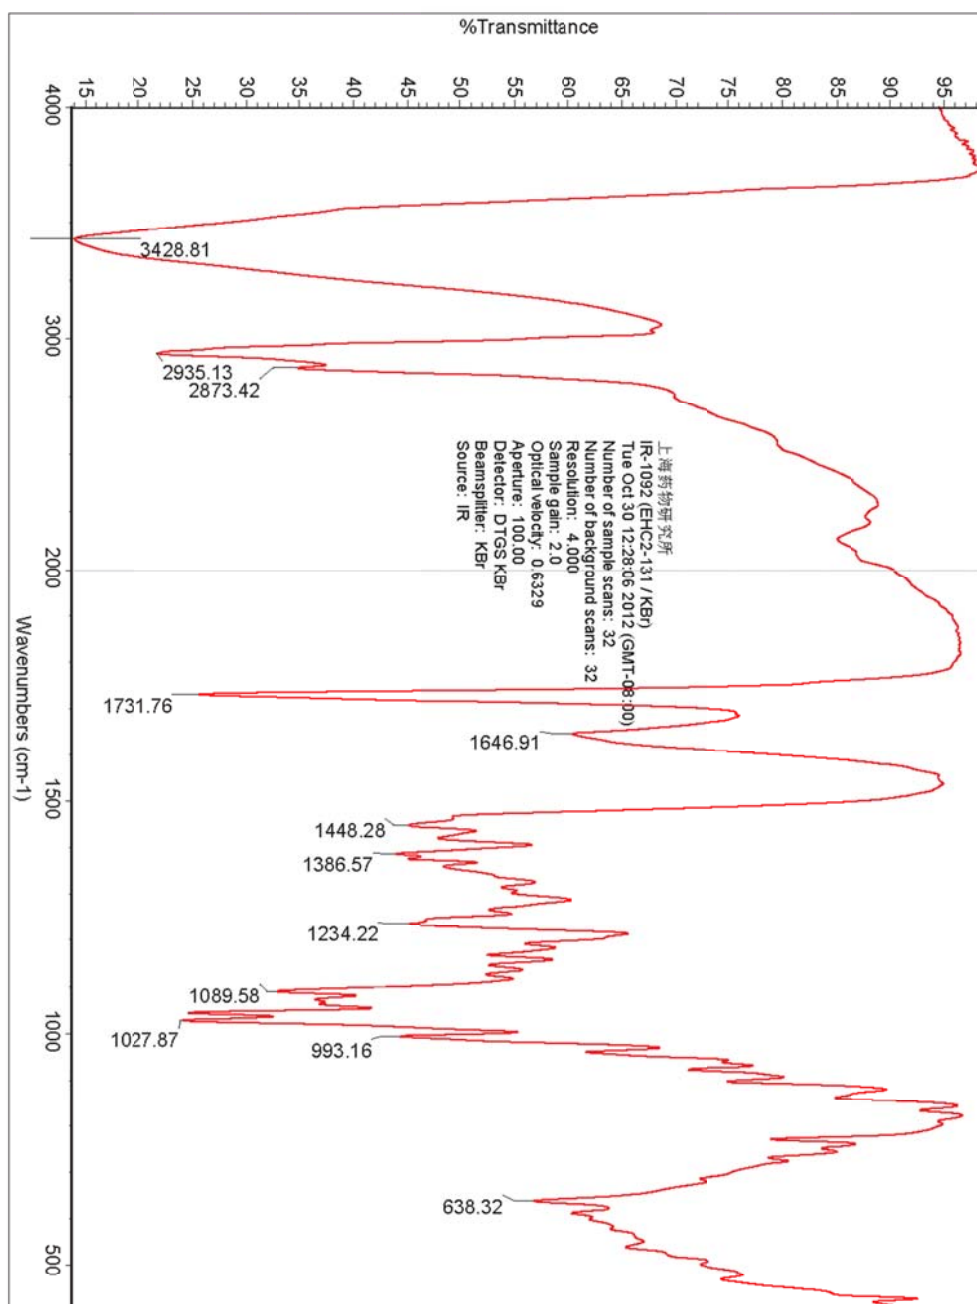

**Figure S18.**  $^1\text{H}$  NMR spectrum of horipenoid C (**3**) in  $\text{CDCl}_3$

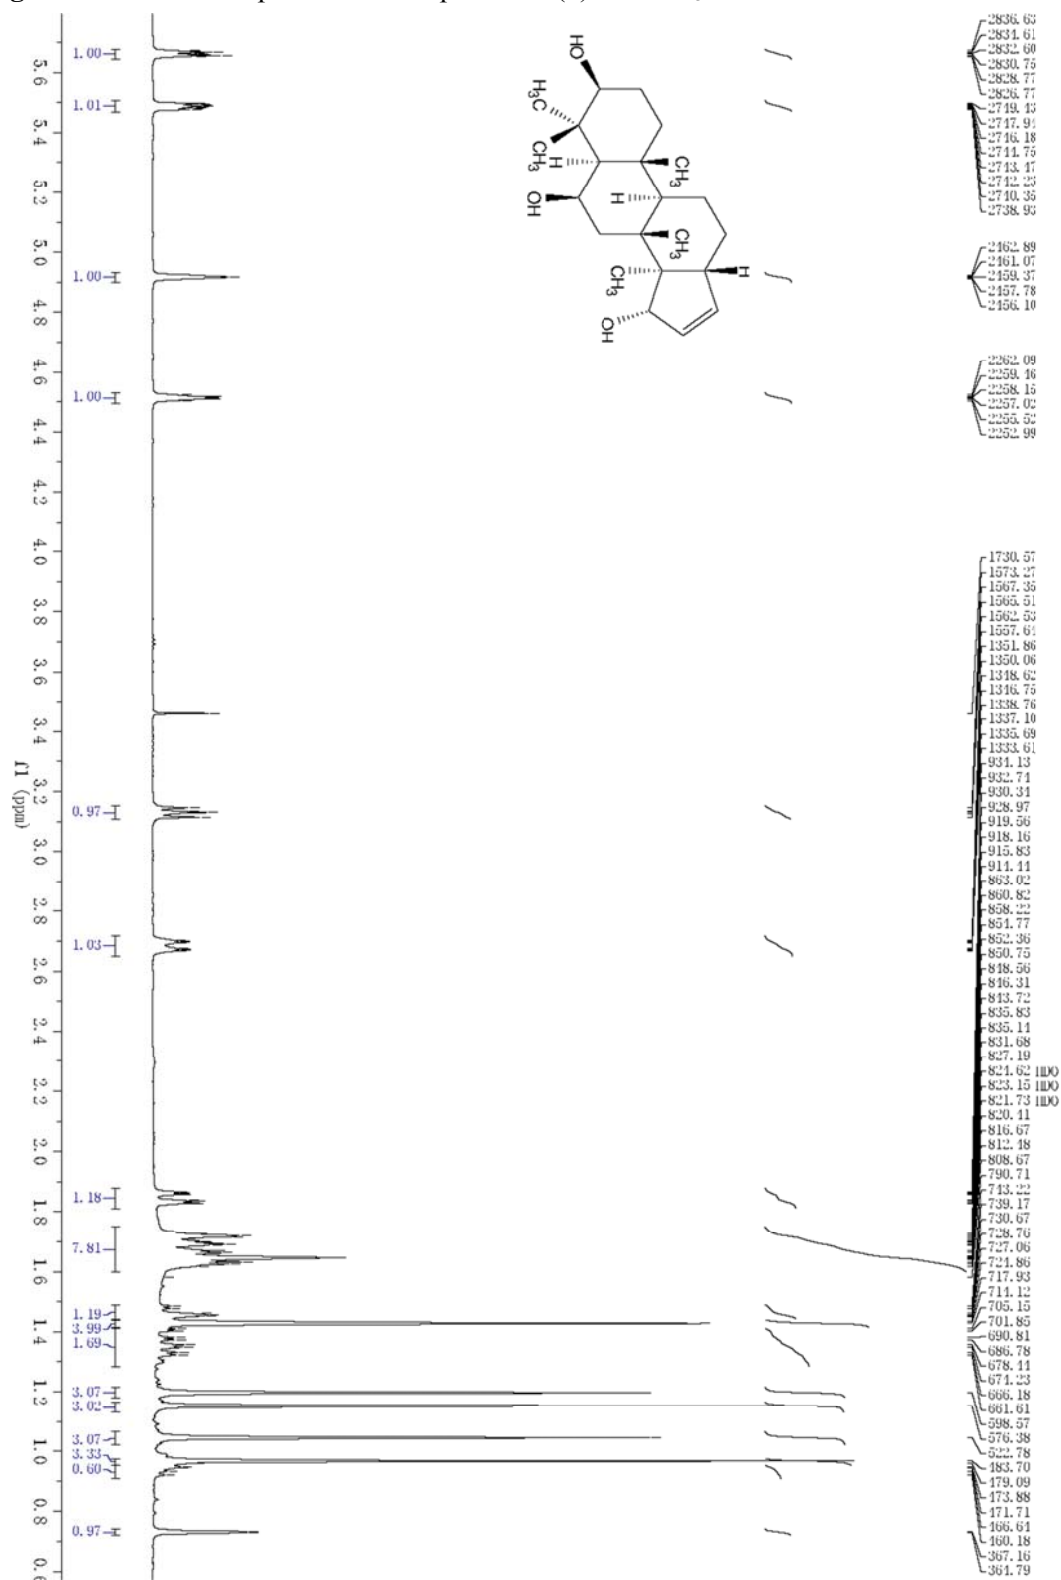

**Figure S19.**  $^{13}\text{C}$  NMR spectrum of horipenoid C (**3**) in  $\text{CDCl}_3$

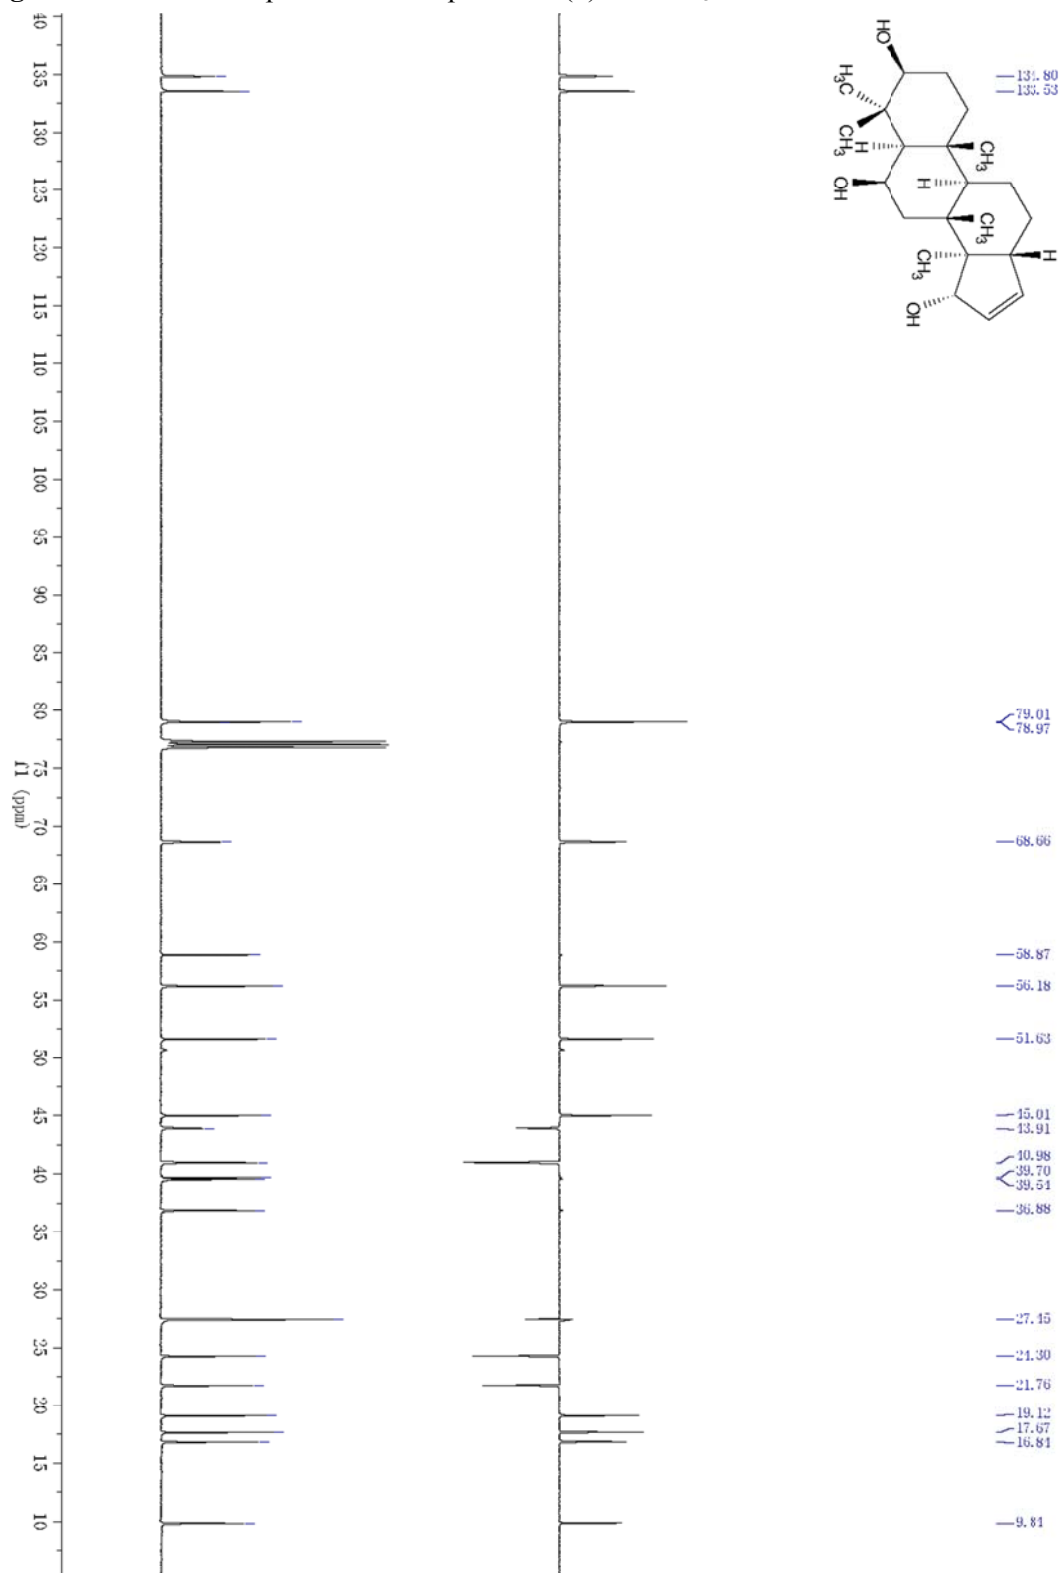



**Figure S20.**  $^1\text{H}$ - $^1\text{H}$ COASY spectrum of horipenoid C (**3**) in  $\text{CDCl}_3$

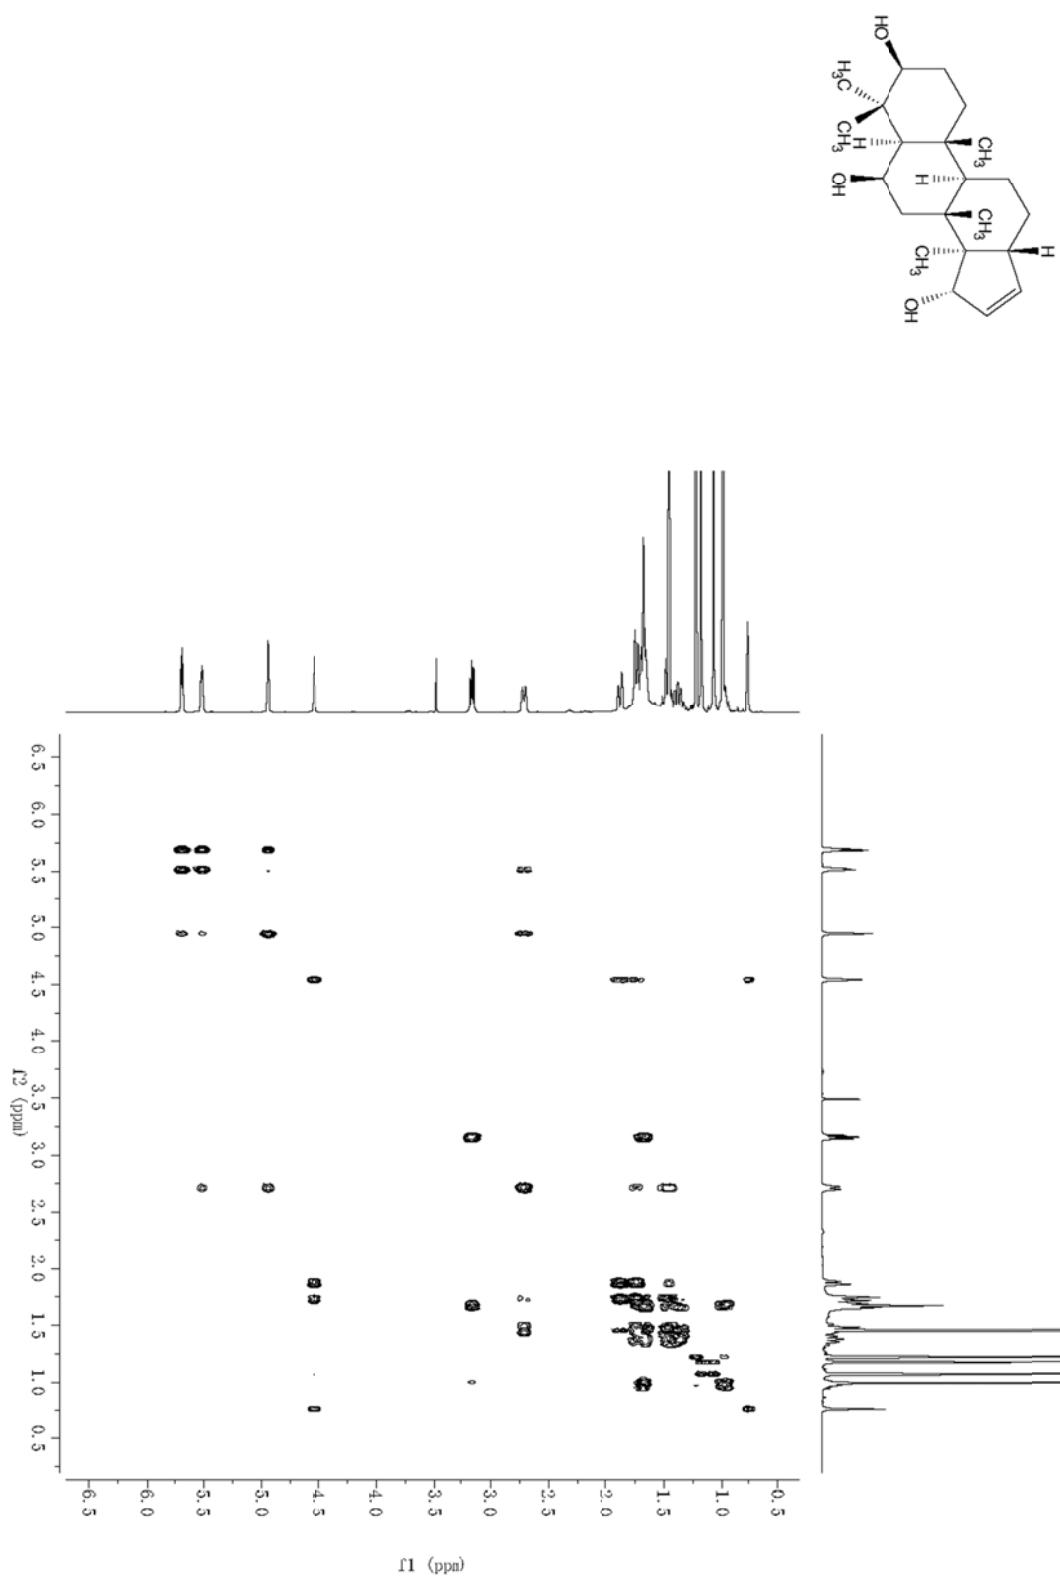

**Figure S21.** HSQC spectrum of horipenoid C (**3**) in CDCl<sub>3</sub>

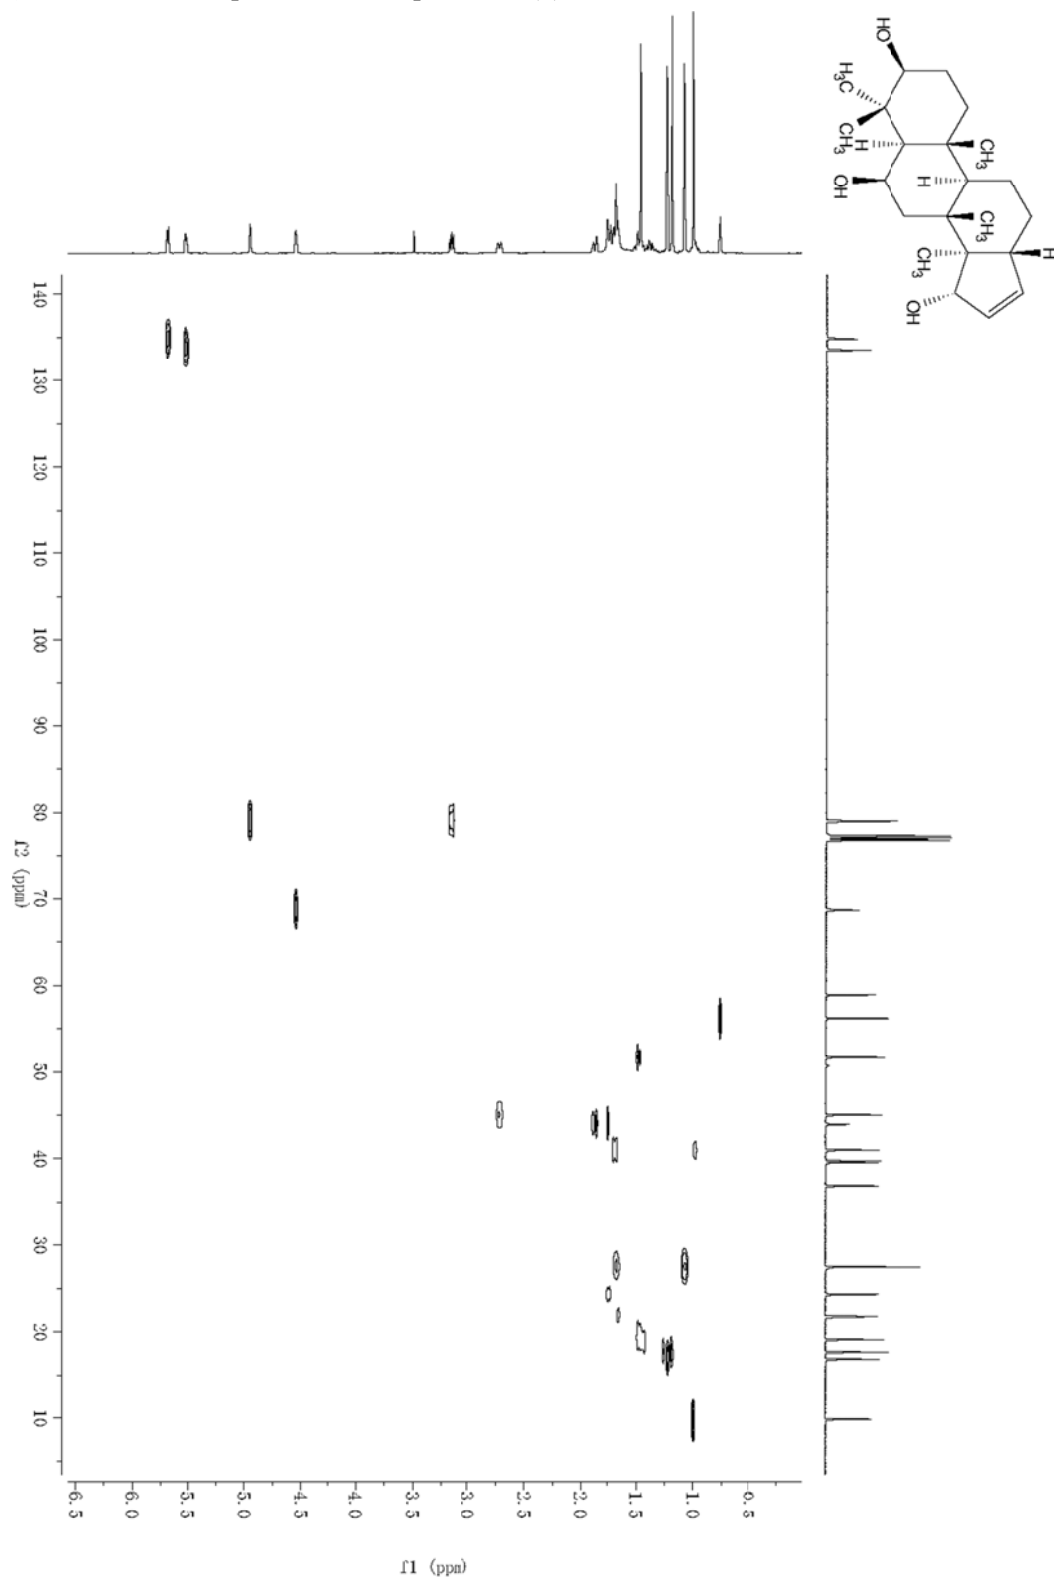

**Figure S22.** HMBC spectrum of horipenoid C (**3**) in CDCl<sub>3</sub>

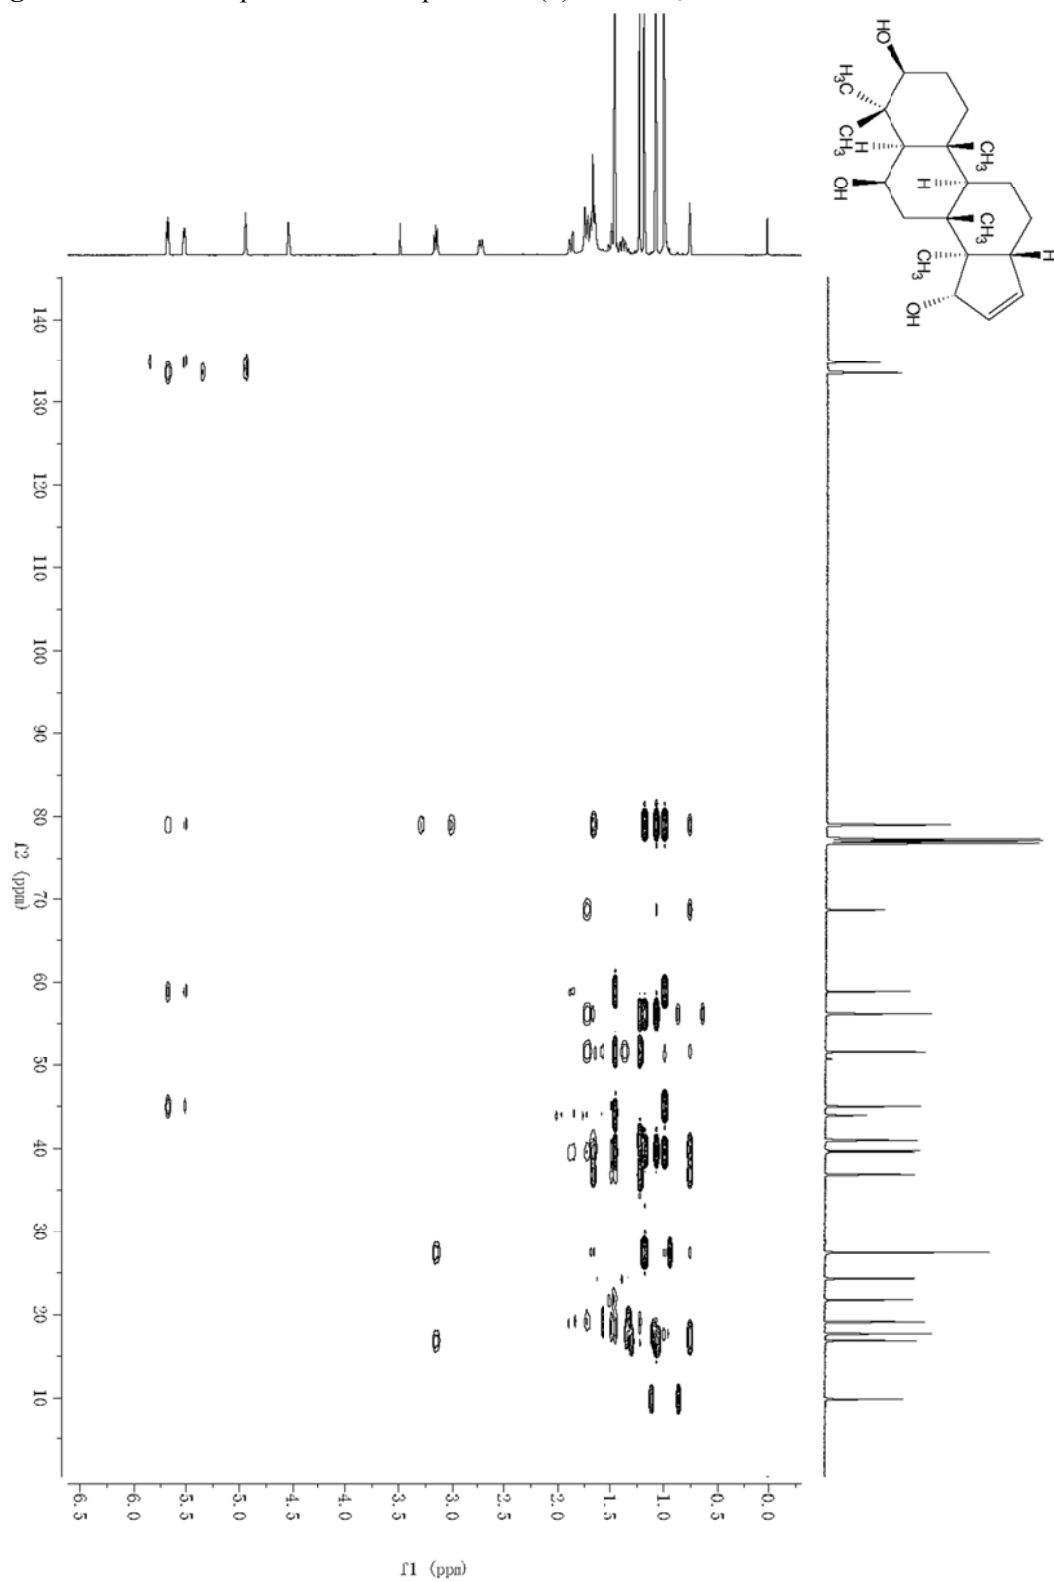

Figure S23. ROESY spectrum of horipenoid C (3) in CDCl<sub>3</sub>

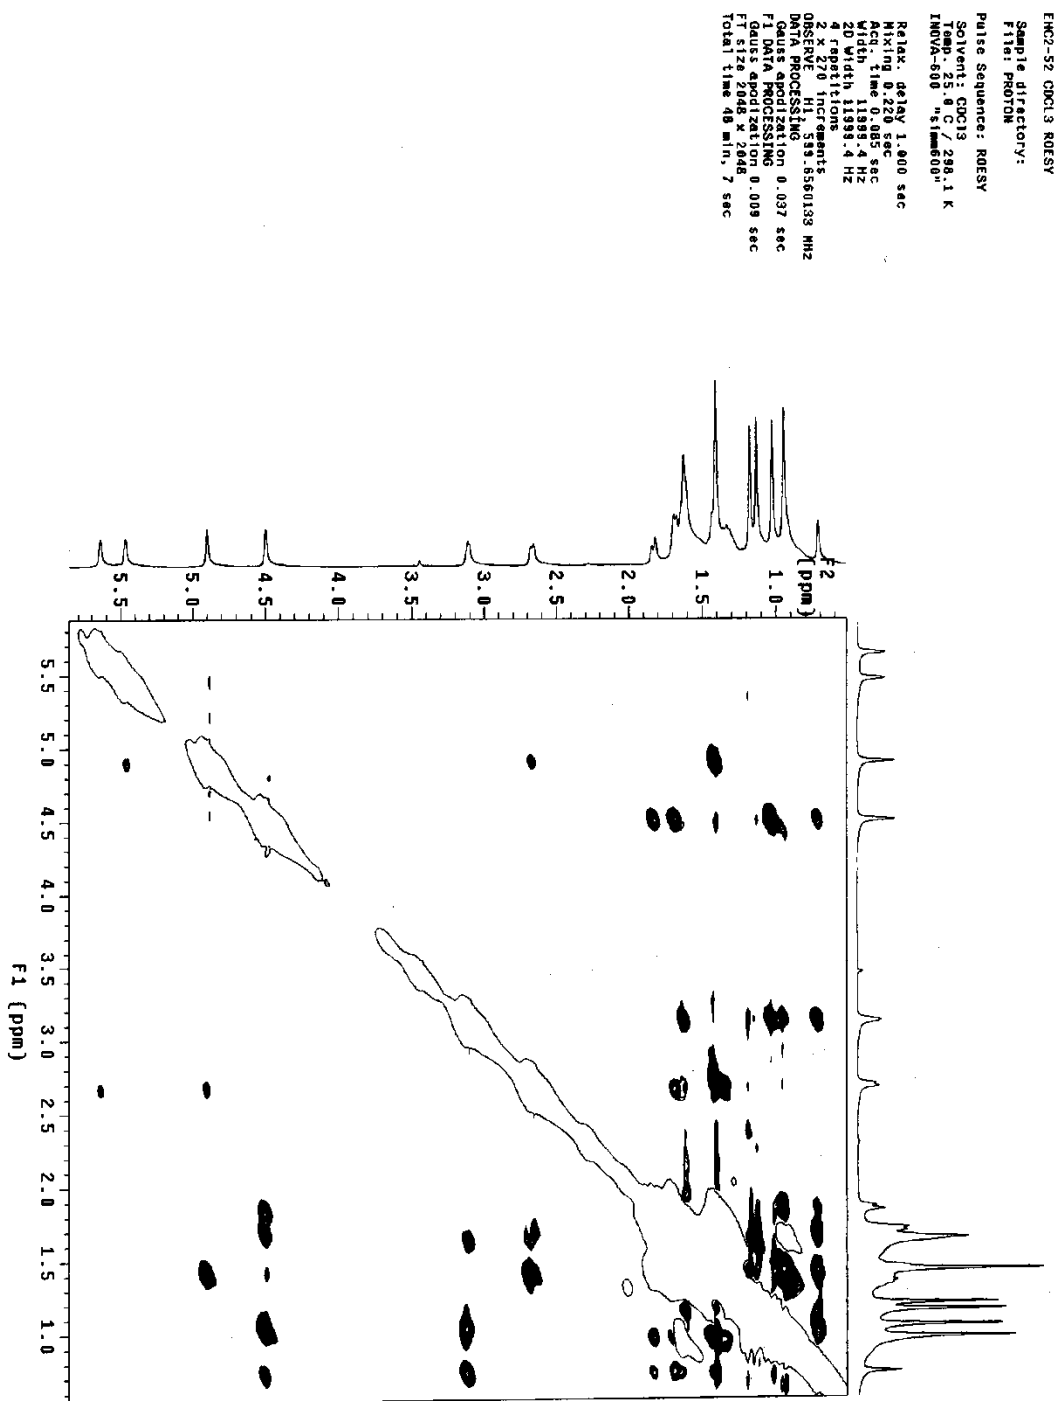

Figure S24. ESI(+)MS spectrum of horipenoid C (3)

### Display Report

**Analysis Info**

|               |                    |                  |                   |
|---------------|--------------------|------------------|-------------------|
| Analysis Name | 009-1101.D         | Acquisition Date | 12/29/11 16:04:47 |
| Method        | Copy of DSOPMS2P.M | Operator         | Administrator     |
| Sample Name   | yjm-EHC2-52        | Instrument       | esquire3000plus   |
| Comment       | W                  |                  |                   |

**Acquisition Parameter**

|                   |            |              |           |                          |          |
|-------------------|------------|--------------|-----------|--------------------------|----------|
| Ion Source Type   | ESI        | Ion Polarity | Positive  | Alternating Ion Polarity | off      |
| Mass Range Mode   | Std/Normal | Scan Begin   | 100 m/z   | Scan End                 | 1750 m/z |
| Capillary Exit    | 158.5 Volt | Skim 1       | 40.0 Volt | Trap Drive               | 85.4     |
| Accumulation Time | 15000 罫    | Averages     | 3 Spectra | Auto MS/MS               | on       |

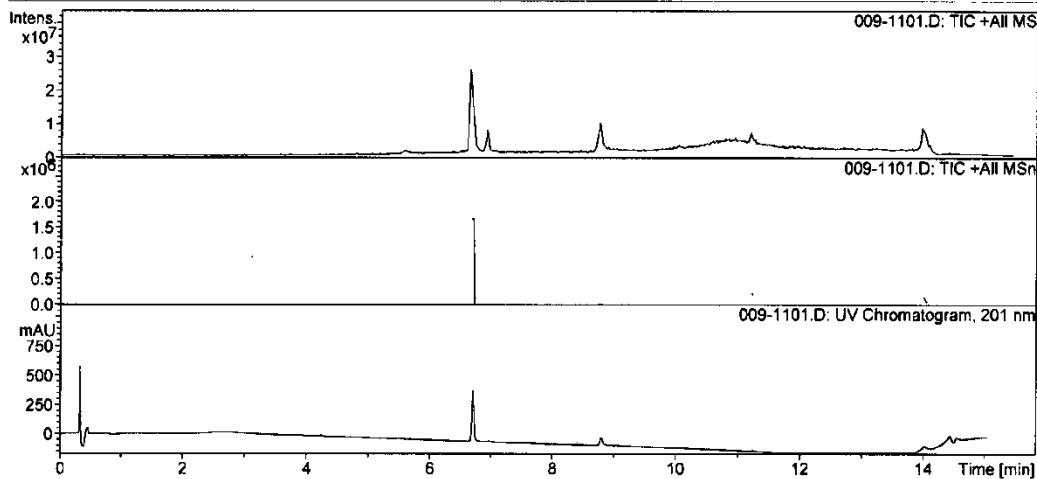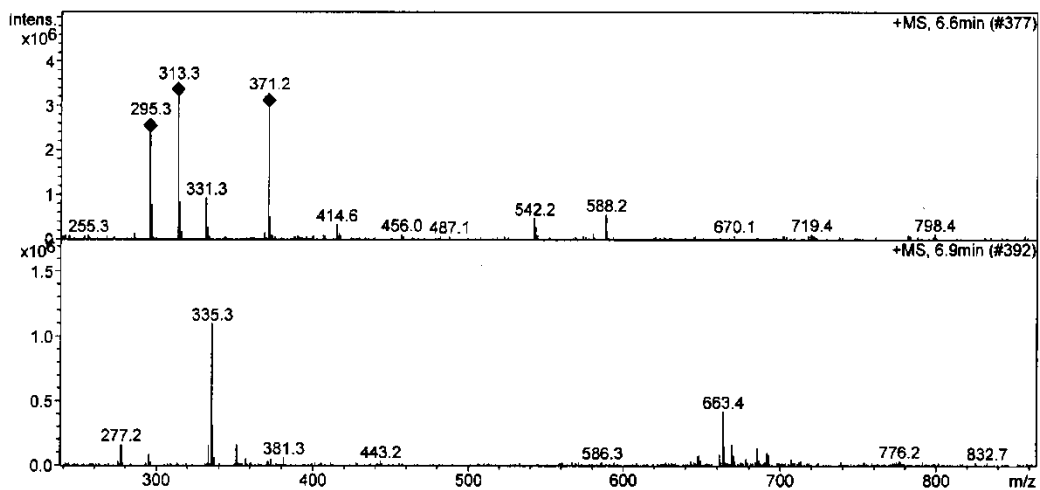

Figure S25. ESI(-)MS spectrum of horipenoid C (3)

### Display Report

**Analysis Info**

Analysis Name 009-2301.D  
 Method Copy of DSOPMS2N.M  
 Sample Name yjm-EHC2-52  
 Comment W

Acquisition Date 12/29/11 19:20:25  
 Operator Administrator  
 Instrument esquire3000plus

**Acquisition Parameter**

|                   |             |              |            |                          |          |
|-------------------|-------------|--------------|------------|--------------------------|----------|
| Ion Source Type   | ESI         | Ion Polarity | Negative   | Alternating Ion Polarity | off      |
| Mass Range Mode   | Std/Normal  | Scan Begin   | 100 m/z    | Scan End                 | 1750 m/z |
| Capillary Exit    | -158.5 Volt | Skim 1       | -40.0 Volt | Trap Drive               | 92.9     |
| Accumulation Time | 15000 纒     | Averages     | 3 Spectra  | Auto MS/MS               | on       |

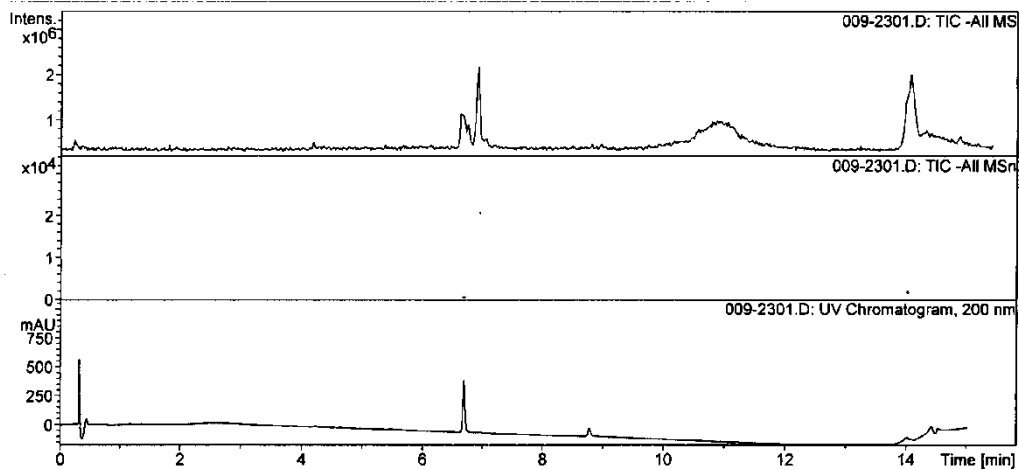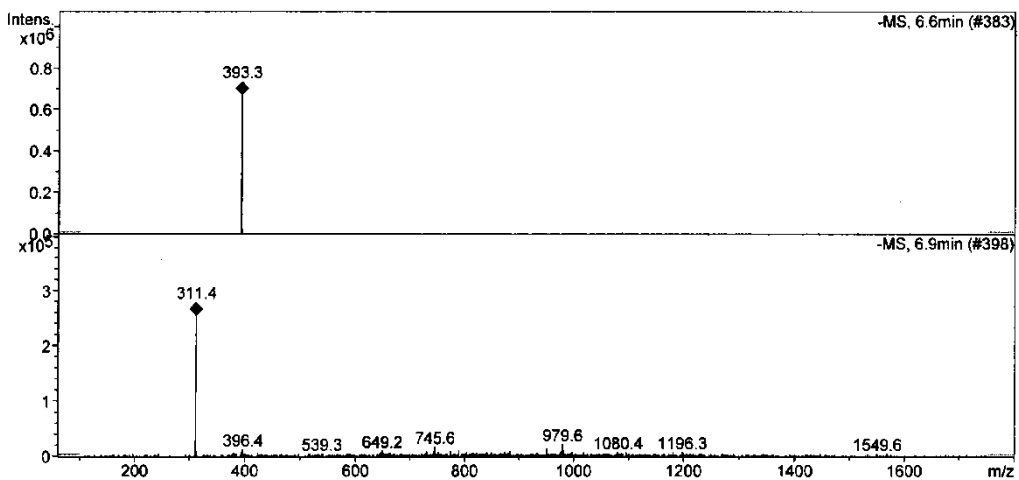

Figure S26. HRESI(-)MS spectrum of horipenoid C (3)

Elemental Composition Report

Page 1

Single Mass Analysis

Tolerance = 5.0 PPM / DBE: min = -1.5, max = 50.0  
 Element prediction: Off  
 Number of isotope peaks used for i-FIT = 3

Monoisotopic Mass, Even Electron Ions

76 formula(e) evaluated with 1 results within limits (up to 50 best isotopic matches for each mass)

Elements Used:

C: 10-50 H: 1-80 O: 0-30

EHC2-52

LCT PXE KE324

09-Mar-2012

14:18:02

EHC2-52\_20120309 10 (0.212) AM2 (Ar,10000.0,0.00,1.00); ABS; Cm (5:20)

1: TOF MS ES-

3.18e+004

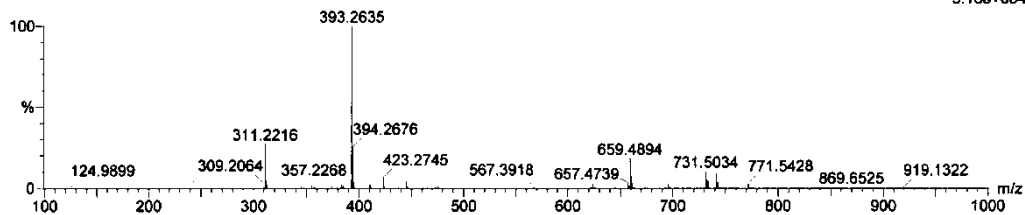

Minimum:

Maximum: 5.0 5.0 -1.5

50.0

| Mass     | Calc. Mass | mDa  | PPM  | DBE | i-FIT | i-FIT (Norm) | Formula    |
|----------|------------|------|------|-----|-------|--------------|------------|
| 393.2635 | 393.2641   | -0.6 | -1.5 | 5.5 | 165.7 | 0.0          | C23 H37 O5 |

Figure S27. IR spectrum of horipenoid A (3)

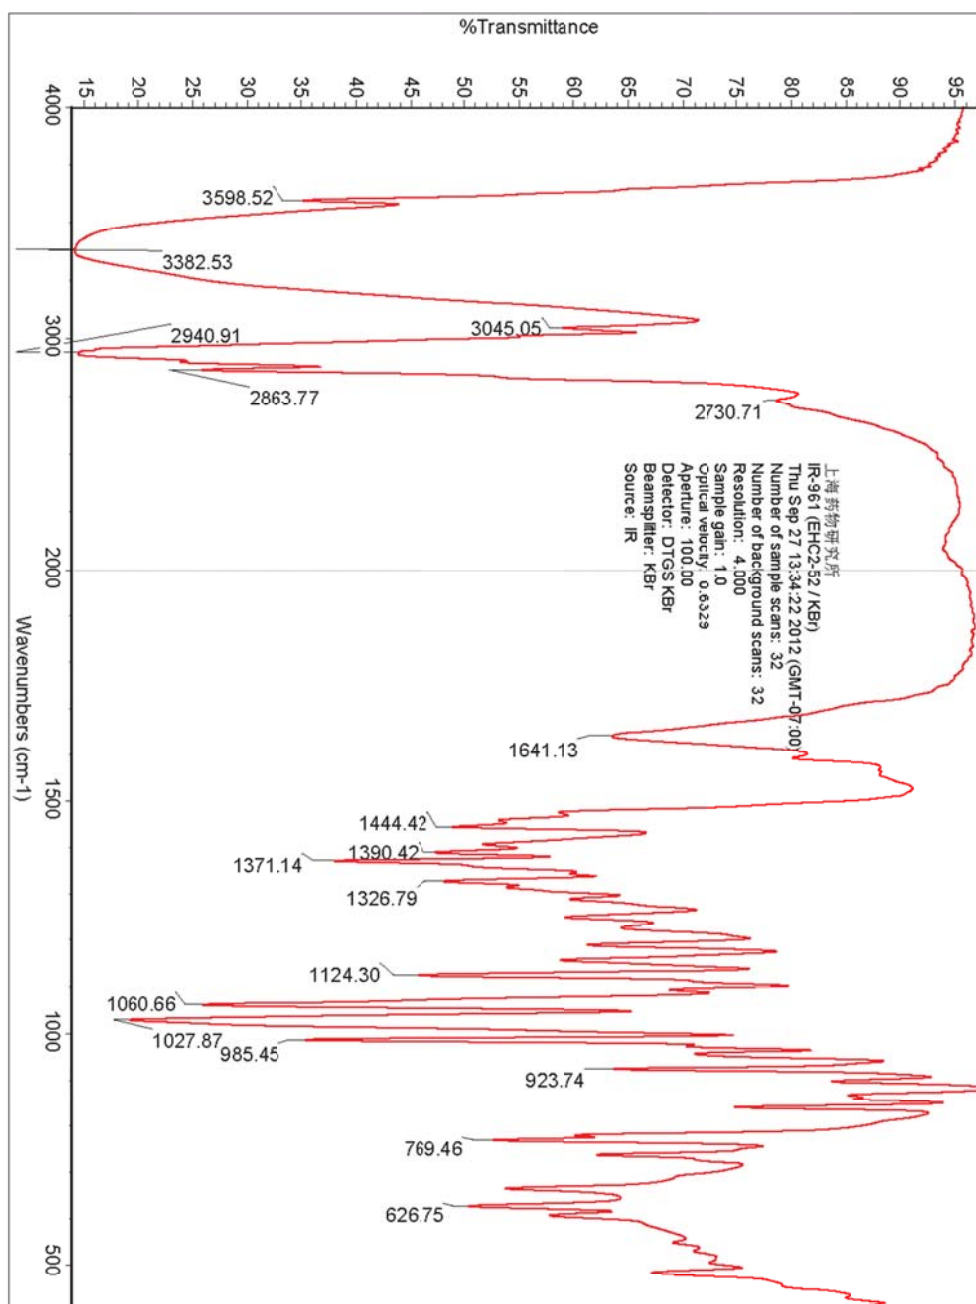





**Figure S29.**  $^{13}\text{C}$  NMR spectrum of horipenoid D (**4**) in  $\text{CDCl}_3$

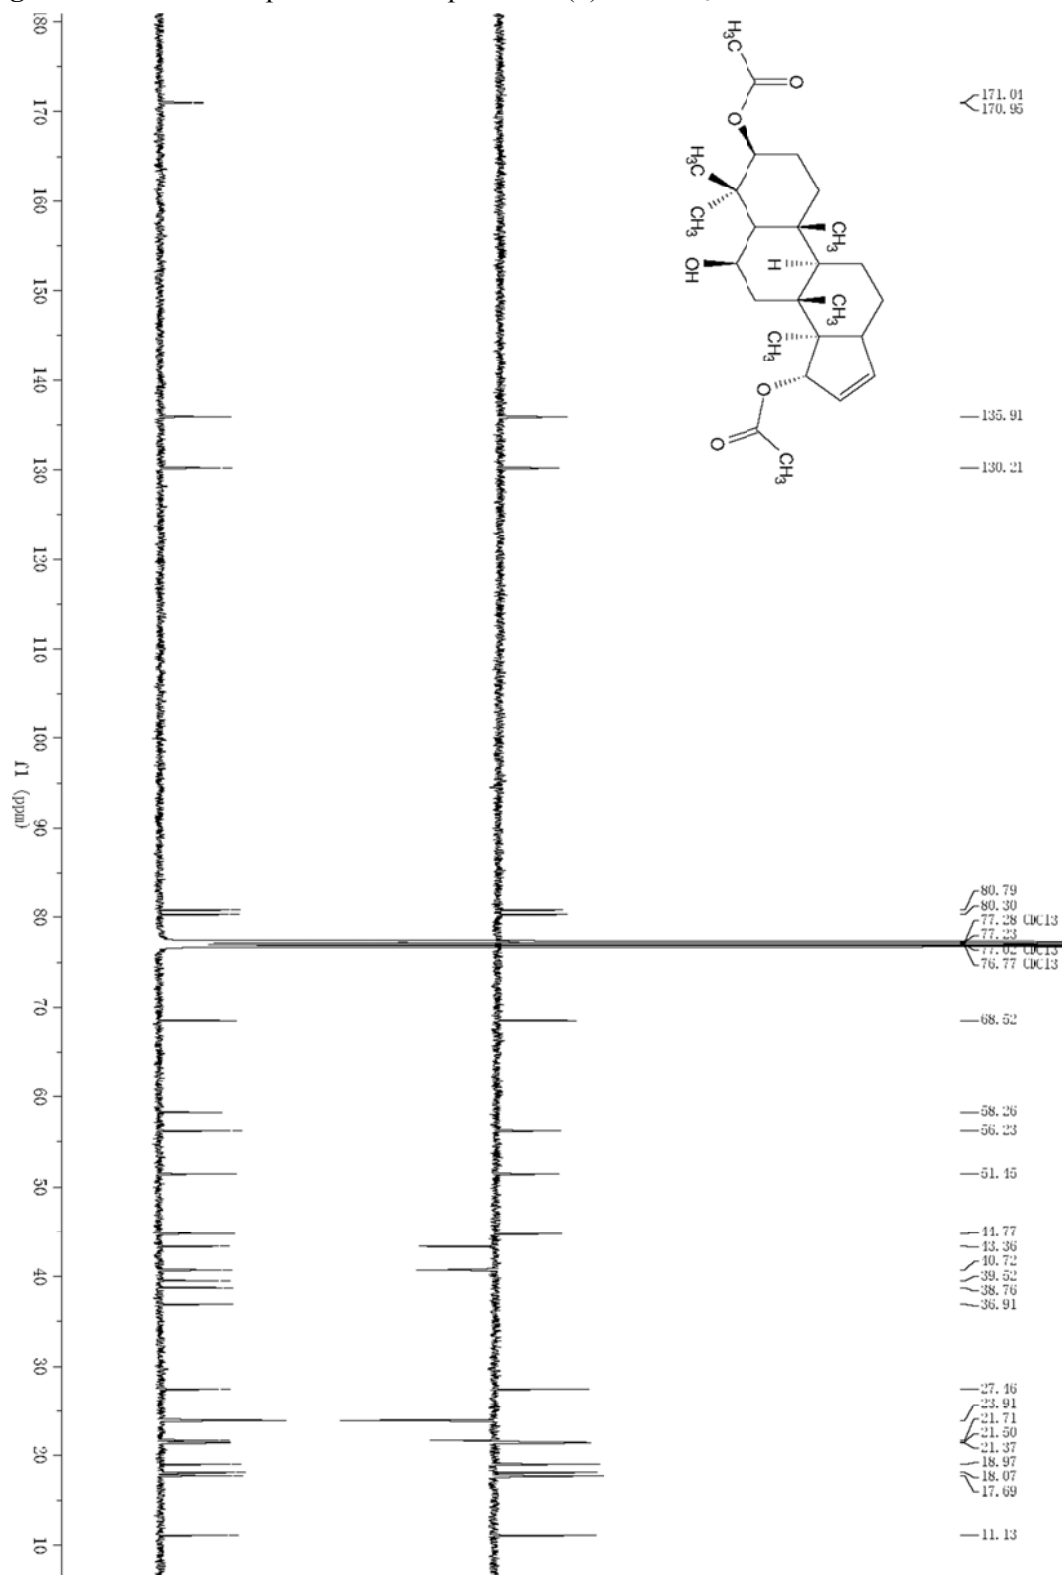

**Figure S30.** HSQC spectrum of horipenoid D (**4**) in CDCl<sub>3</sub>

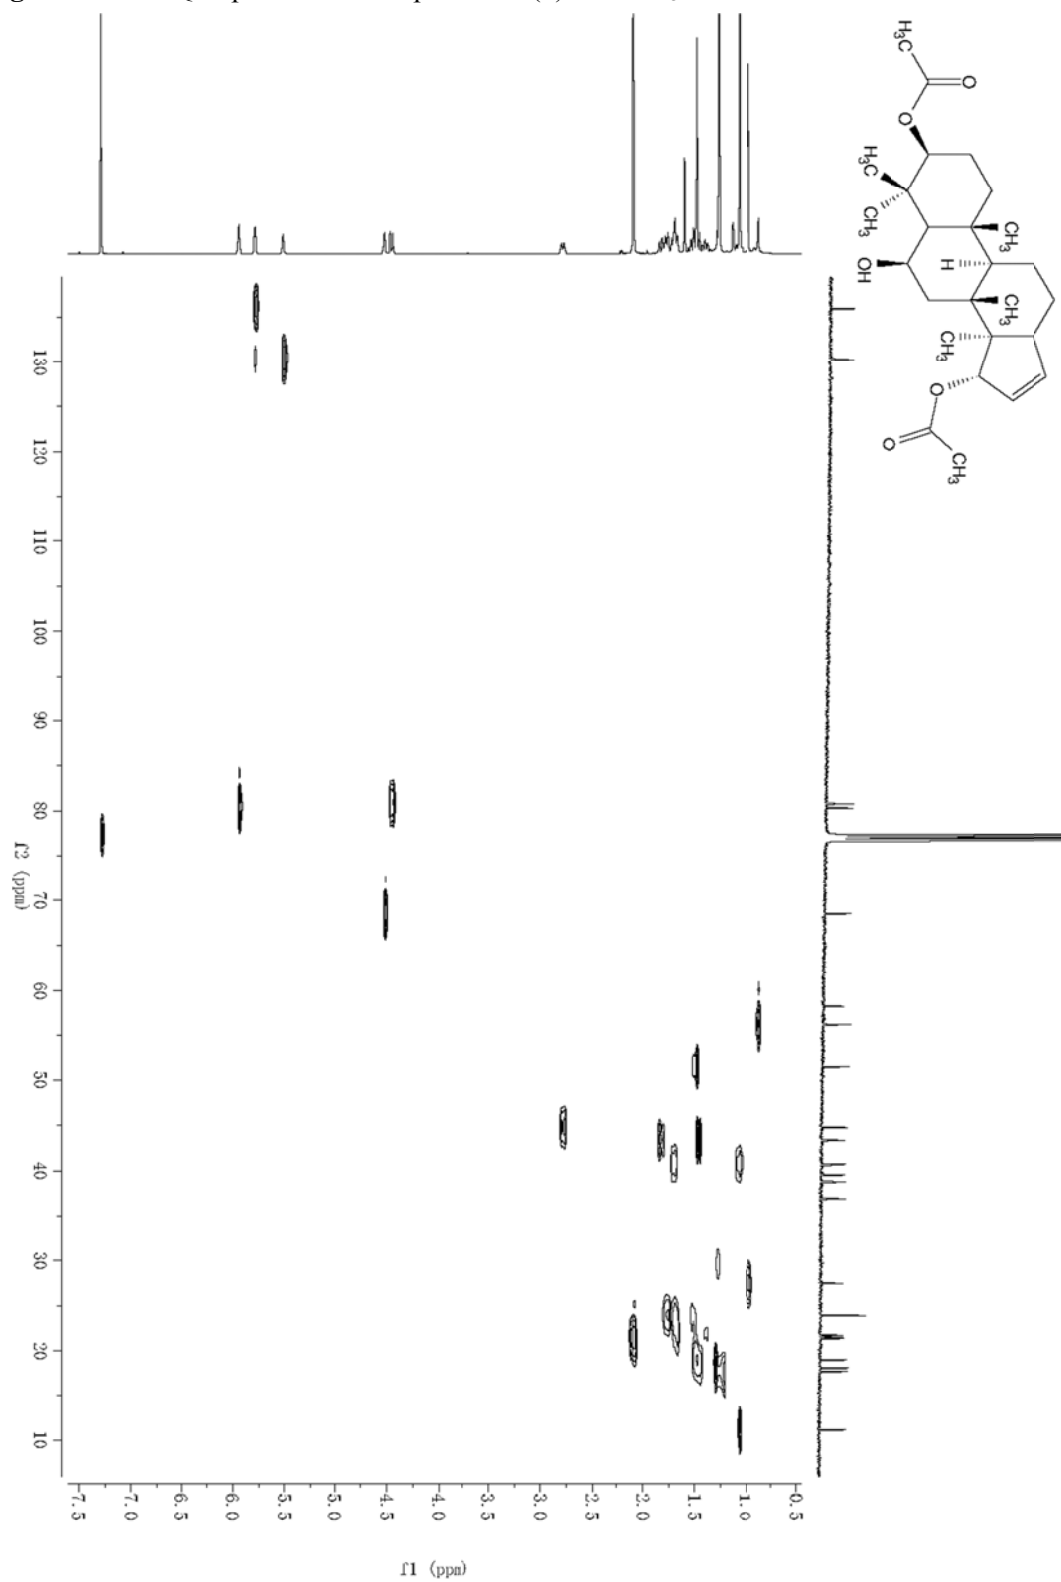

**Figure S31.** HMBC spectrum of horipenoid D (**4**) in CDCl<sub>3</sub>

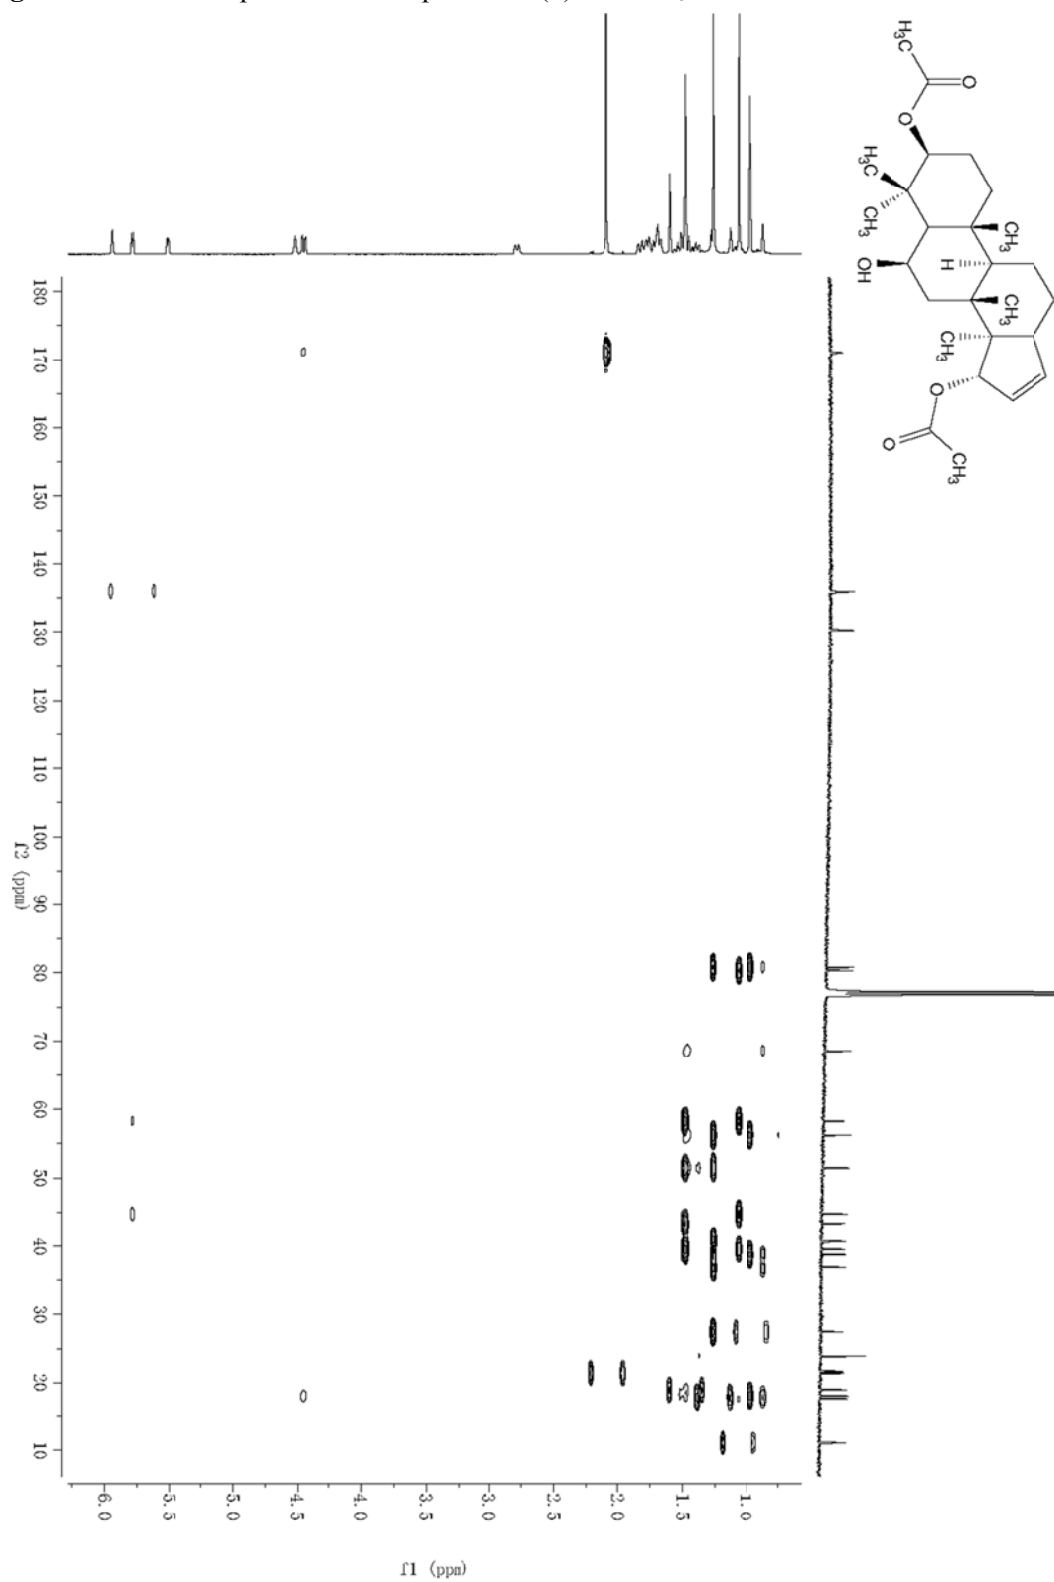

Figure S32. ESI(+)MS spectrum of horipenoid D (4)

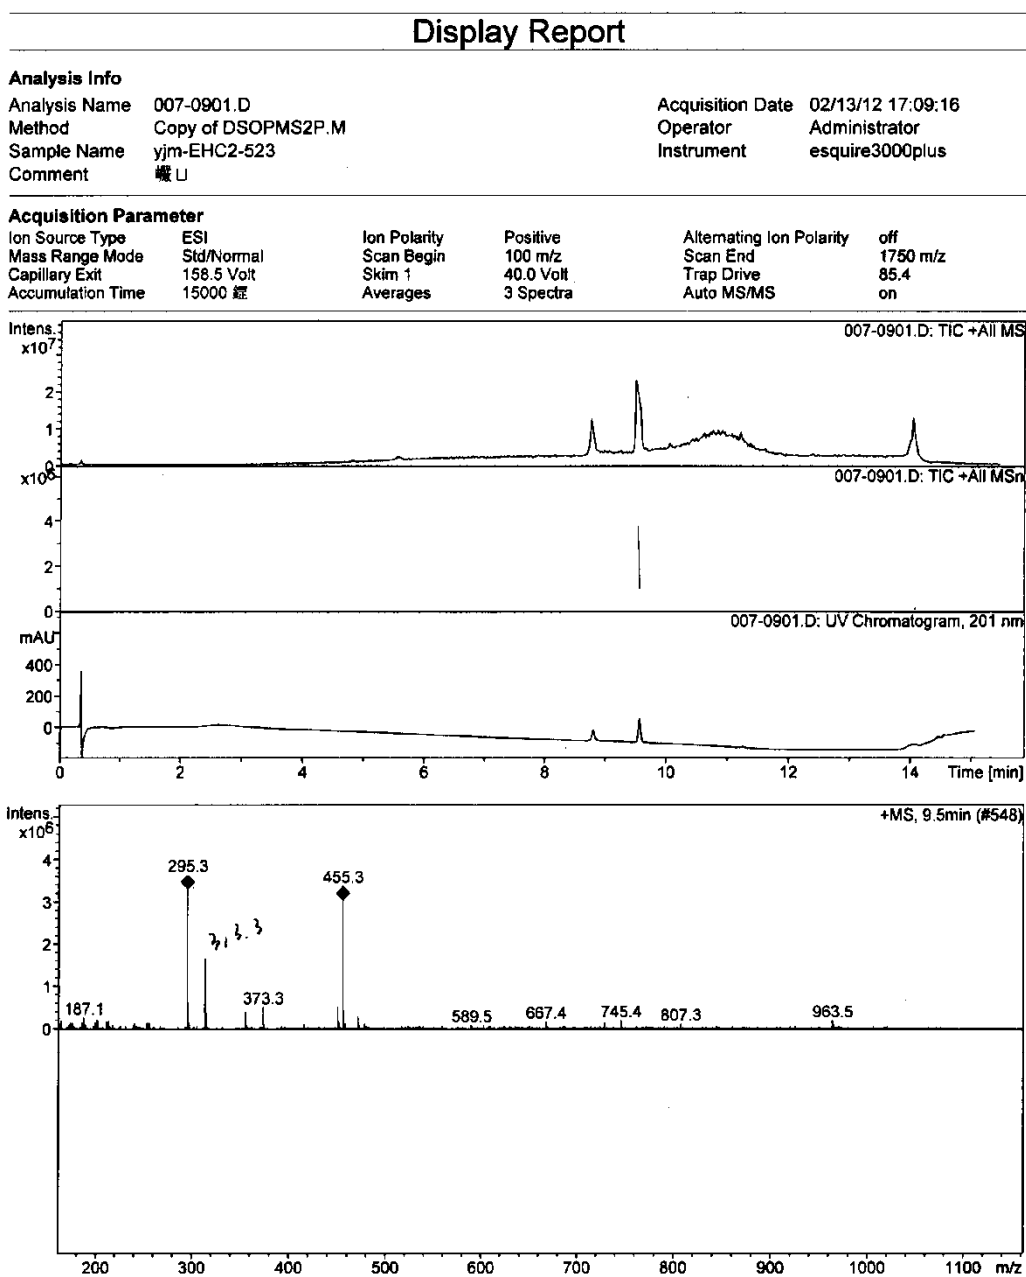

Figure S33. HRESI(-)MS spectrum of horipenoid D (4)

Elemental Composition Report

Single Mass Analysis

Tolerance = 10.0 PPM / DBE: min = -1.5, max = 50.0

Element prediction: Off

Number of isotope peaks used for i-FIT = 3

Monoisotopic Mass, Even Electron Ions

109 formula(e) evaluated with 1 results within limits (up to 50 best isotopic matches for each mass)

Elements Used:

C: 10-80 H: 1-110 O: 0-30

EHC2-523

LCT PXE KE324

09-Mar-2012

15:28:04

EHC2-523\_20120309 31 (0.671) AM2 (Ar,10000.0,0.00,1.00); ABS; Cm (25:48)

1: TOF MS ES-  
1.35e+004

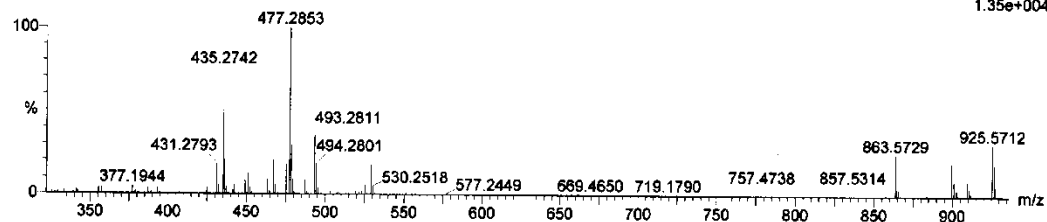

Minimum: -1.5  
Maximum: 5.0 10.0 50.0

| Mass     | Calc. Mass | mDa | PPM | DBE | i-FIT | i-FIT (Norm) | Formula    |
|----------|------------|-----|-----|-----|-------|--------------|------------|
| 477.2853 | 477.2852   | 0.1 | 0.2 | 7.5 | 125.8 | 0.0          | C27 H41 O7 |

Figure S34. IR spectrum of horipenoid D (4)

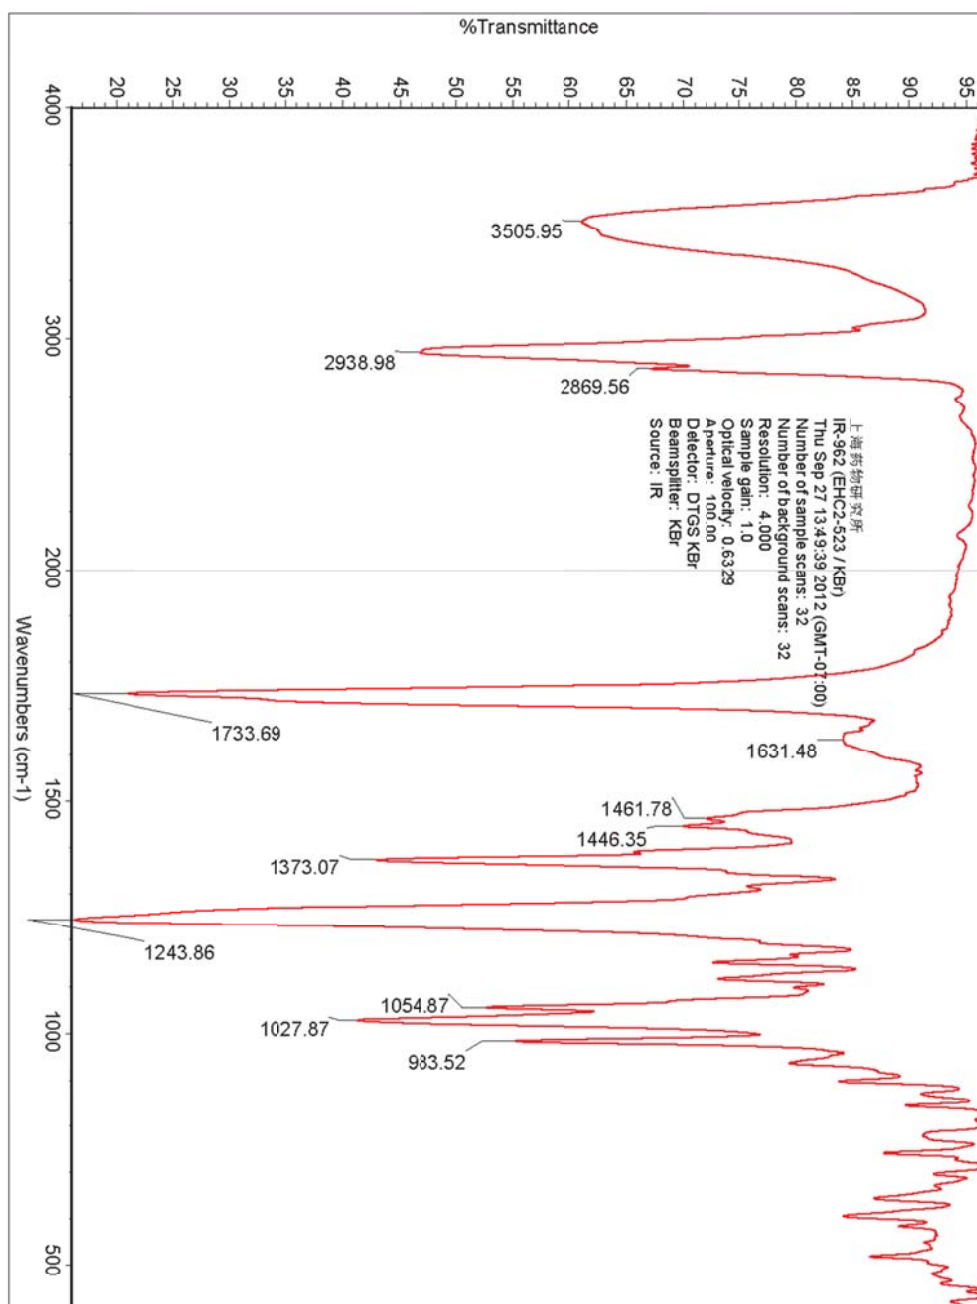

**Figure S35.**  $^1\text{H}$  NMR spectrum of horipenoid E (**5**) in  $\text{C}_5\text{D}_5\text{N}$

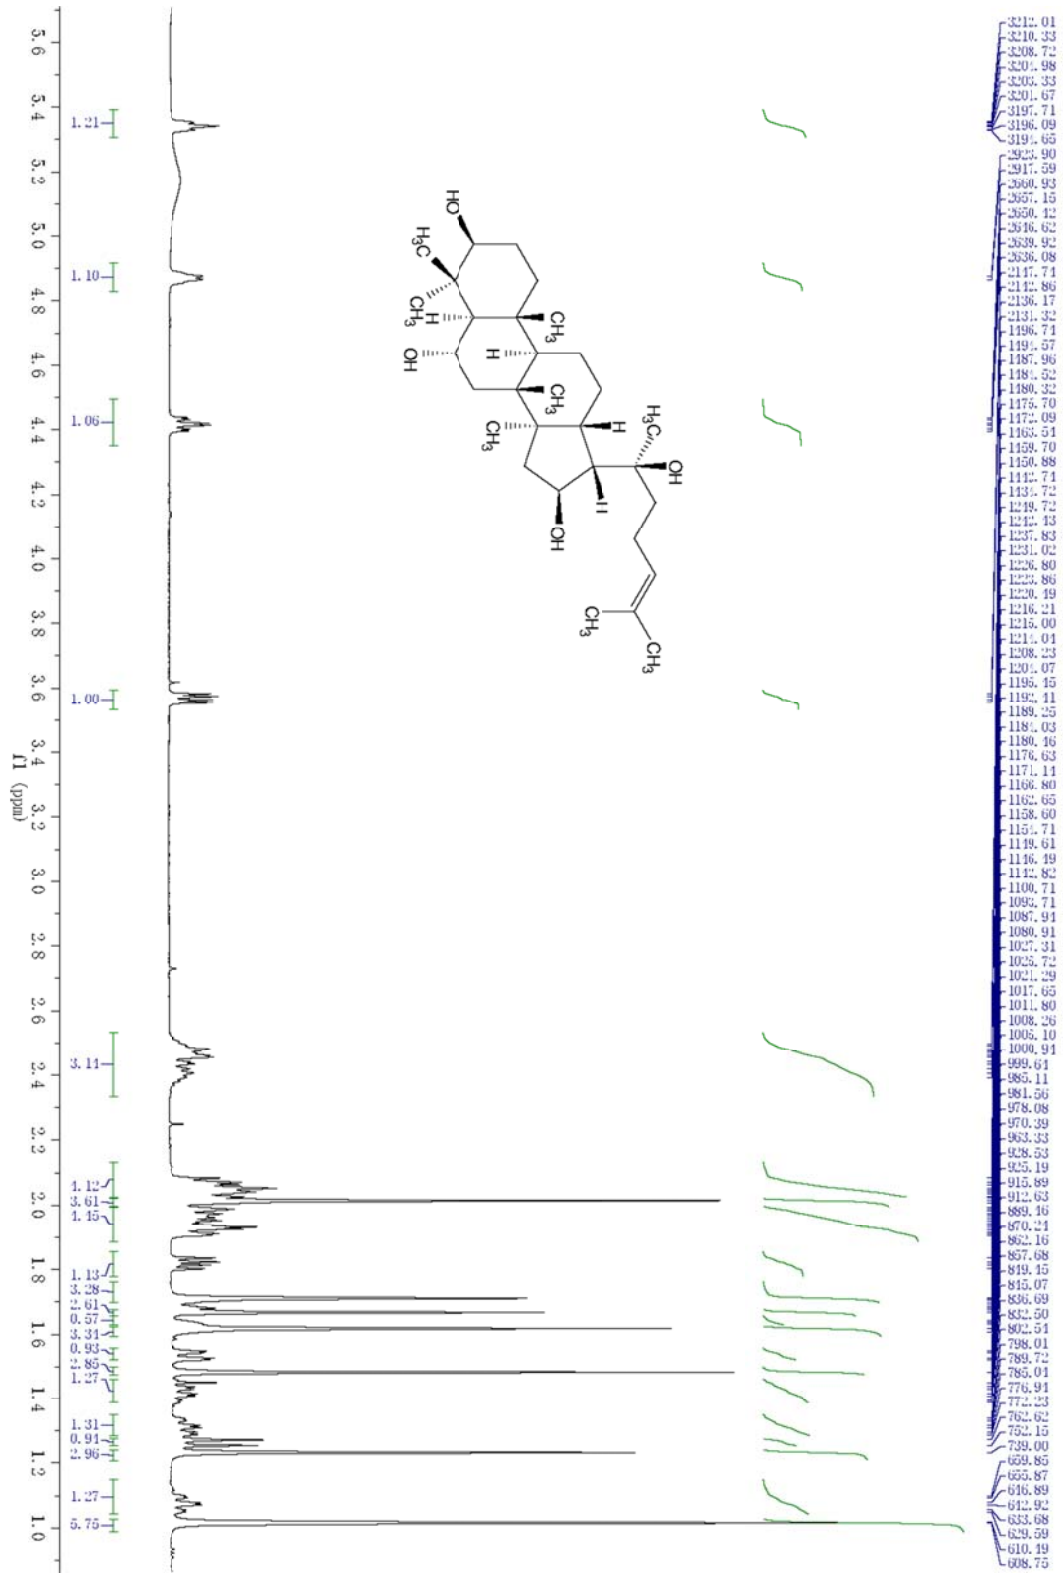



**Figure S36.**  $^{13}\text{C}$  NMR spectrum of horipenoid E (**5**) in  $\text{C}_5\text{D}_5\text{N}$

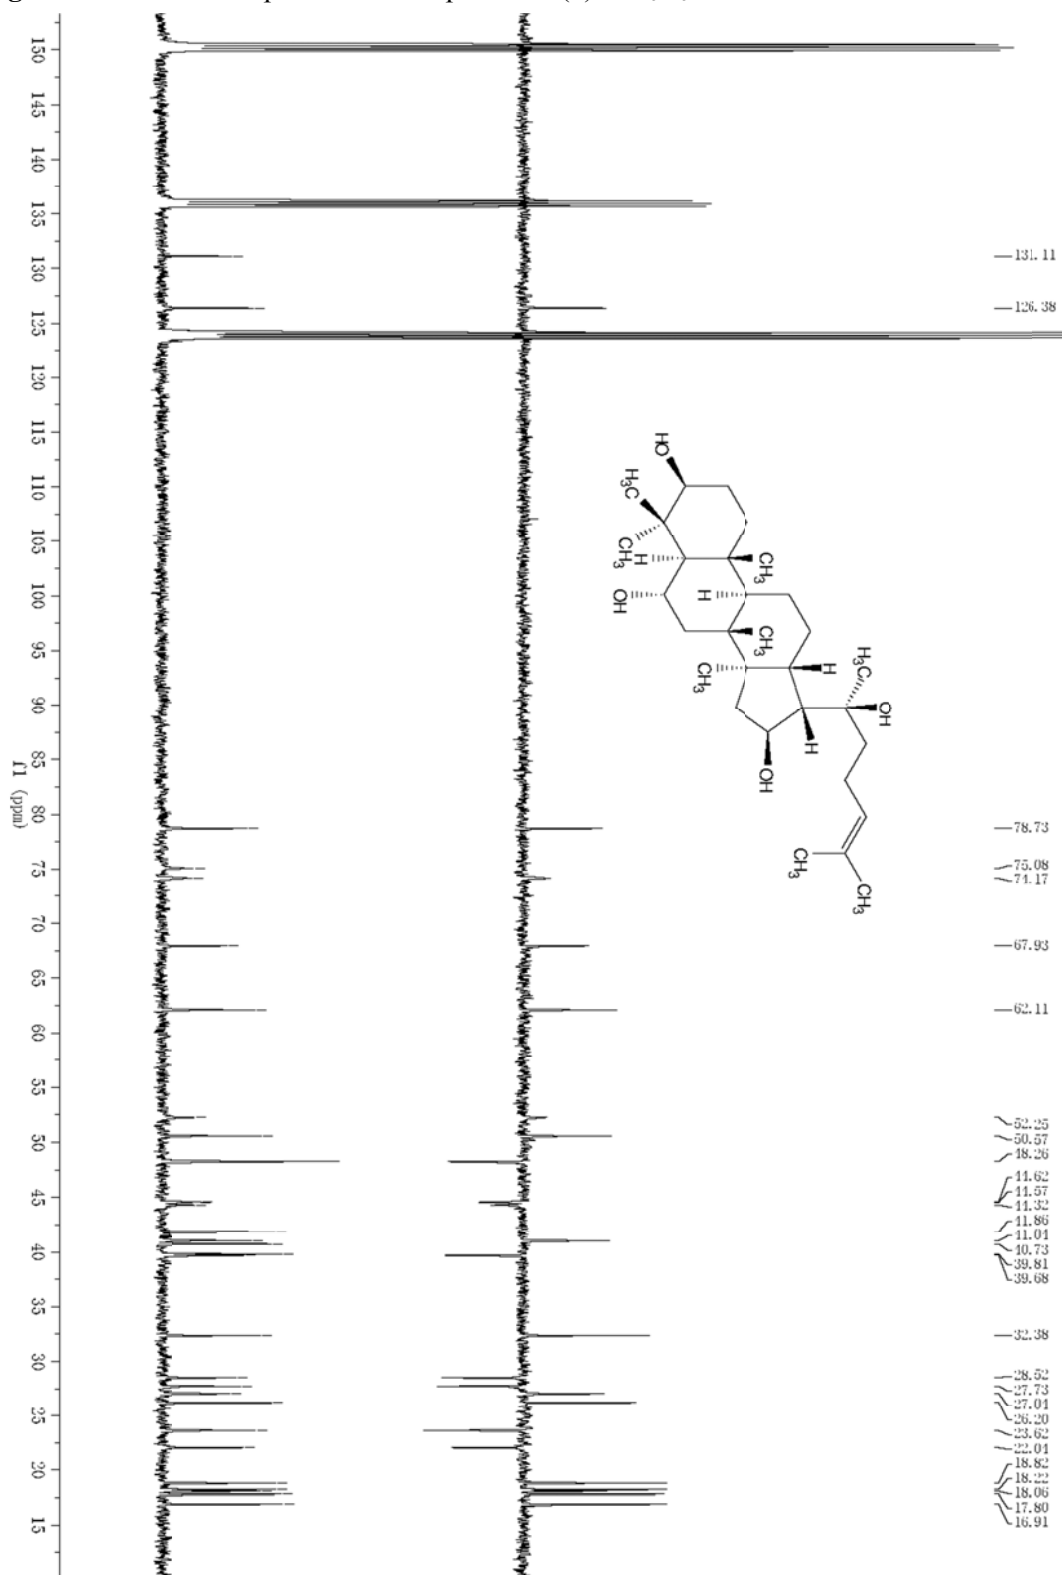

**Figure S37.**  $^1\text{H}$ - $^1\text{H}$ HCOSY spectrum of horipenoid E (**5**) in  $\text{C}_5\text{D}_5\text{N}$

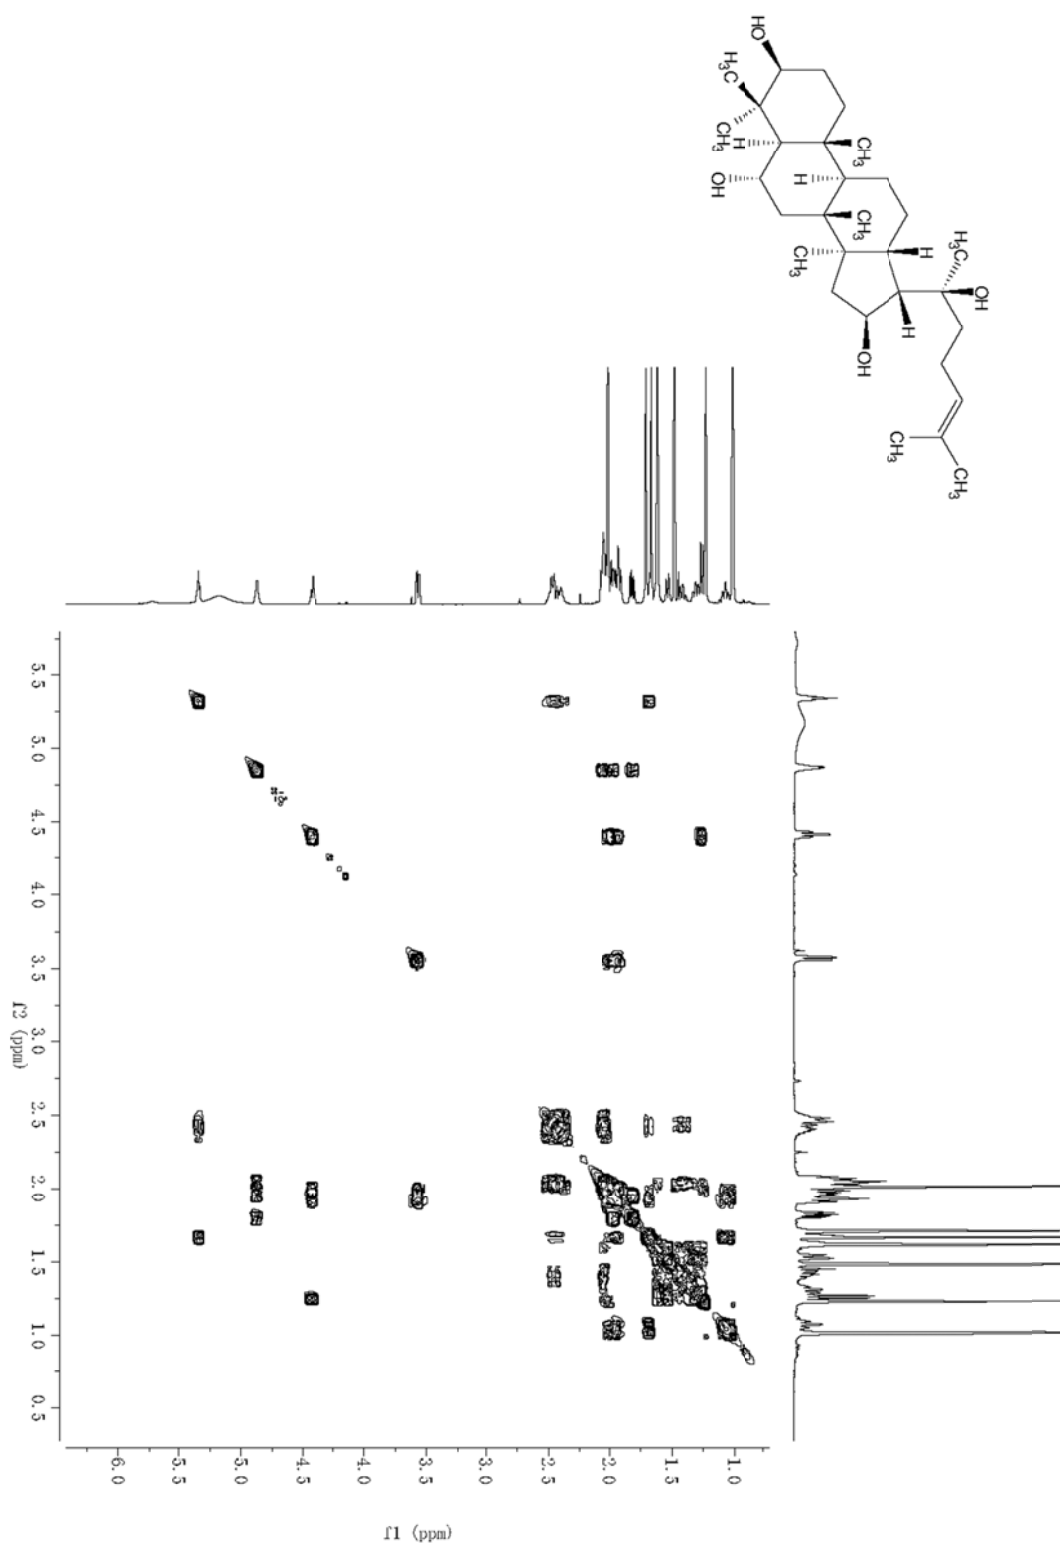

**Figure S38.** HSQC spectrum of horipenoid E (**5**) in  $C_5D_5N$

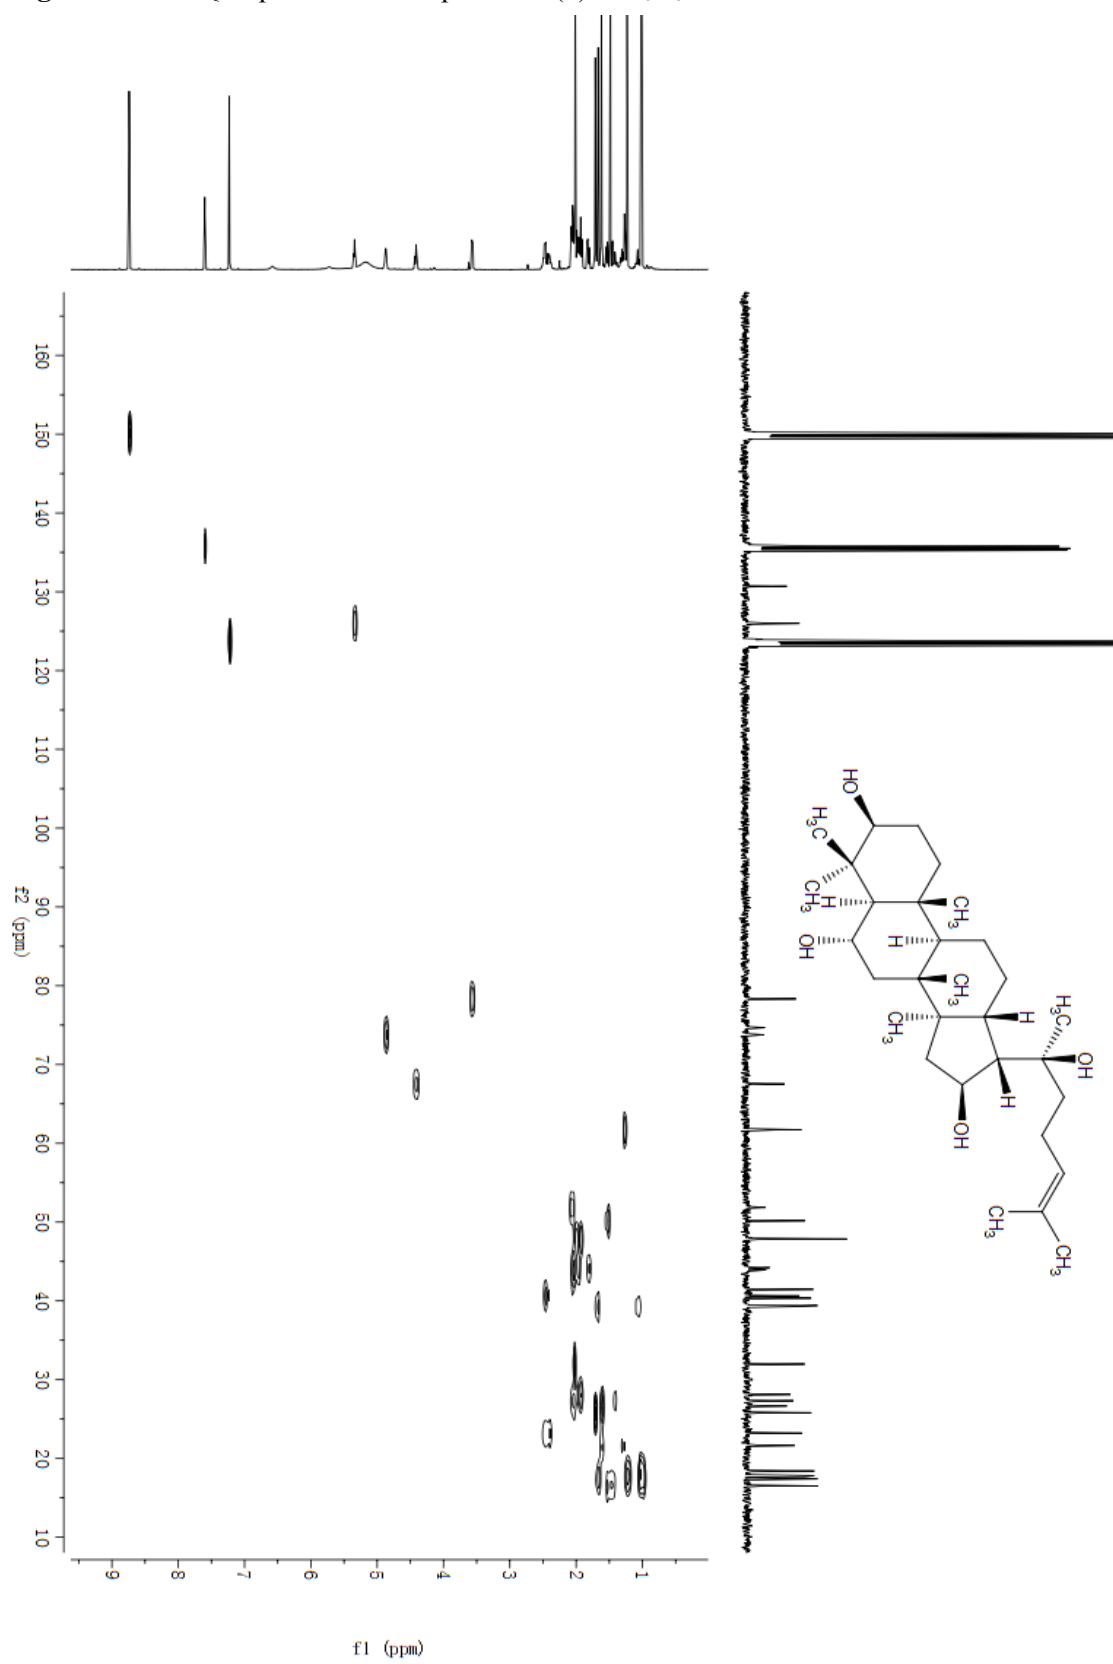

**Figure S39.** HMBC spectrum of horipenoid E (**5**) in  $C_5D_5N$

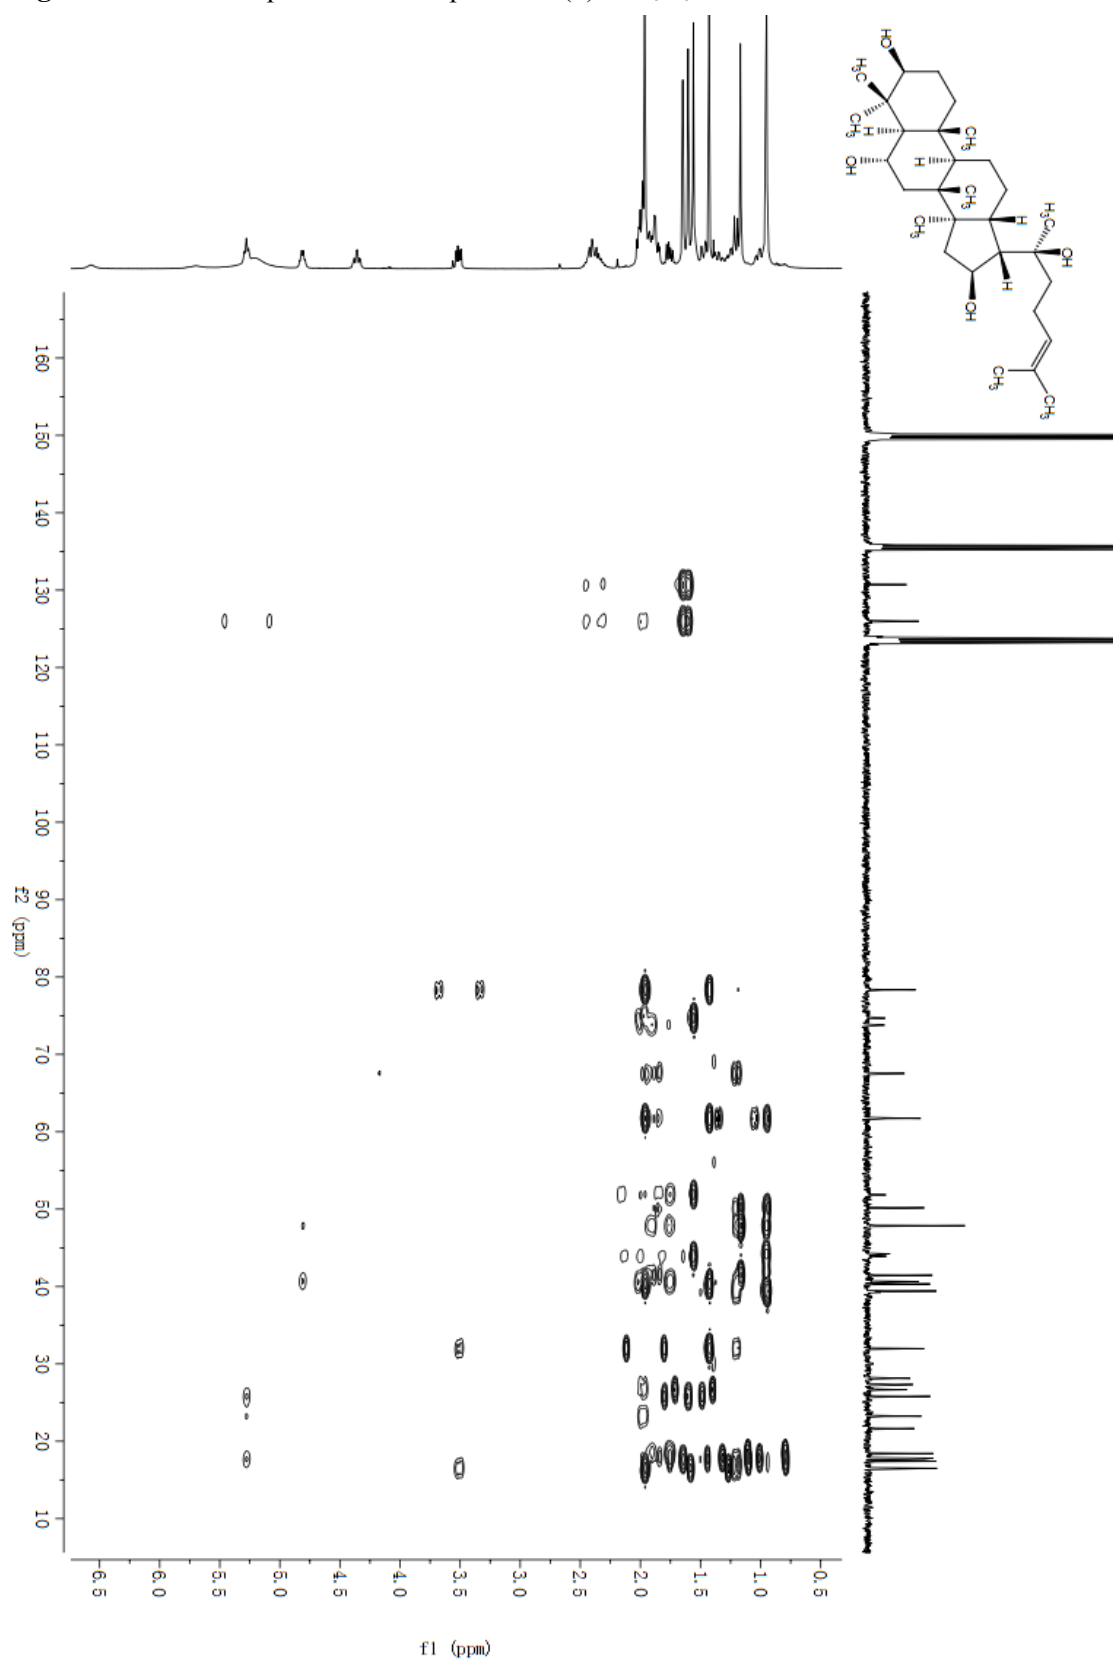

Figure S40. ROESY spectrum of horipenoid E (5) in C<sub>5</sub>D<sub>5</sub>N

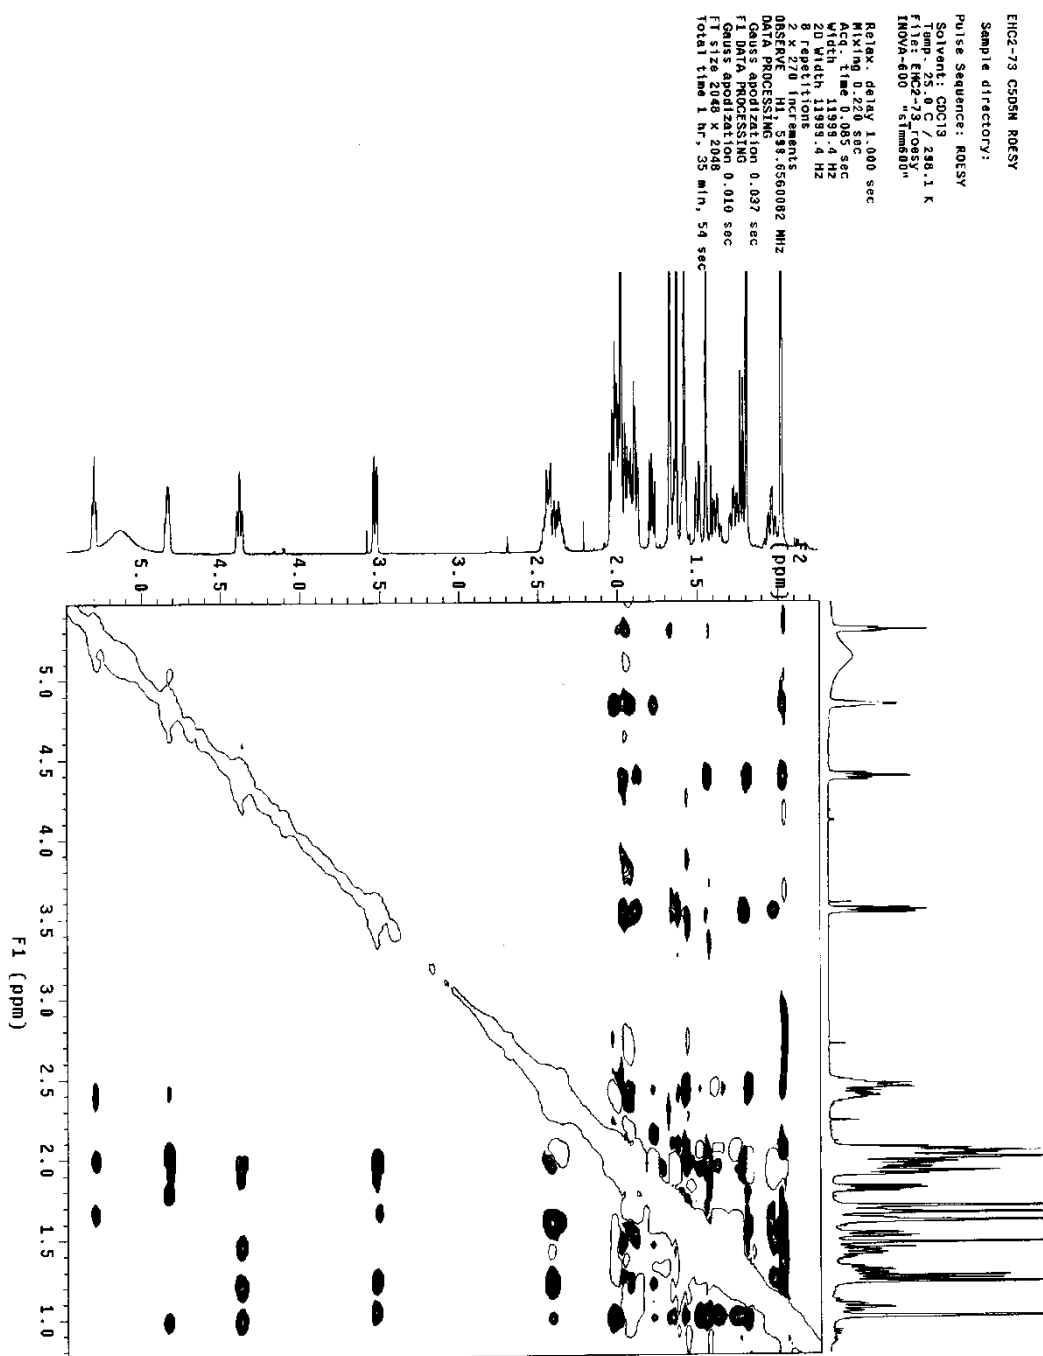

Figure S41. ESI(+)MS spectrum of horipenoid E (5)

### Display Report

#### Analysis Info

Analysis Name 010-1201.D  
Method Copy of DSOPMS2P.M  
Sample Name yjm-EHC2-73  
Comment W

Acquisition Date 12/29/11 16:21:06  
Operator Administrator  
Instrument esquire3000plus

#### Acquisition Parameter

|                   |            |              |           |                          |          |
|-------------------|------------|--------------|-----------|--------------------------|----------|
| Ion Source Type   | ESI        | Ion Polarity | Positive  | Alternating Ion Polarity | off      |
| Mass Range Mode   | Std/Normal | Scan Begin   | 100 m/z   | Scan End                 | 1750 m/z |
| Capillary Exit    | 158.5 Volt | Skim 1       | 40.0 Volt | Trap Drive               | 85.4     |
| Accumulation Time | 15000 纒    | Averages     | 3 Spectra | Auto MS/MS               | on       |

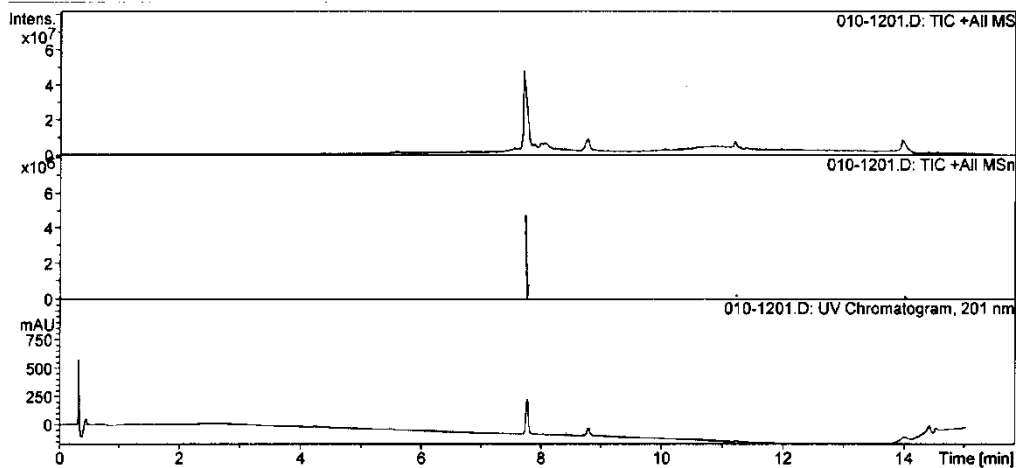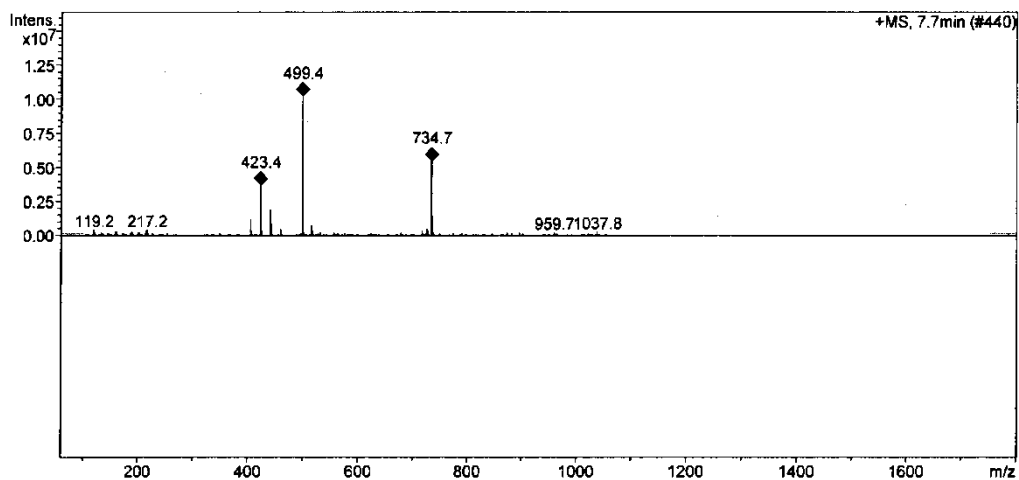

Figure S42. ESI(-)MS spectrum of horipenoid E (5)

### Display Report

#### Analysis Info

Analysis Name 010-2401.D  
Method Copy of DSOPMS2N.M  
Sample Name yjm-EHC2-73  
Comment W

Acquisition Date 12/29/11 19:36:43  
Operator Administrator  
Instrument esquire3000plus

#### Acquisition Parameter

|                   |             |              |            |                          |          |
|-------------------|-------------|--------------|------------|--------------------------|----------|
| Ion Source Type   | ESI         | Ion Polarity | Negative   | Alternating Ion Polarity | off      |
| Mass Range Mode   | Std/Normal  | Scan Begin   | 100 m/z    | Scan End                 | 1750 m/z |
| Capillary Exit    | -158.5 Volt | Skim 1       | -40.0 Volt | Trap Drive               | 92.9     |
| Accumulation Time | 15000 經     | Averages     | 3 Spectra  | Auto MS/MS               | on       |

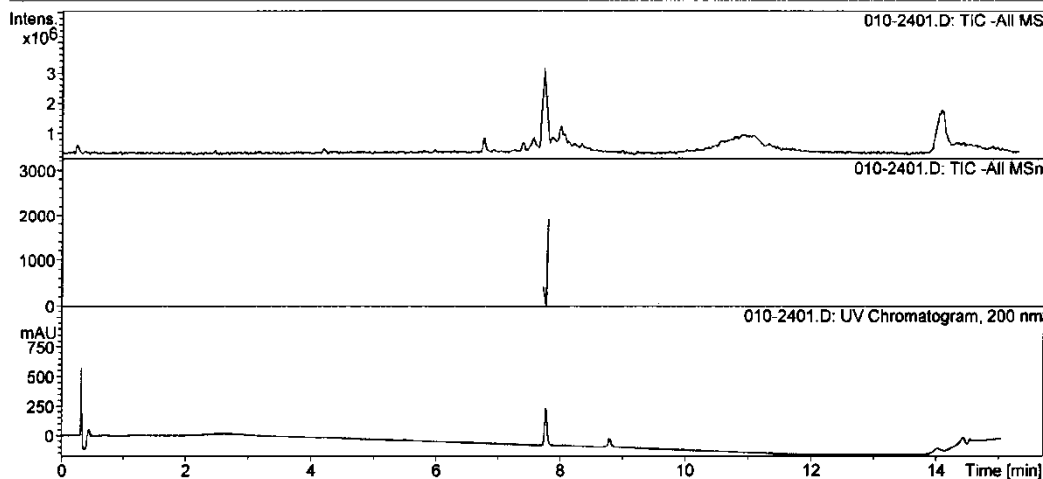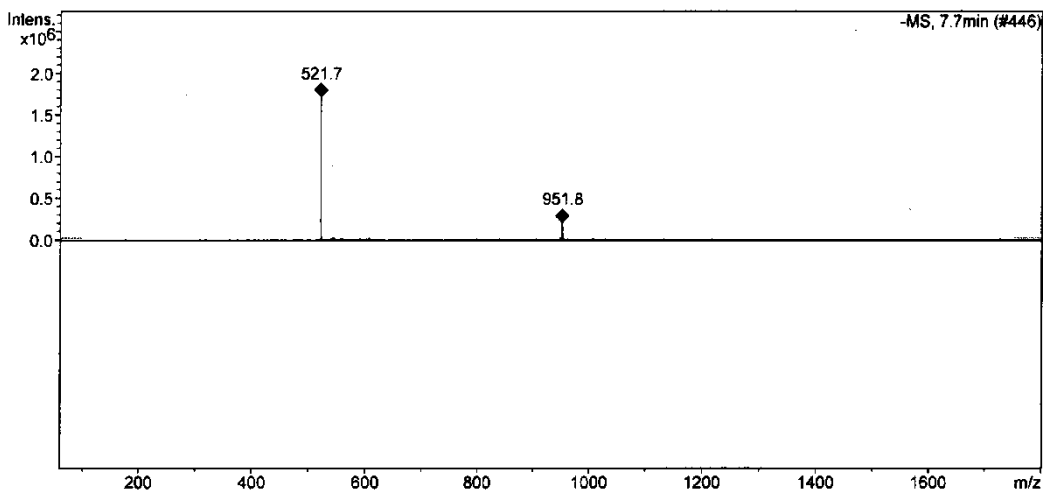

Figure S43. HRESI(-)MS spectrum of horipenoid E (5)

Elemental Composition Report

Single Mass Analysis

Tolerance = 5.0 PPM / DBE: min = -1.5, max = 50.0

Element prediction: Off

Number of isotope peaks used for i-FIT = 3

Monoisotopic Mass, Even Electron Ions

126 formula(e) evaluated with 1 results within limits (up to 50 best isotopic matches for each mass)

Elements Used:

C: 10-50 H: 1-80 O: 0-30

EHC2-73

LCT PXE KE324

09-Mar-2012

14:11:59

1: TOF MS ES-

2.01e+004

997.7780

EHC2-73\_20120309 24 (0.512) AM2 (Ar:10000.0,0.00,1.00); ABS; Cm (6:25)

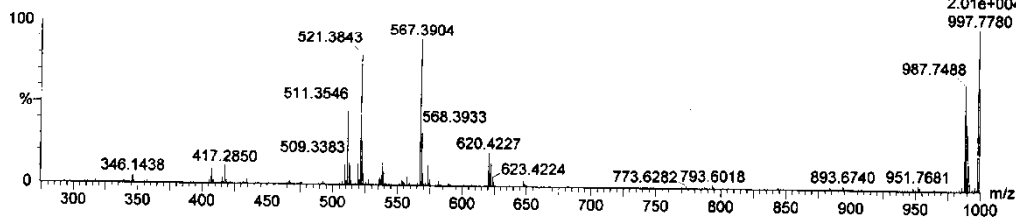

Minimum: -1.5  
Maximum: 50.0

| Mass     | Calc. Mass | mDa | PPM | DBE | i-FIT | i-FIT (Norm) | Formula    |
|----------|------------|-----|-----|-----|-------|--------------|------------|
| 521.3843 | 521.3842   | 0.1 | 0.2 | 5.5 | 135.3 | 0.0          | C31 H53 O6 |



Figure S44. IR spectrum of horipenoid E (5)

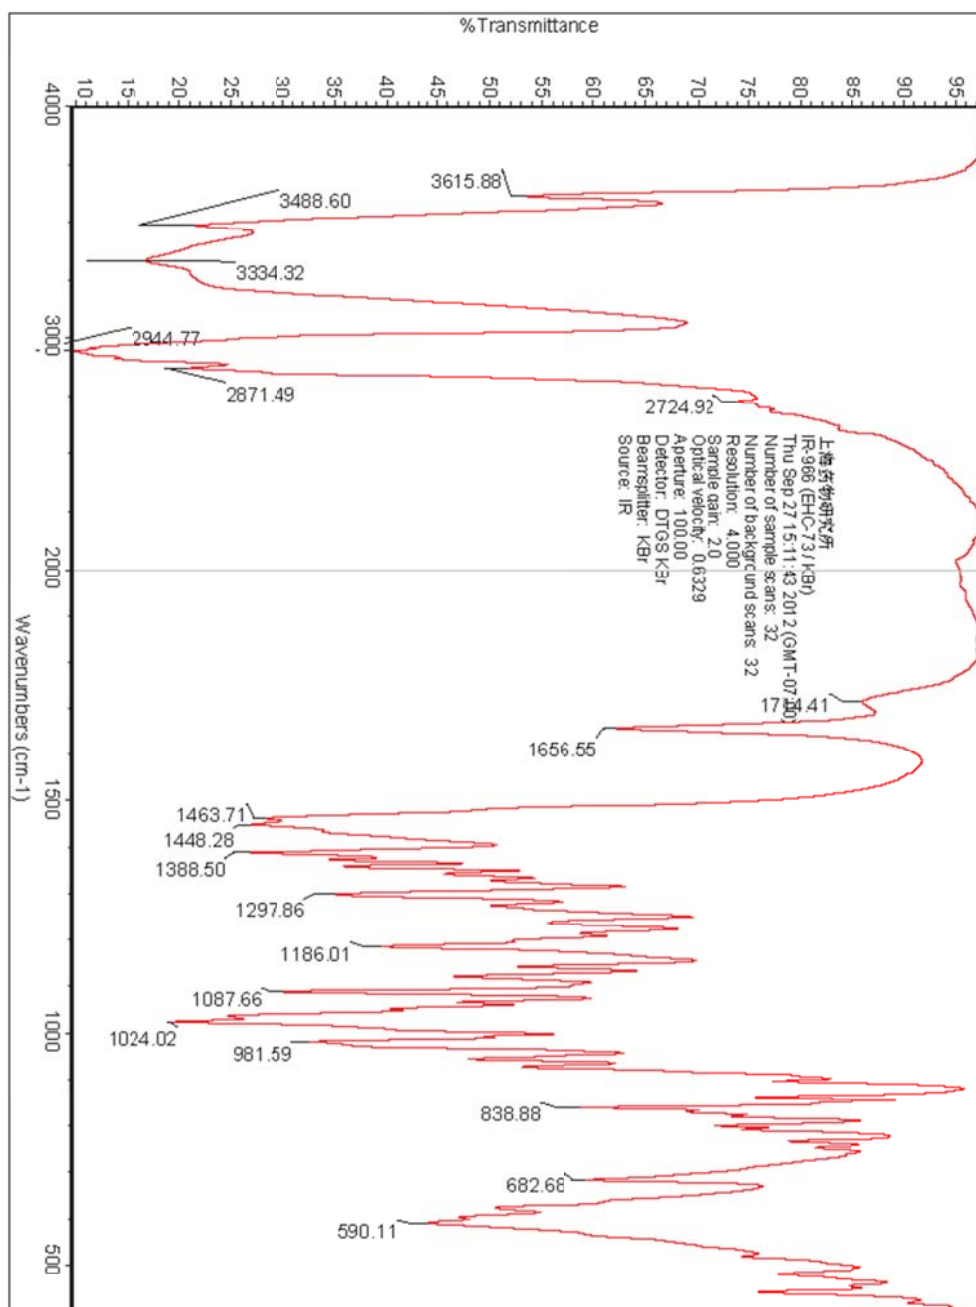

**Figure S45.**  $^1\text{H}$  NMR spectrum of horipenoid F (**6**) in  $\text{C}_5\text{D}_5\text{N}$

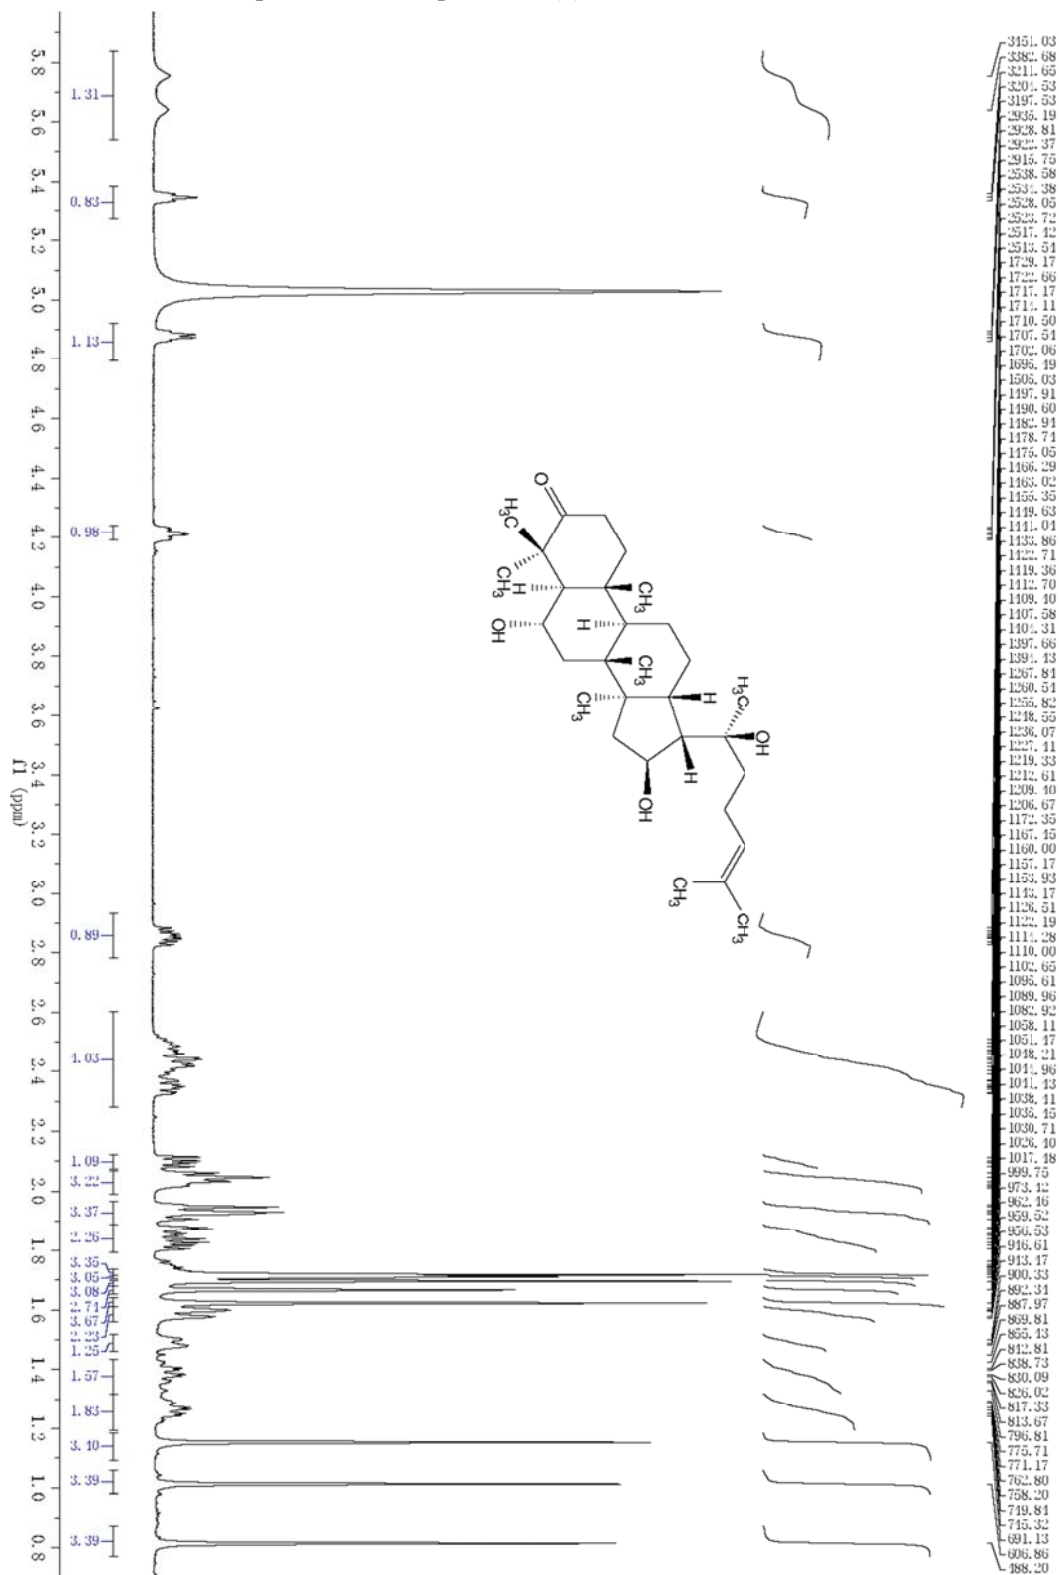

**Figure S46.**  $^{13}\text{C}$  NMR spectrum of horipenoid F (**6**) in  $\text{C}_5\text{D}_5\text{N}$

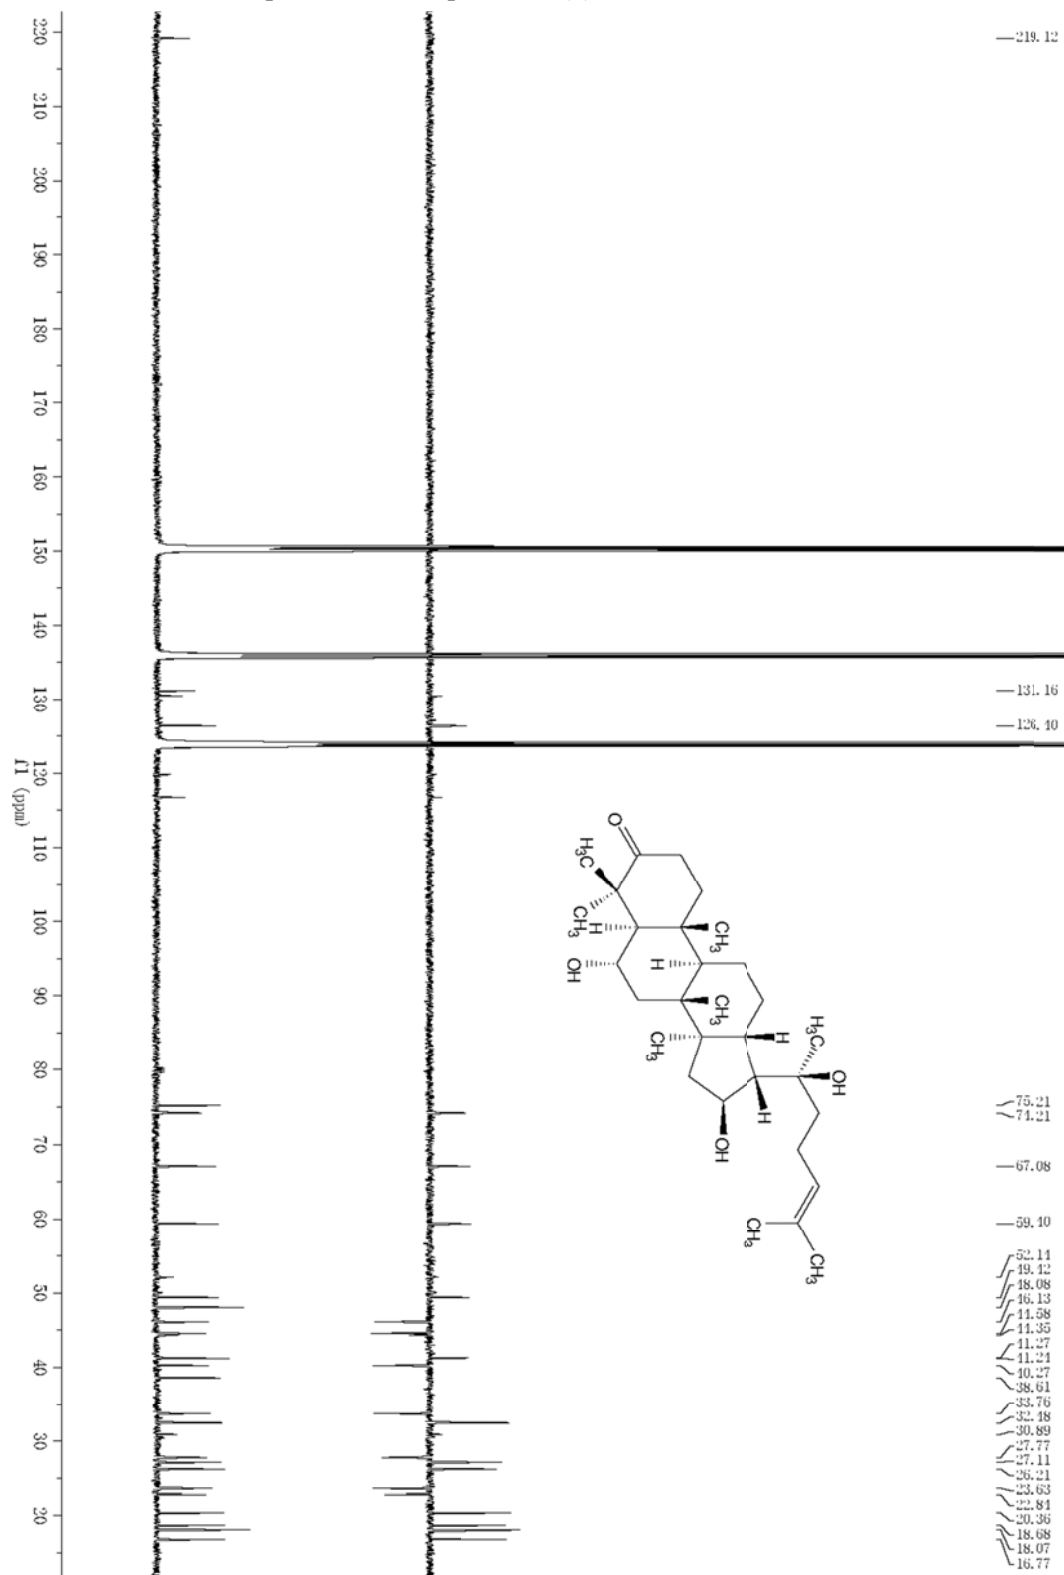

**Figure S47.** HSQC spectrum of horipenoid F (**6**) in C<sub>5</sub>D<sub>5</sub>N

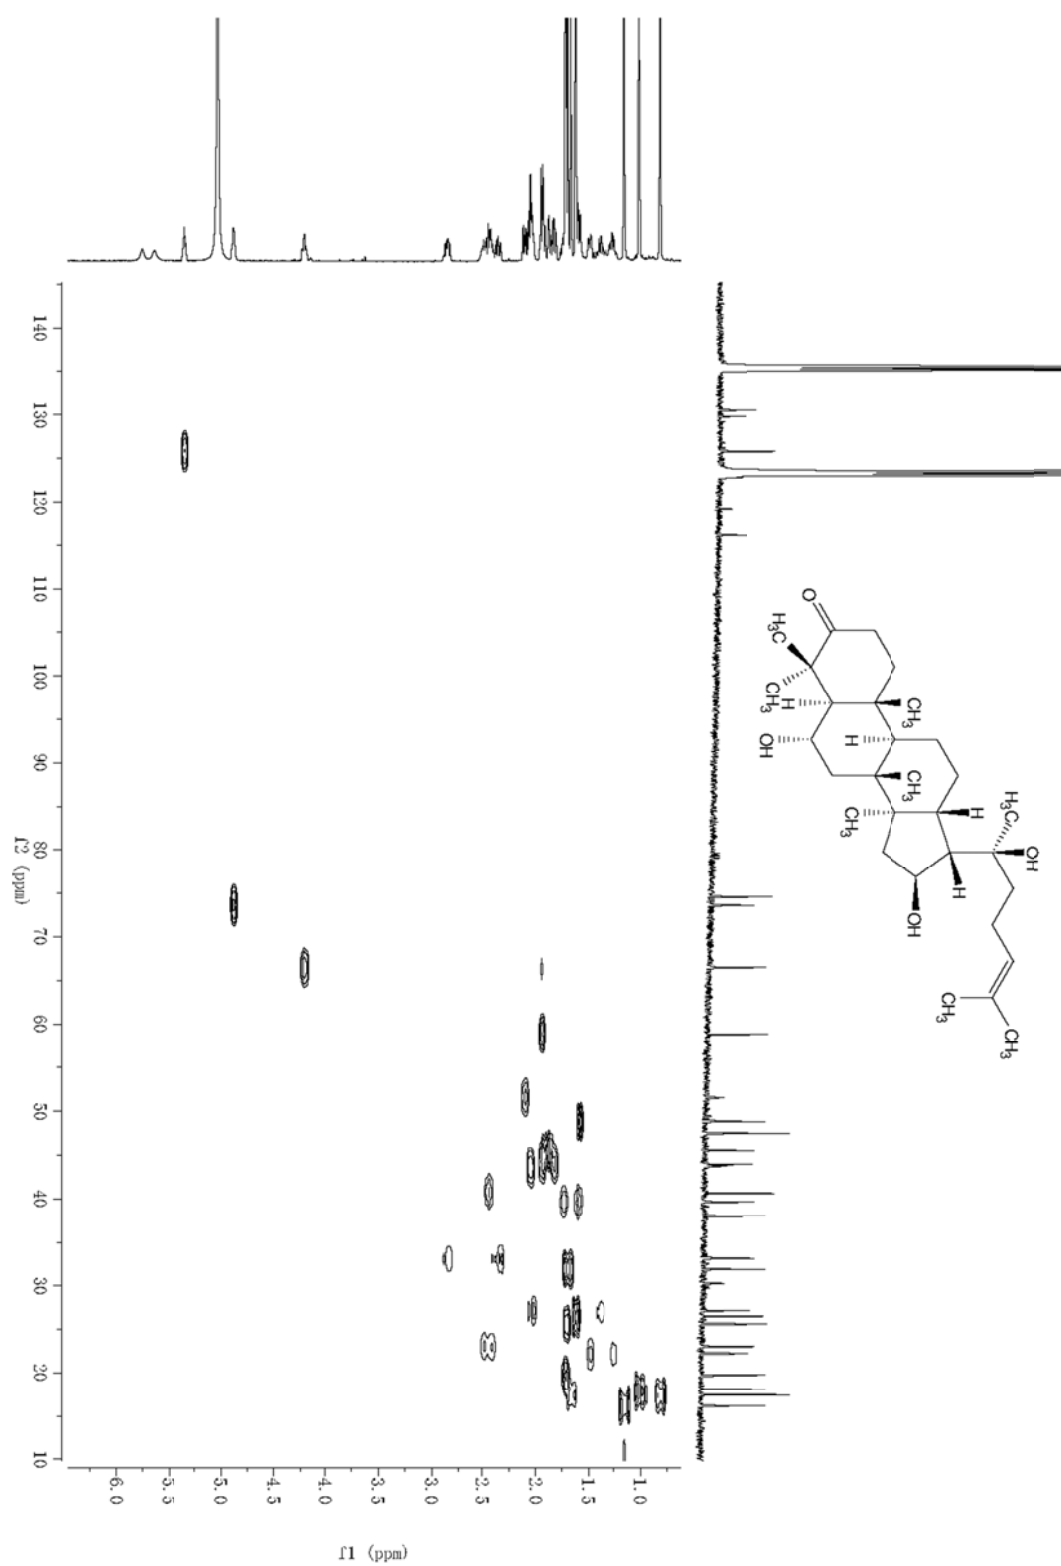

**Figure S48.** HMBC spectrum of horipenoid F (**6**) in  $C_5D_5N$

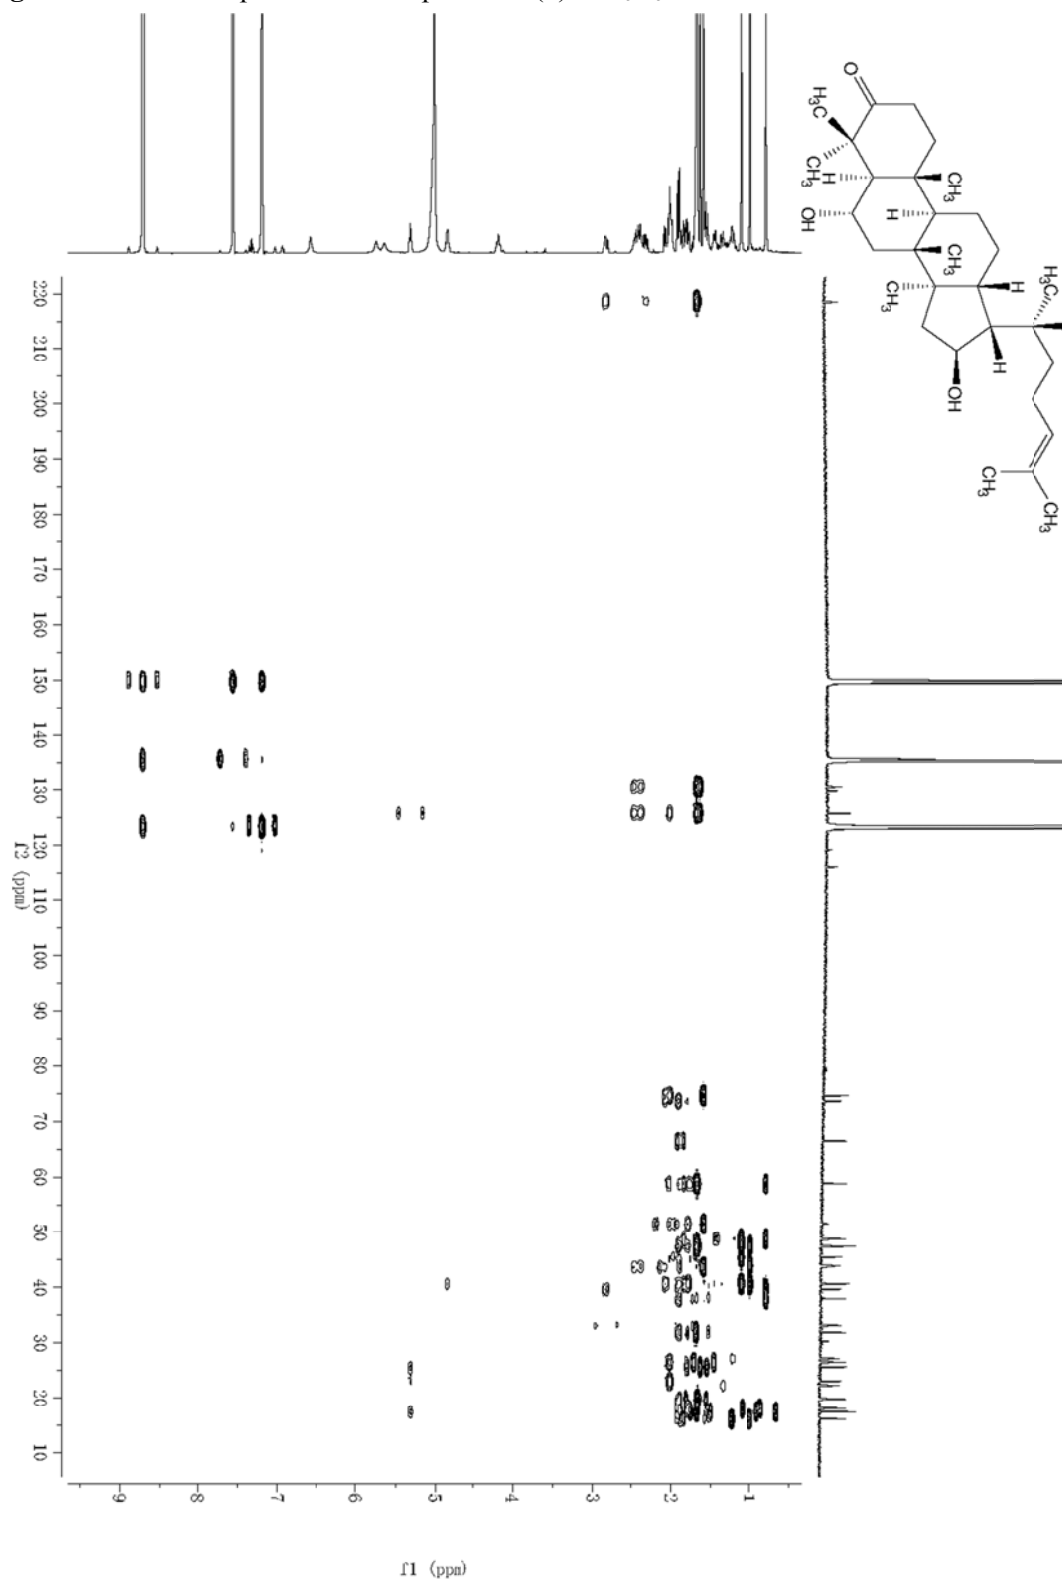

Figure S49. ROESY spectrum of horipenoid F (6) in C<sub>5</sub>D<sub>5</sub>N

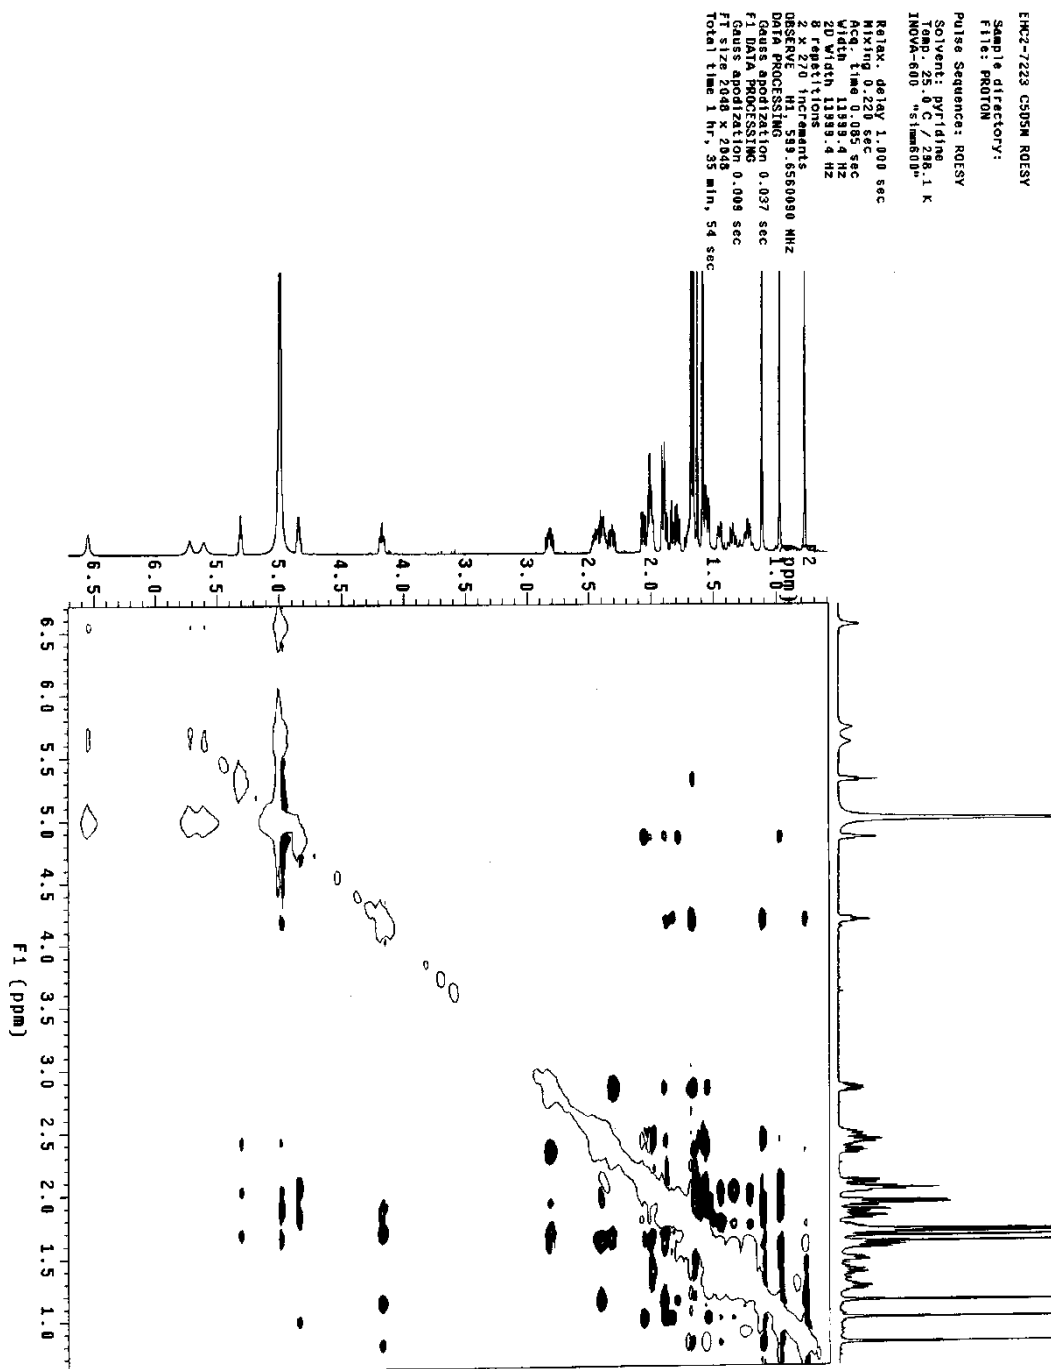

Figure S50 ESI(+)-MS spectrum of horipenoid F (6)

### Display Report

#### Analysis Info

Analysis Name 005-0701.D  
Method Copy of DSOPMS2P.M  
Sample Name yjm-EHC2-7223  
Comment

Acquisition Date 01/12/12 15:23:48  
Operator Administrator  
Instrument esquire3000plus

#### Acquisition Parameter

|                   |            |              |           |                          |          |
|-------------------|------------|--------------|-----------|--------------------------|----------|
| Ion Source Type   | ESI        | Ion Polarity | Positive  | Alternating Ion Polarity | off      |
| Mass Range Mode   | Std/Normal | Scan Begin   | 100 m/z   | Scan End                 | 1750 m/z |
| Capillary Exit    | 158.5 Volt | Skim 1       | 40.0 Volt | Trap Drive               | 85.4     |
| Accumulation Time | 15000 秒    | Averages     | 3 Spectra | Auto MS/MS               | on       |

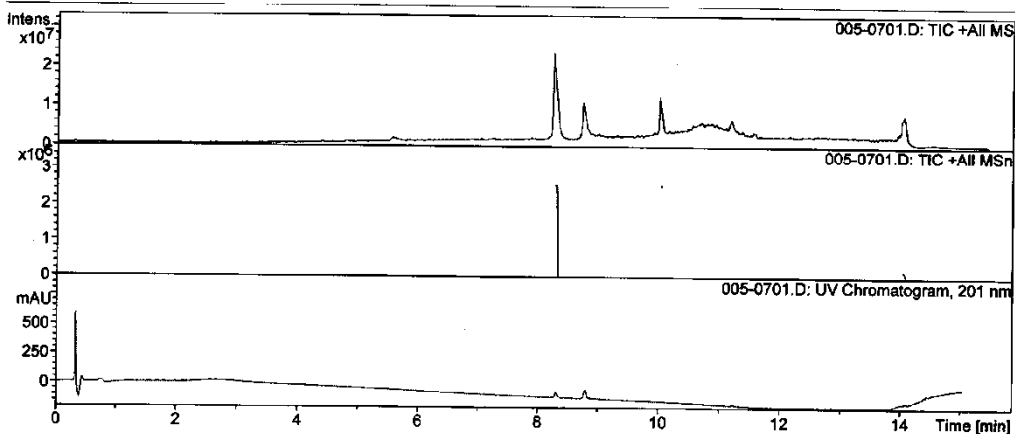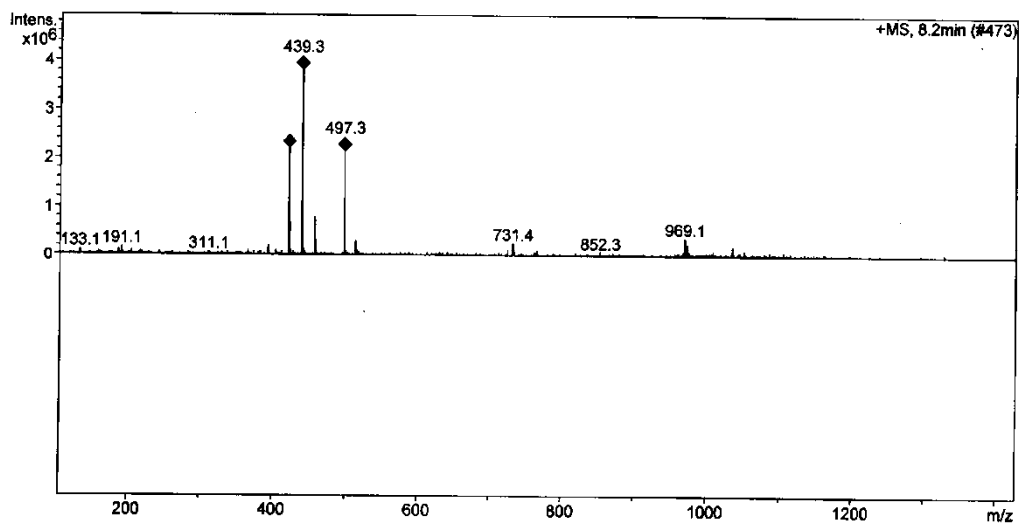

Figure S51. ESI(-)MS spectrum of horipenoid F (6)

### Display Report

#### Analysis Info

Analysis Name 005-2601.D  
Method Copy of DSOPMS2N.M  
Sample Name yjm-EHC2-7223  
Comment

Acquisition Date 01/12/12 20:33:34  
Operator Administrator  
Instrument esquire3000plus

#### Acquisition Parameter

|                   |             |              |            |                          |          |
|-------------------|-------------|--------------|------------|--------------------------|----------|
| Ion Source Type   | ESI         | Ion Polarity | Negative   | Alternating Ion Polarity | off      |
| Mass Range Mode   | Std/Normal  | Scan Begin   | 100 m/z    | Scan End                 | 1750 m/z |
| Capillary Exit    | -158.5 Volt | Skim 1       | -40.0 Volt | Trap Drive               | 92.9     |
| Accumulation Time | 15000 纒     | Averages     | 3 Spectra  | Auto MS/MS               | on       |

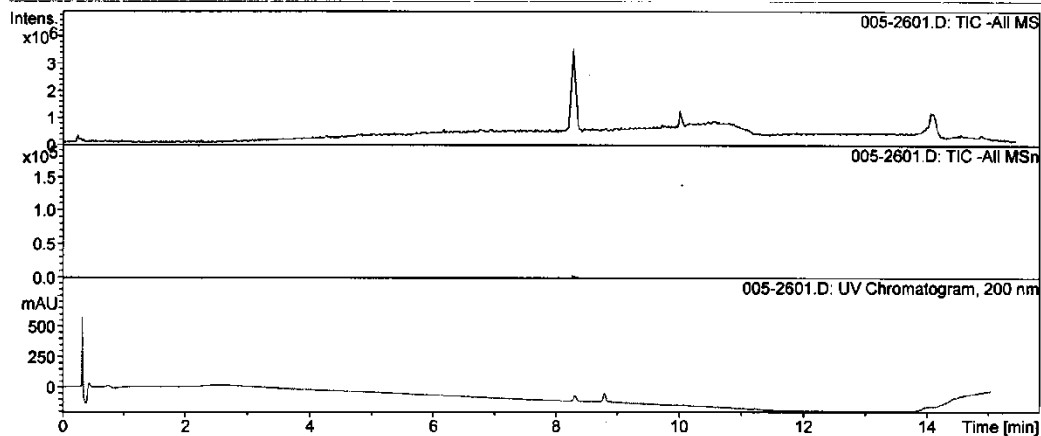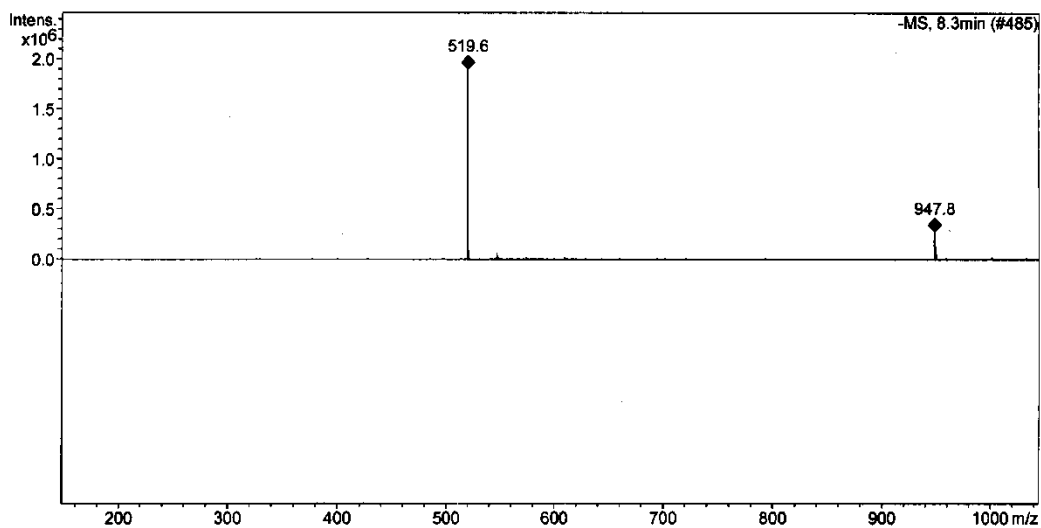



Figure S52. HRESI(-)MS spectrum of horipenoid F (6)

Elemental Composition Report

Single Mass Analysis

Tolerance = 5.0 PPM / DBE: min = -1.5, max = 50.0

Element prediction: Off

Number of isotope peaks used for i-FIT = 3

Monoisotopic Mass, Even Electron Ions

121 formula(e) evaluated with 1 results within limits (up to 50 best isotopic matches for each mass)

Elements Used:

C: 10-50 H: 1-80 O: 0-30

EHC2-7223

LCT PXE KE324

09-Mar-2012

14:24:20

EHC2-7223\_20120309 6 (0.124) AM2 (Ar,10000.0,0.00,1.00); ABS: Cm (5:19)

1: TOF MS ES-

1.34e+004

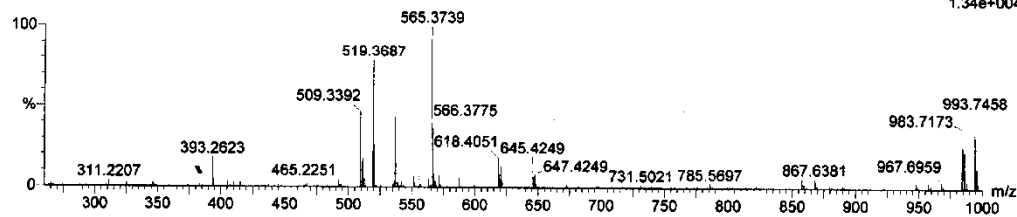

Minimum: -1.5  
Maximum: 50.0

| Mass     | Calc. Mass | mDa | PPM | DBE | i-FIT | i-FIT (Norm) | Formula    |
|----------|------------|-----|-----|-----|-------|--------------|------------|
| 519.3687 | 519.3686   | 0.1 | 0.2 | 6.5 | 95.7  | 0.0          | C31 H51 O6 |

Figure S53. IR spectrum of horipenoid F (6)

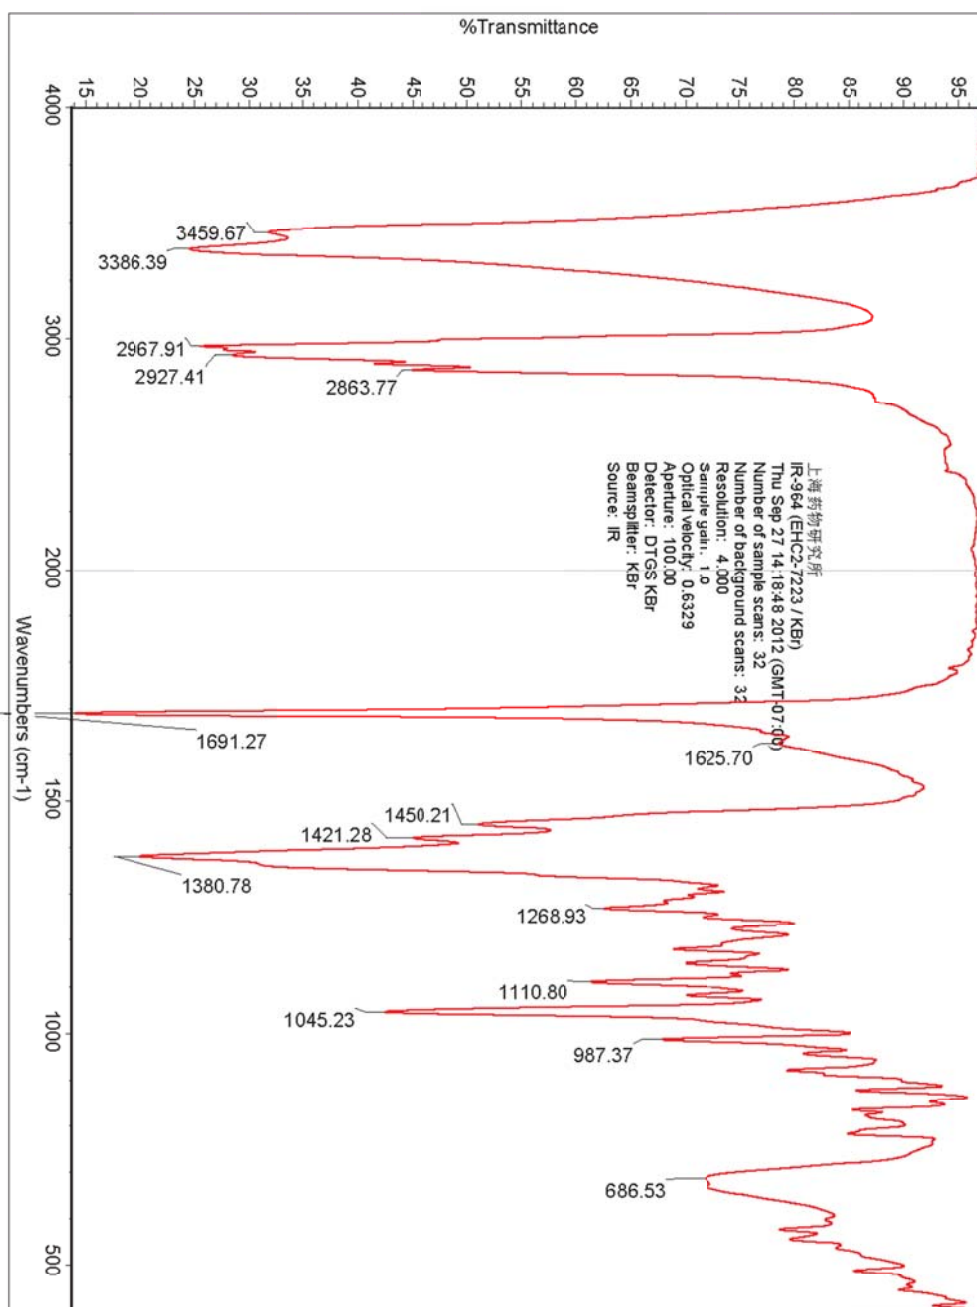

**Figure S54.**  $^1\text{H}$  NMR spectrum of horipenoid G (**7**) in  $\text{C}_5\text{D}_5\text{N}$

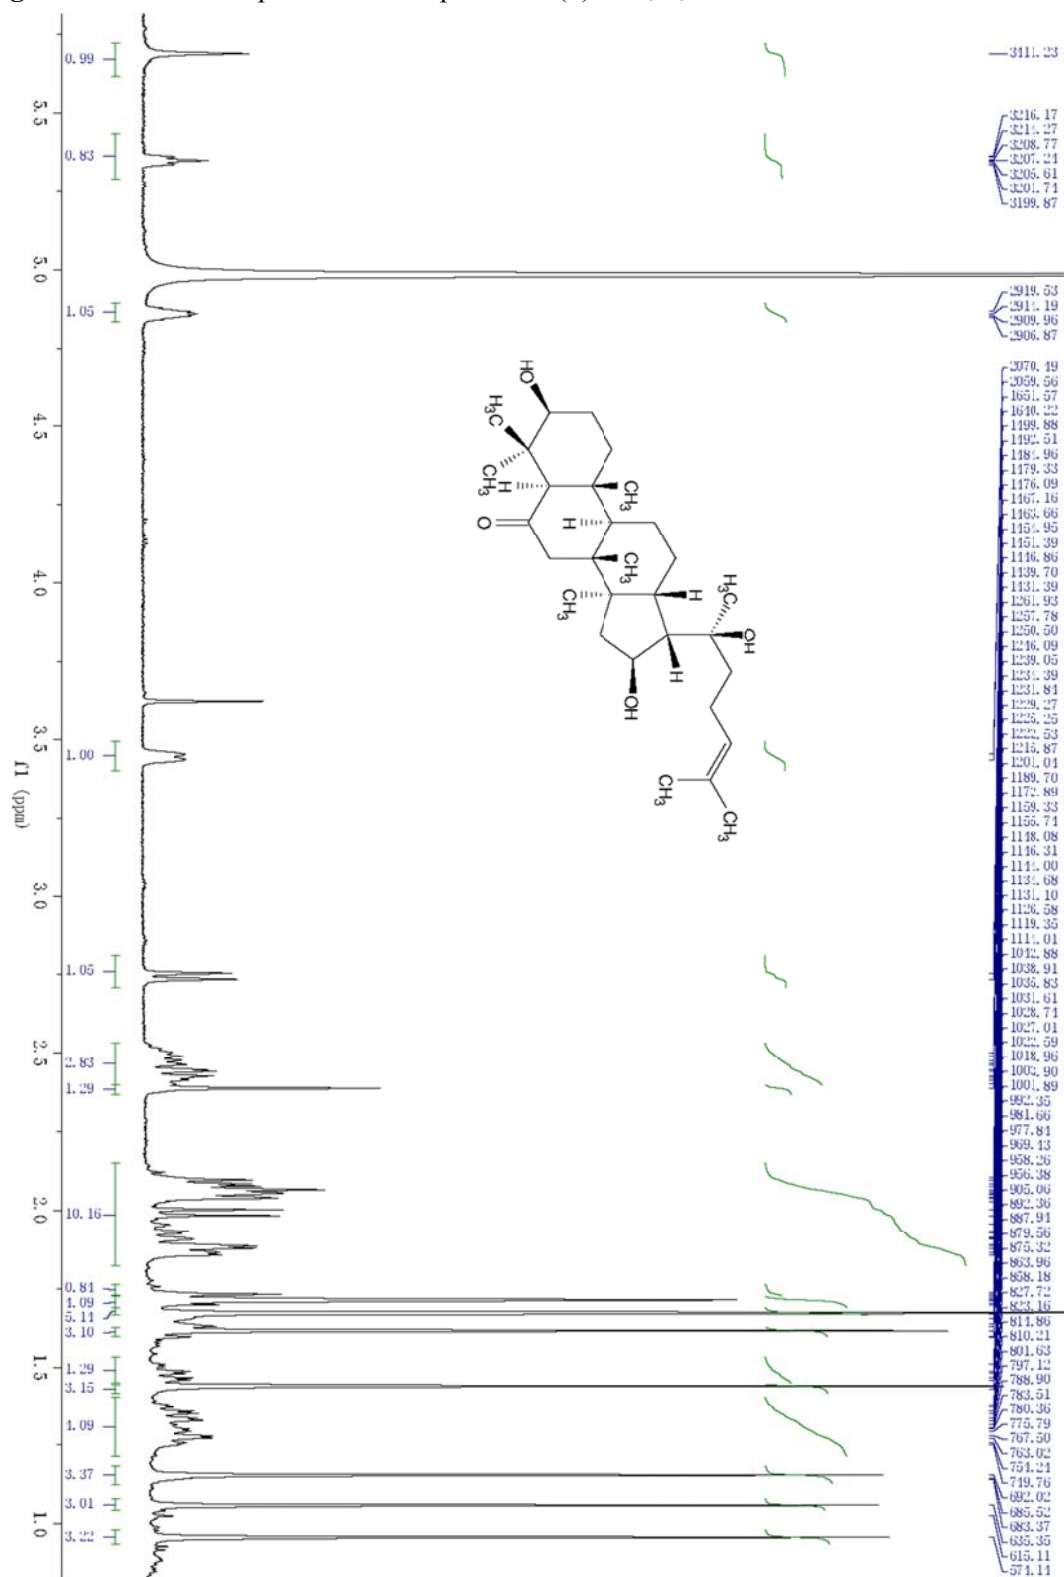

**Figure S55.**  $^{13}\text{C}$  NMR spectrum of horipenoid G (**7**) in  $\text{C}_5\text{D}_5\text{N}$

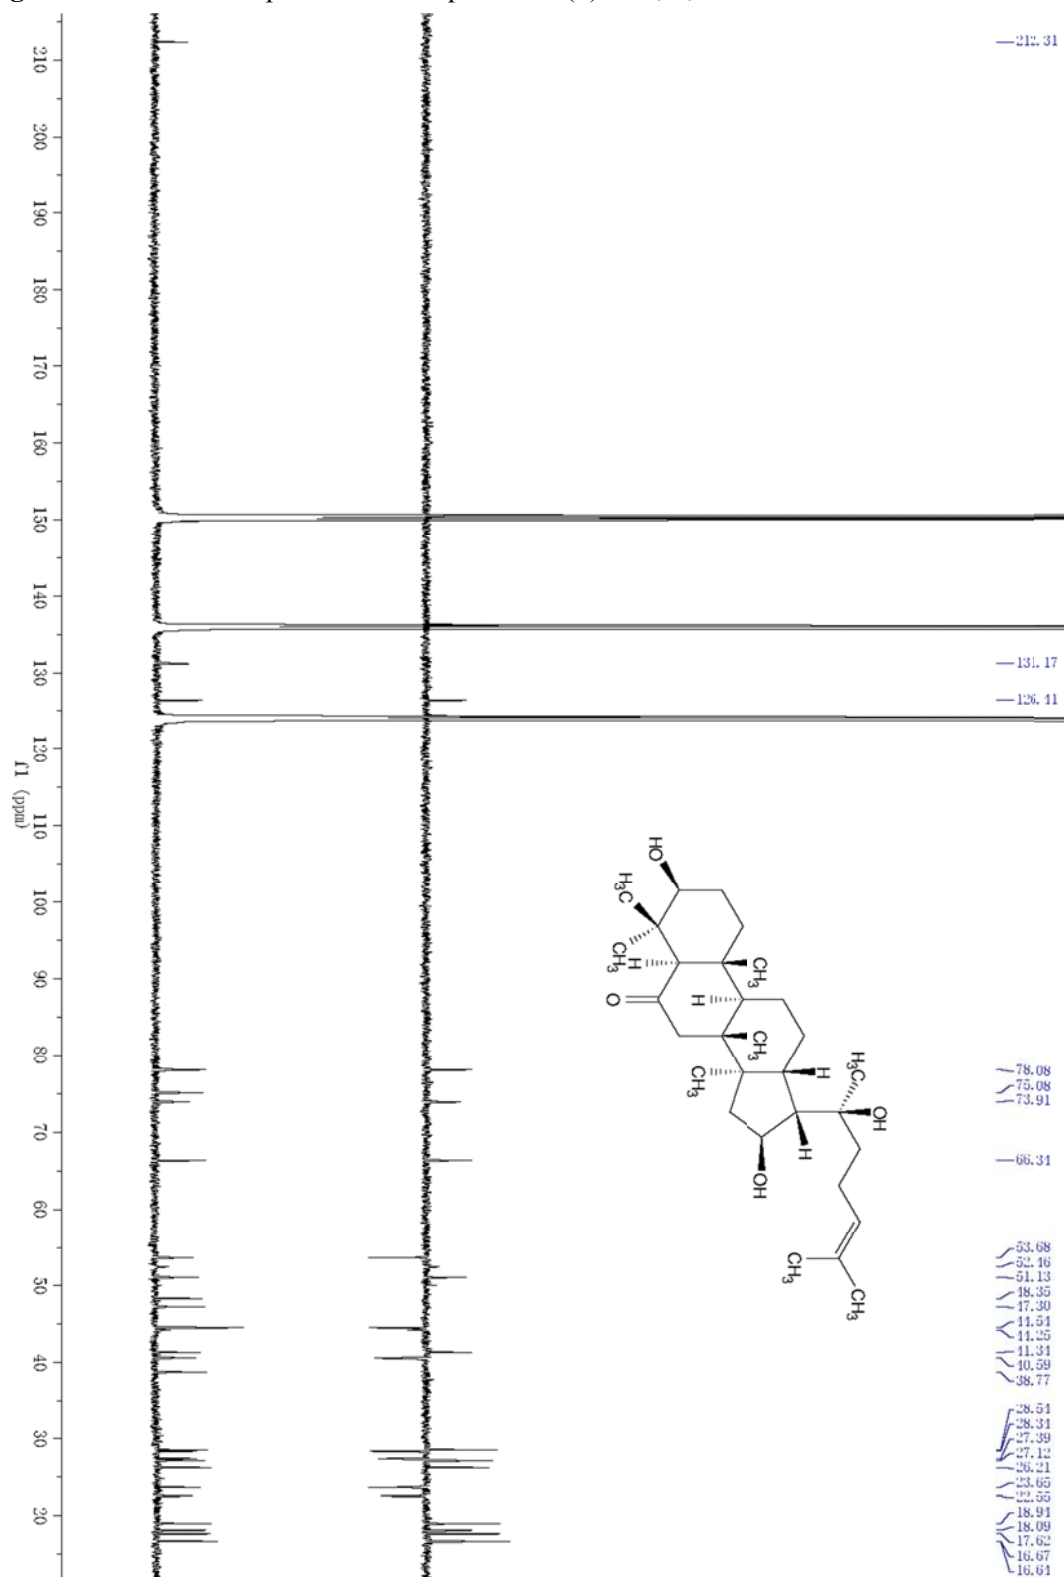

**Figure S56.** HSQC spectrum of horipenoid G (**7**) in C<sub>5</sub>D<sub>5</sub>N

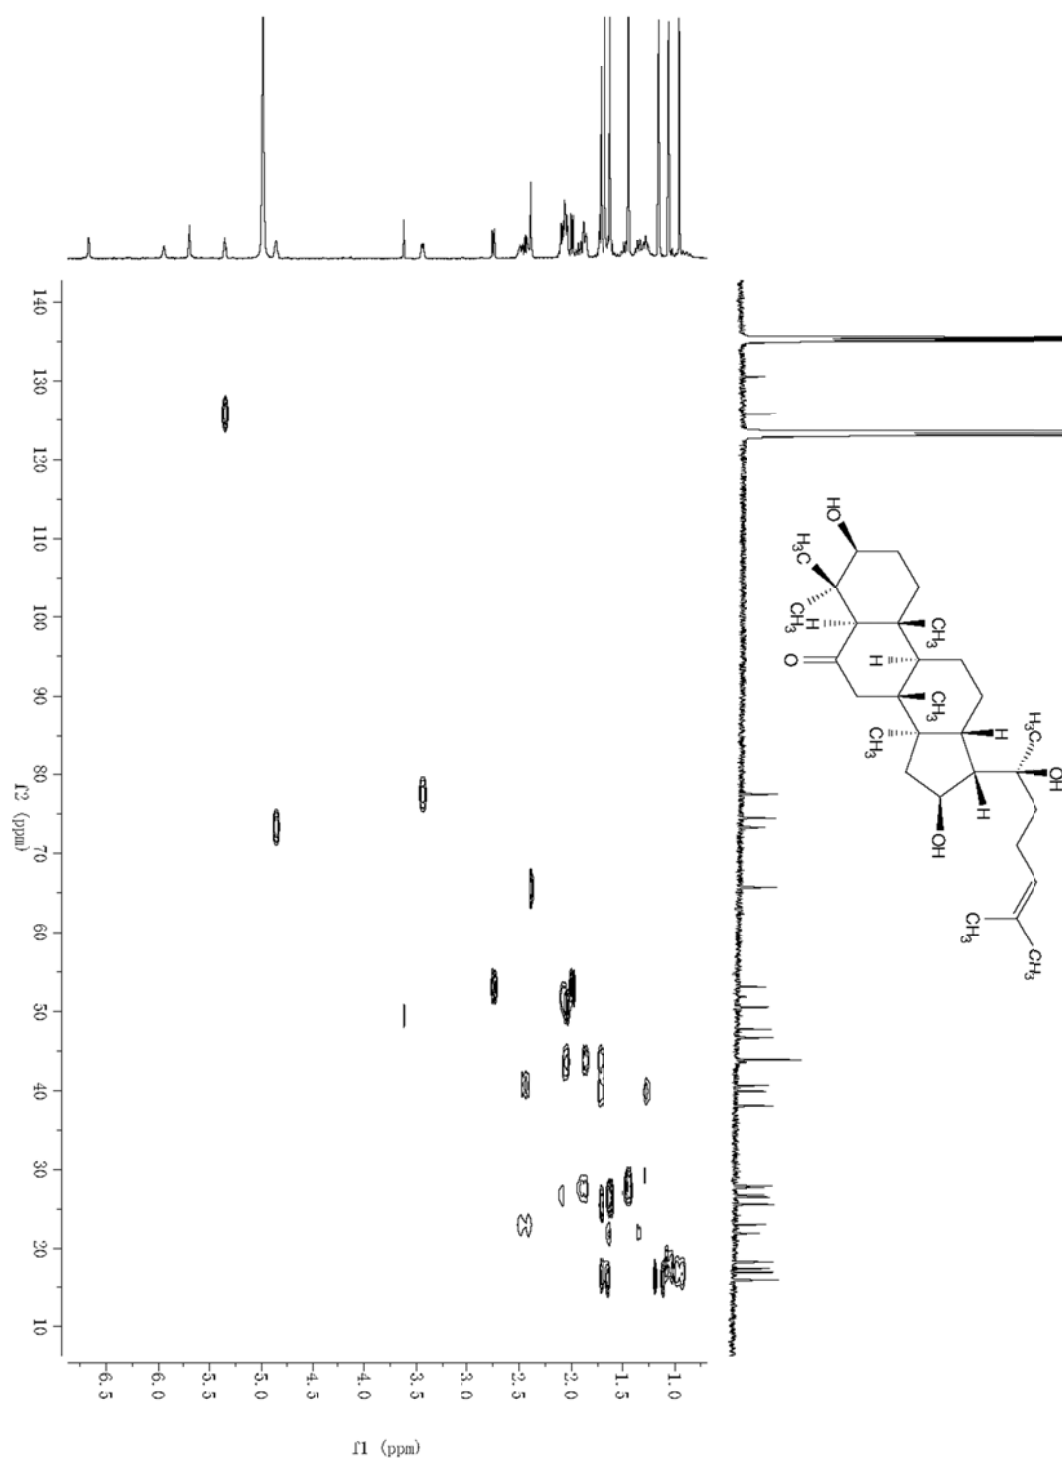

**Figure S57.** HMBC spectrum of horipenoid G (7) in  $C_5D_5N$

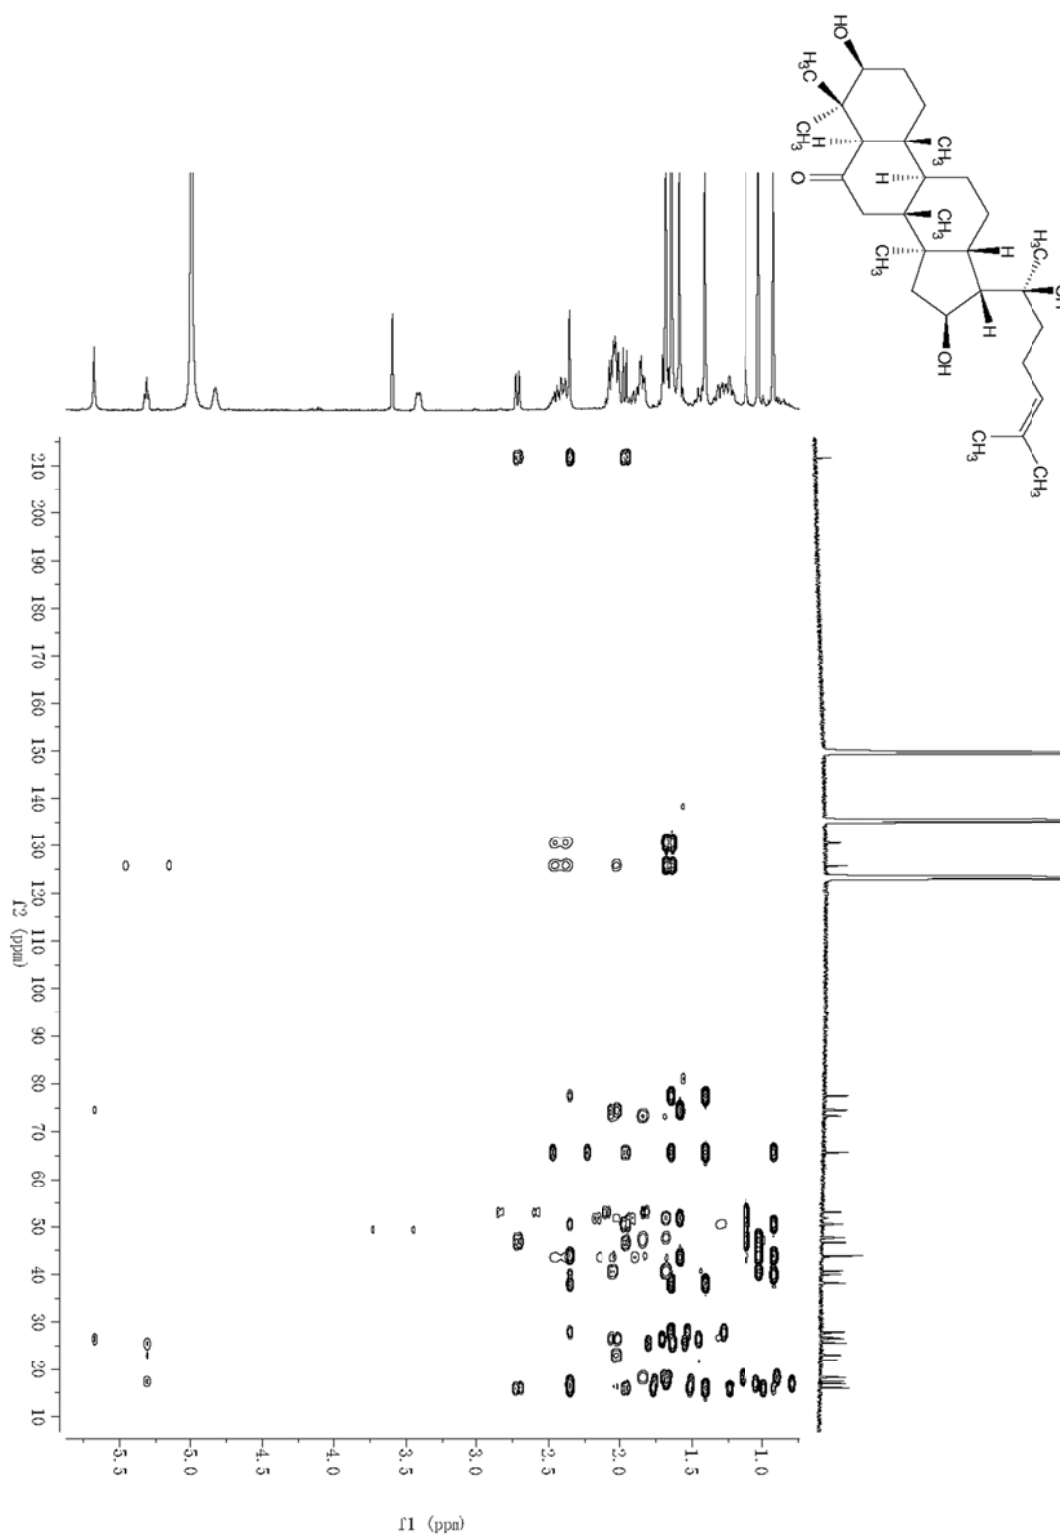

Figure S58. ROESY spectrum of horipenoid G (7) in C<sub>5</sub>D<sub>5</sub>N

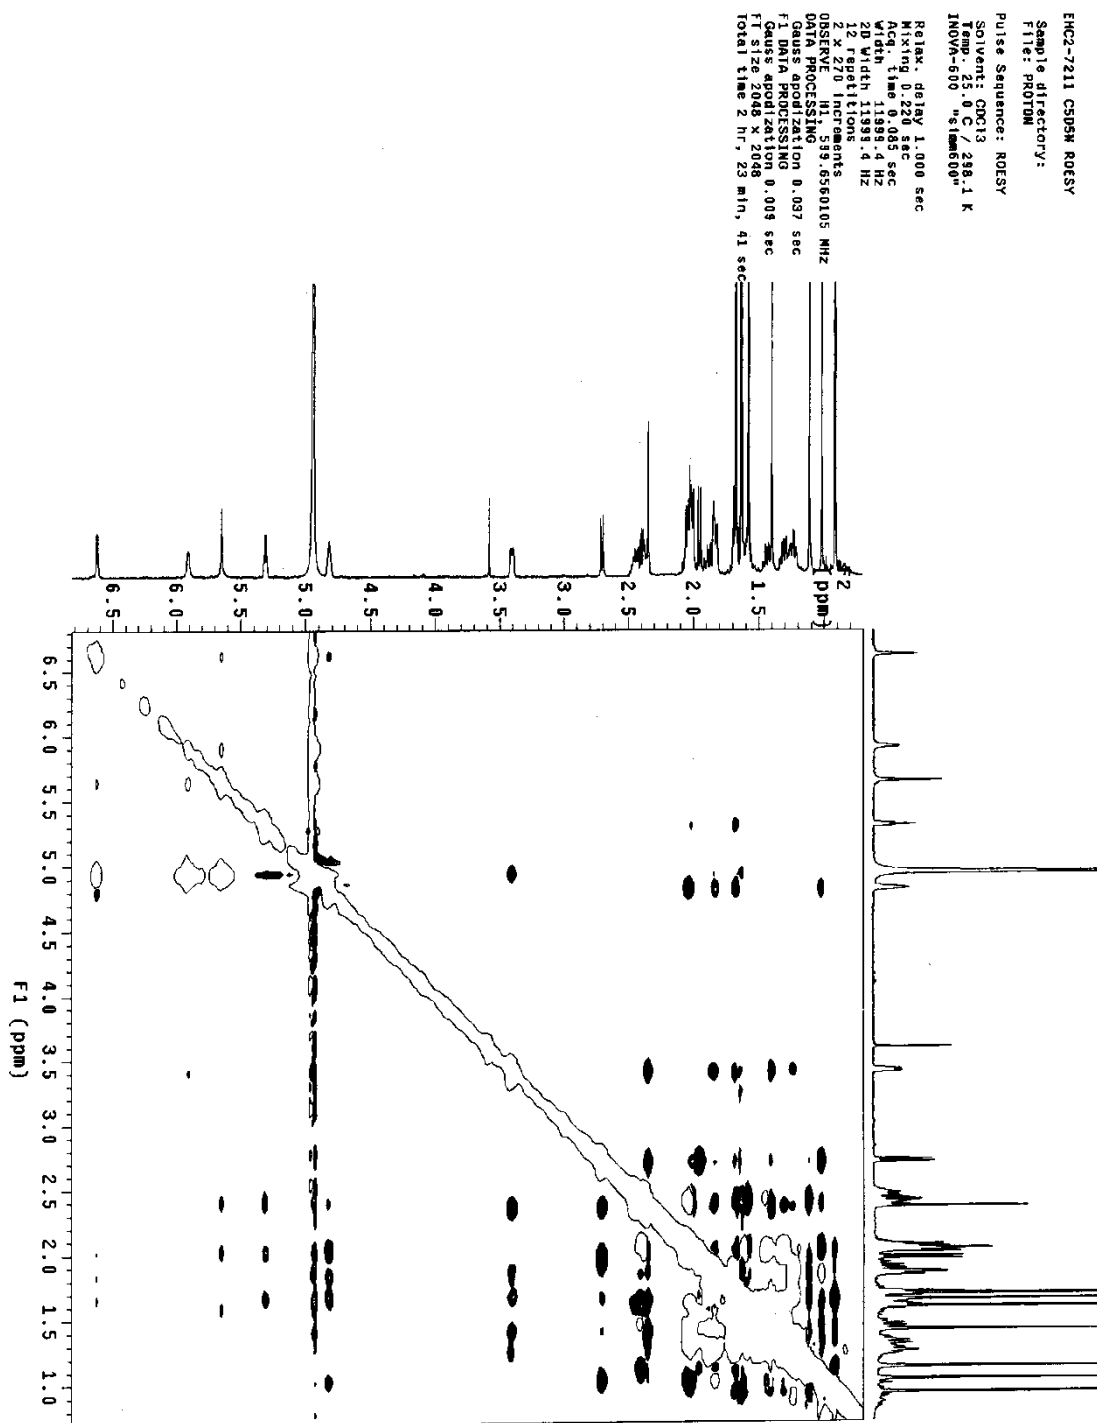

Figure S59. ESI(+)MS spectrum of horipenoid G (7)

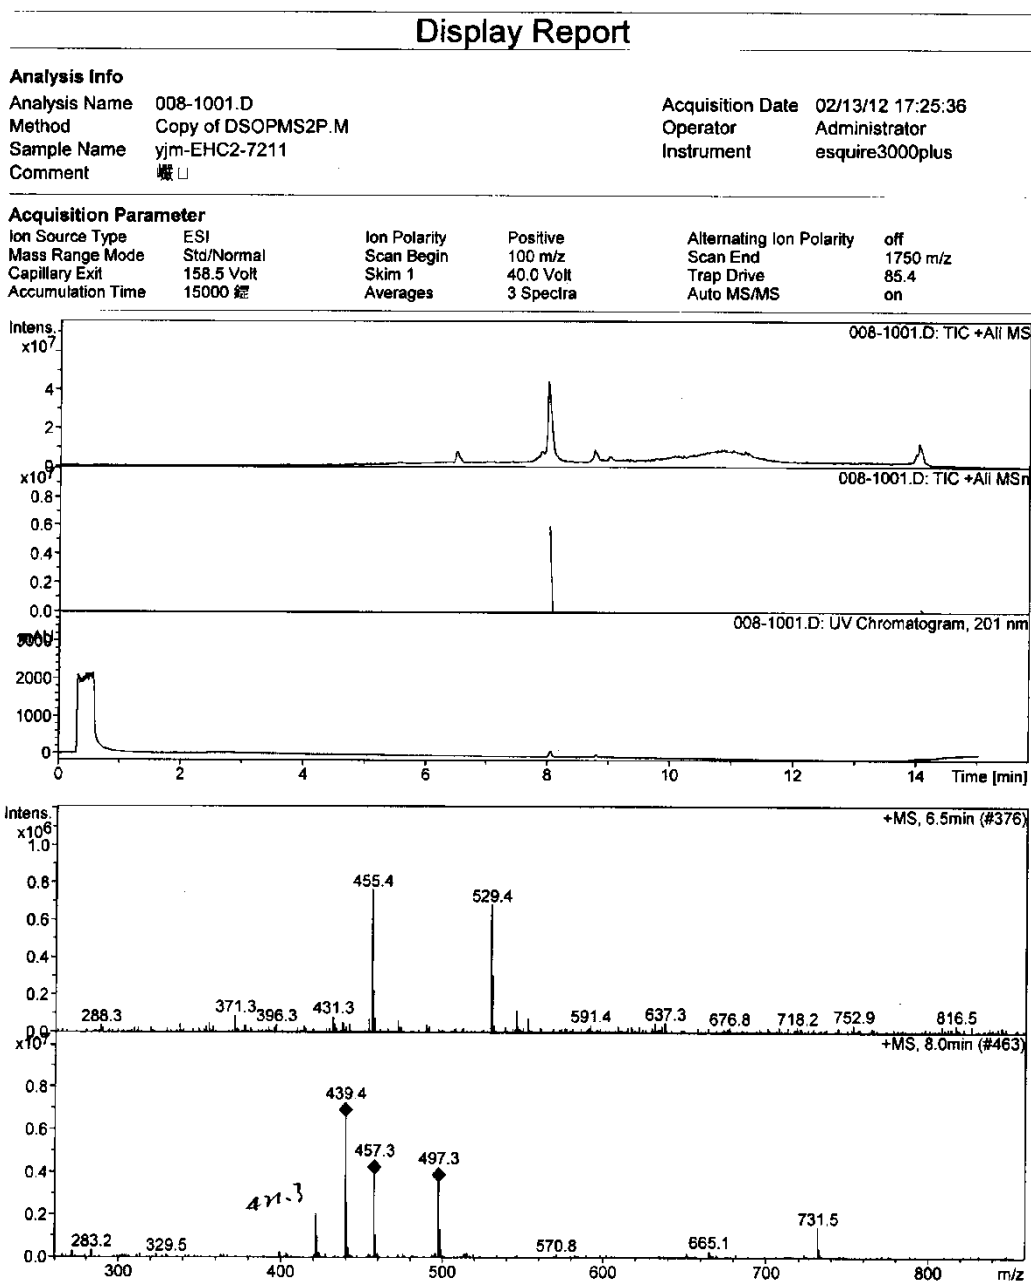



Figure S60. ESI(-)MS spectrum of horipenoid G (7)

### Display Report

#### Analysis Info

Analysis Name 008-2101.D  
Method Copy of DSOPMS2N.M  
Sample Name yjm-EHC2-7211  
Comment 囀口

Acquisition Date 02/13/12 20:24:49  
Operator Administrator  
Instrument esquire3000plus

#### Acquisition Parameter

|                   |             |              |            |                          |          |
|-------------------|-------------|--------------|------------|--------------------------|----------|
| Ion Source Type   | ESI         | Ion Polarity | Negative   | Alternating Ion Polarity | off      |
| Mass Range Mode   | Std/Normal  | Scan Begin   | 100 m/z    | Scan End                 | 1750 m/z |
| Capillary Exit    | -158.5 Volt | Skim 1       | -40.0 Volt | Trap Drive               | 92.9     |
| Accumulation Time | 15000 經     | Averages     | 3 Spectra  | Auto MS/MS               | on       |

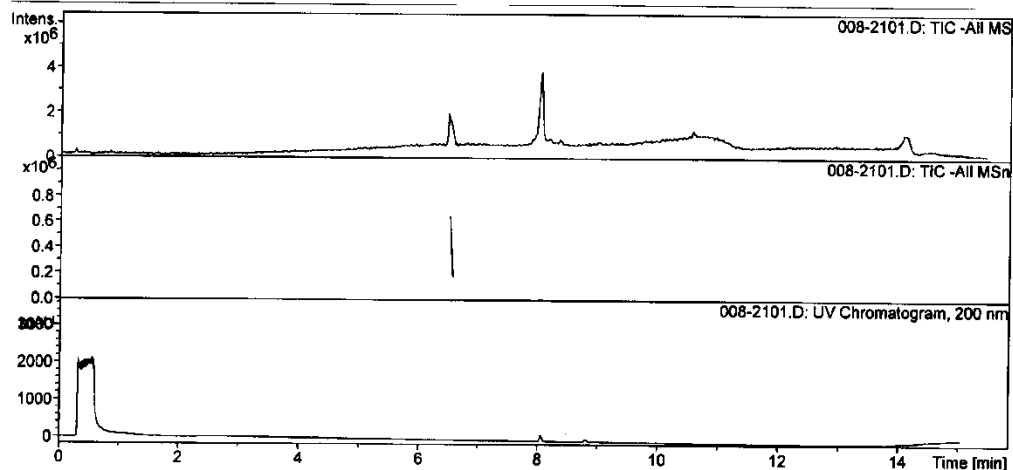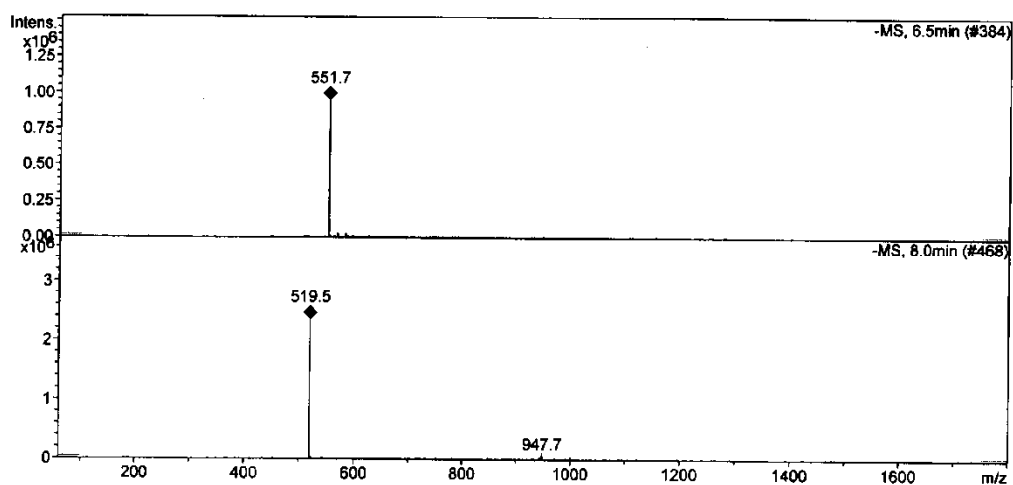

Figure S61. HRESI(-)MS spectrum of horipenoid G (7)

Elemental Composition Report

Single Mass Analysis

Tolerance = 5.0 PPM / DBE: min = -1.5, max = 50.0  
 Element prediction: Off  
 Number of isotope peaks used for i-FIT = 3

Monoisotopic Mass, Even Electron Ions

121 formula(e) evaluated with 1 results within limits (up to 50 best isotopic matches for each mass)

Elements Used:

C: 10-80 H: 1-110 O: 0-30

EHC2-7211

LCT PXE KE324

09-Mar-2012  
 14:49:14  
 1: TOF MS ES-  
 4.73e+004

EHC2-7211\_20120309 16 (0.318) AM2 (Ar,10000.0,0.00,1.00); ABS; Cm (8:33)

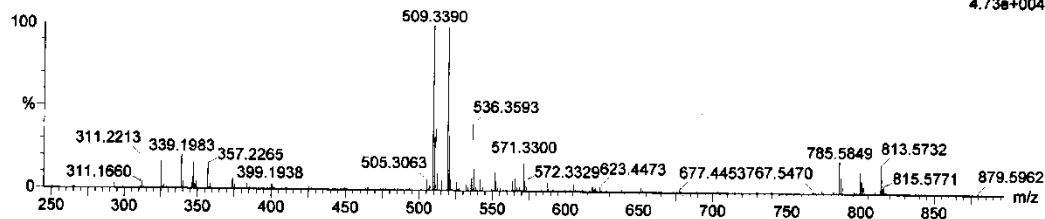

Minimum:

Maximum: 5.0 5.0 -1.5

519.3689 519.3686 0.3 0.6 6.5

| Mass     | Calc. Mass | mDa | PPM | DBE | i-FIT | i-FIT (Norm) | Formula    |
|----------|------------|-----|-----|-----|-------|--------------|------------|
| 519.3689 | 519.3686   | 0.3 | 0.6 | 6.5 | 172.7 | 0.0          | C31 H51 O6 |

Figure S62. IR spectrum of horipenoid G (7)

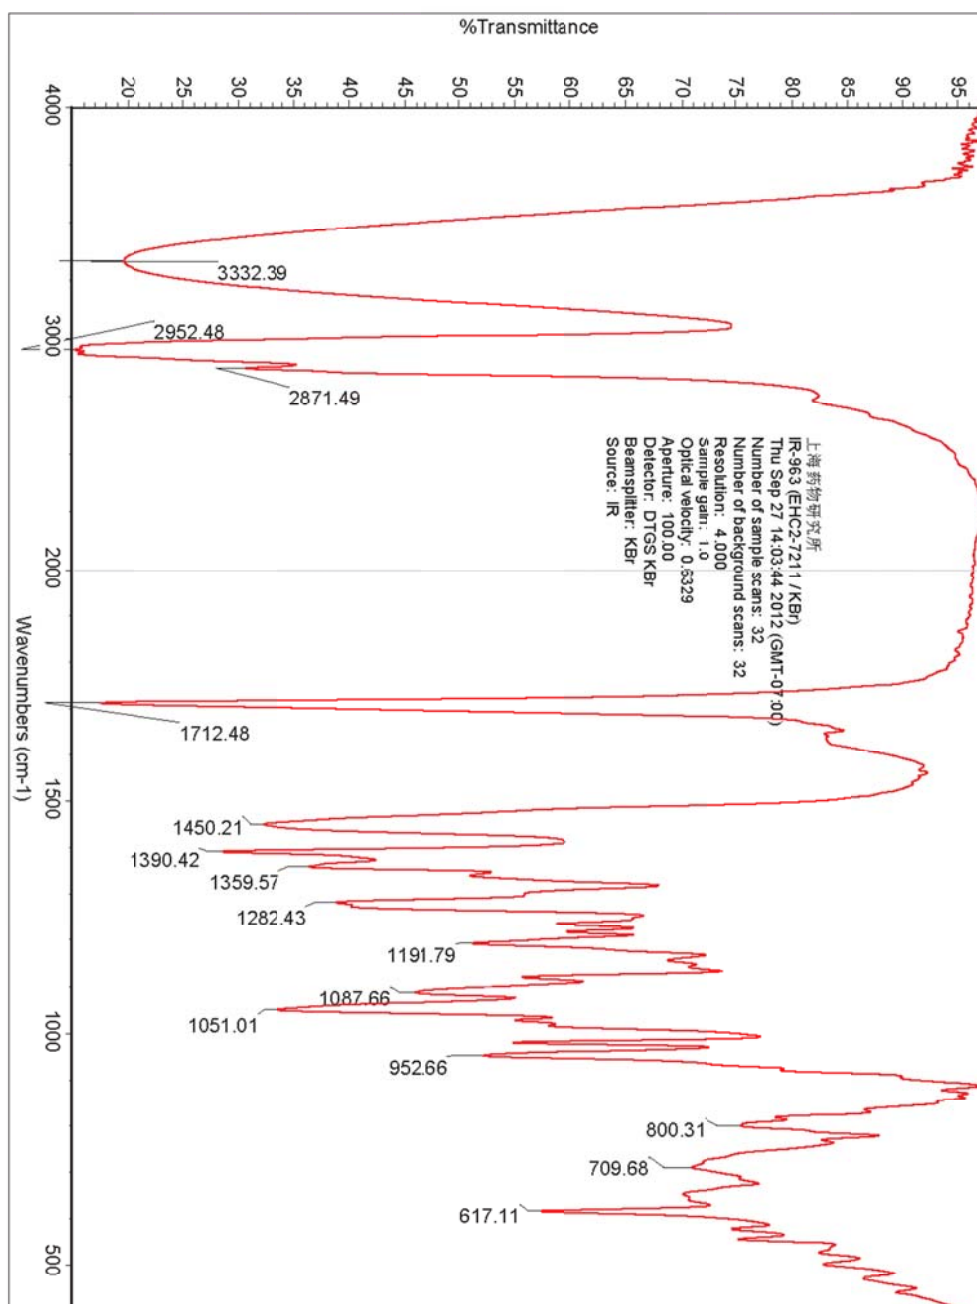

**Figure S63.**  $^1\text{H}$  NMR spectrum of horipenoid H (**8**) in  $\text{C}_5\text{D}_5\text{N}$

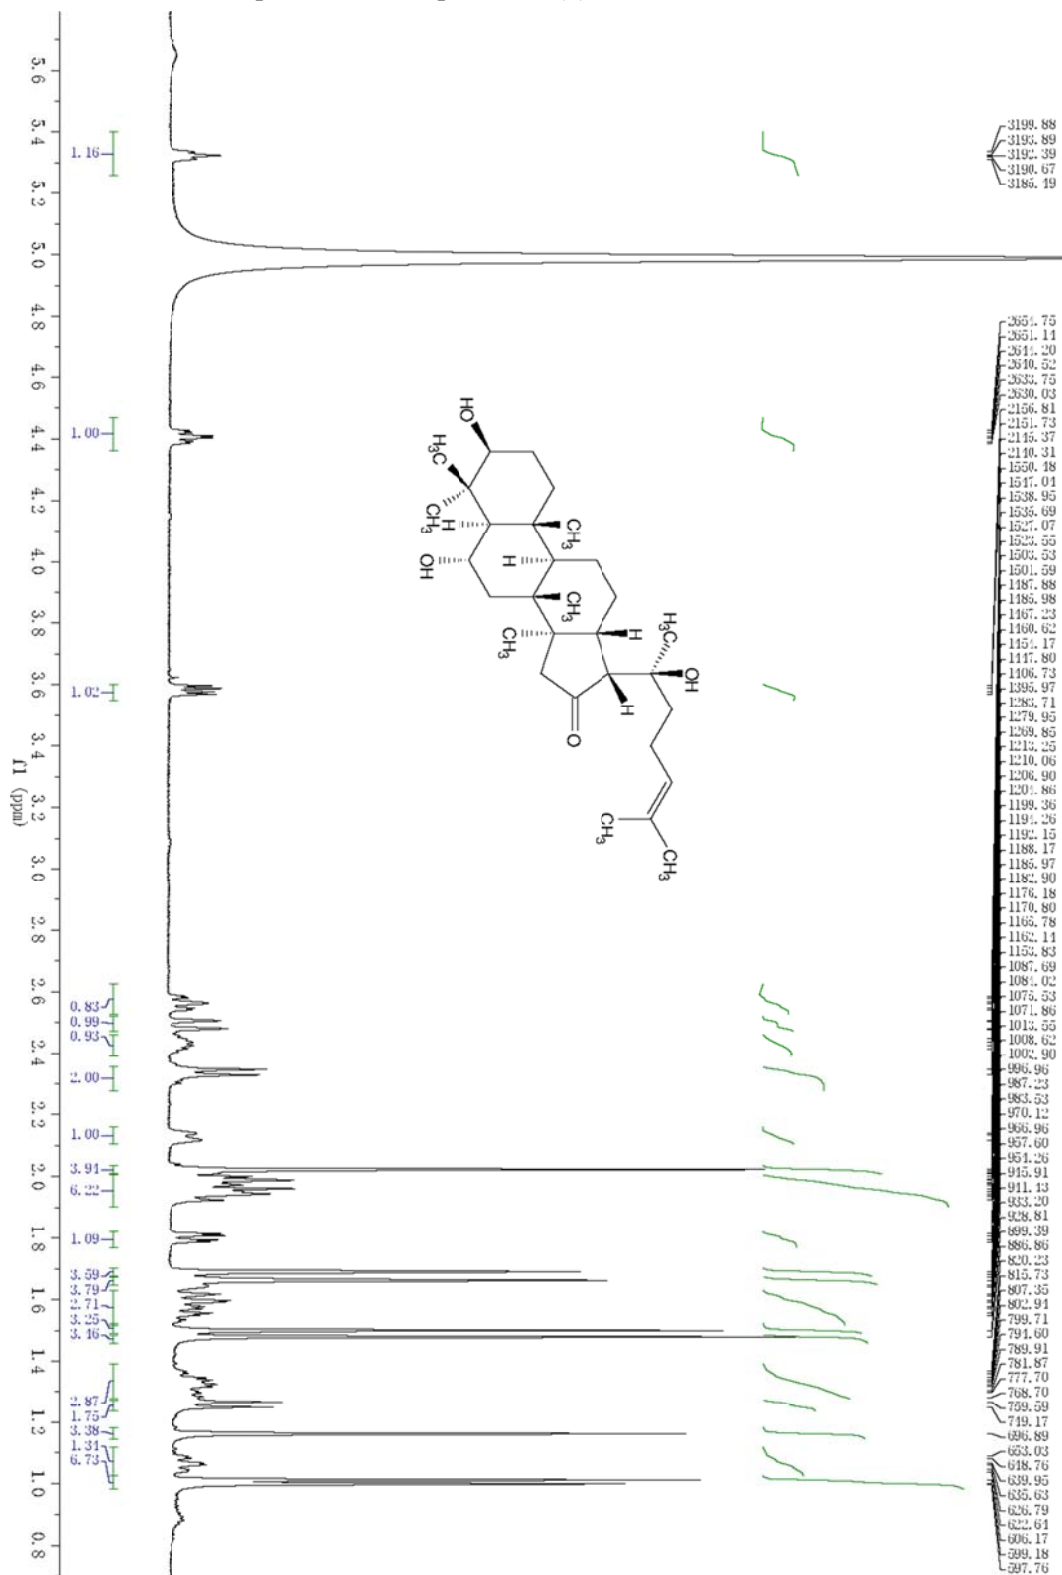

**Figure S64.**  $^{13}\text{C}$  NMR spectrum of horipenoid H (**8**) in  $\text{C}_5\text{D}_5\text{N}$

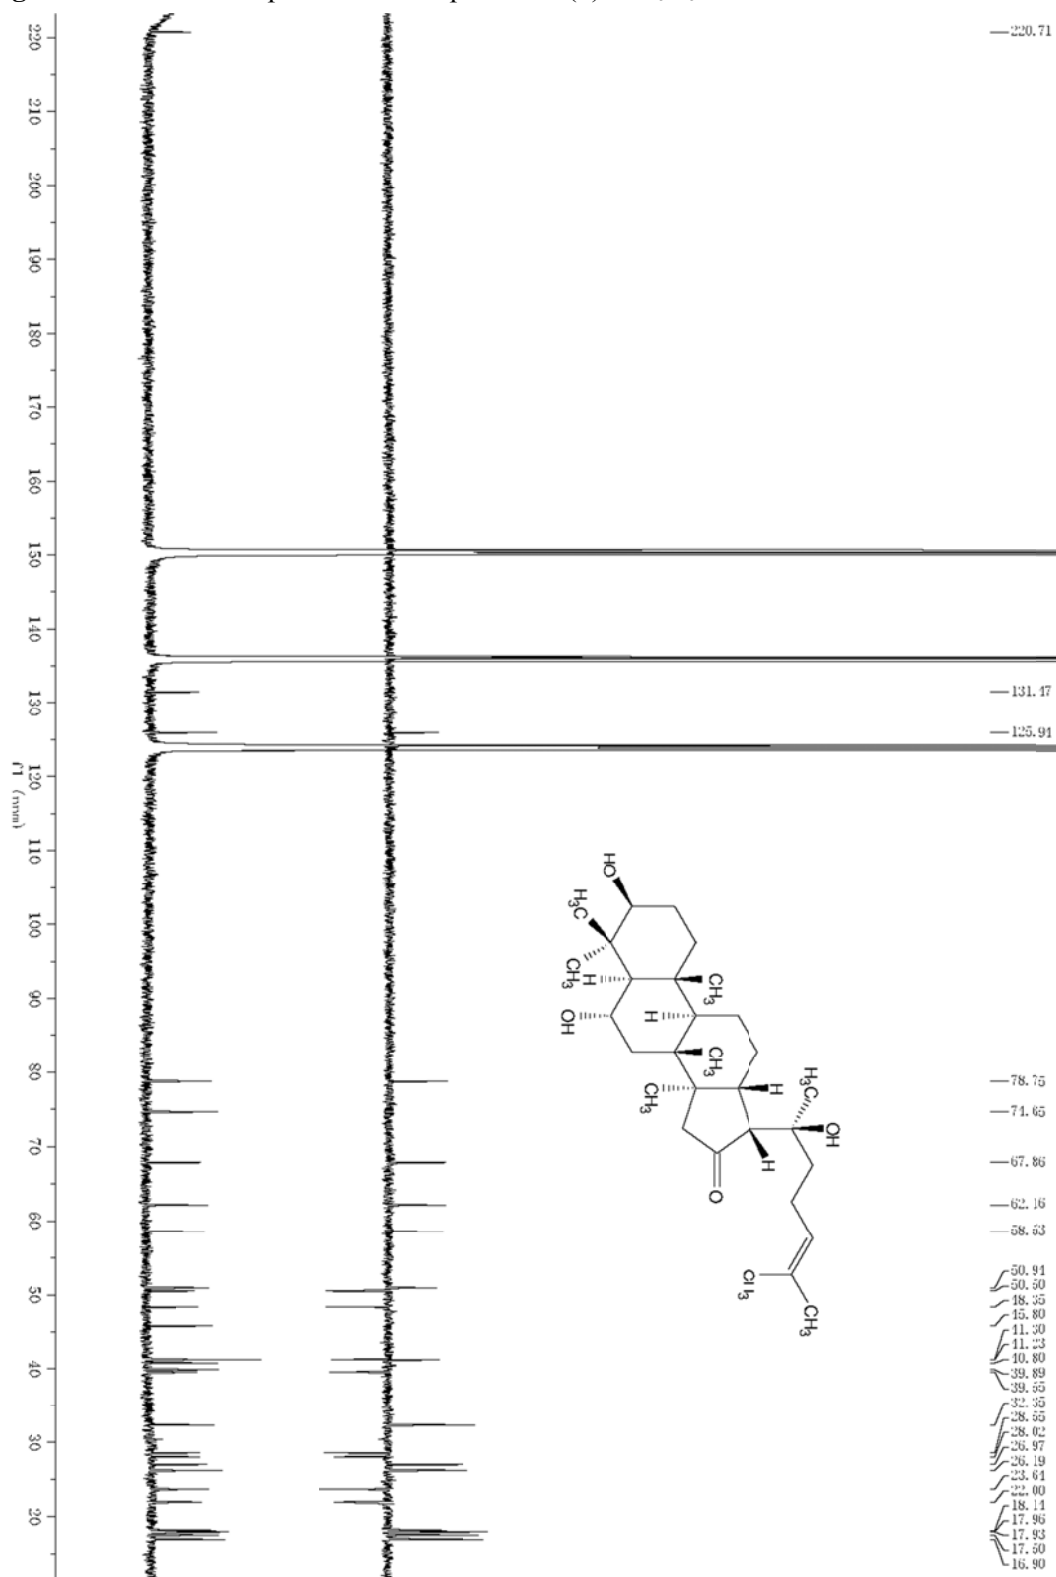

**Figure S65.** HSQC spectrum of horipenoid H (**8**) in C<sub>5</sub>D<sub>5</sub>N

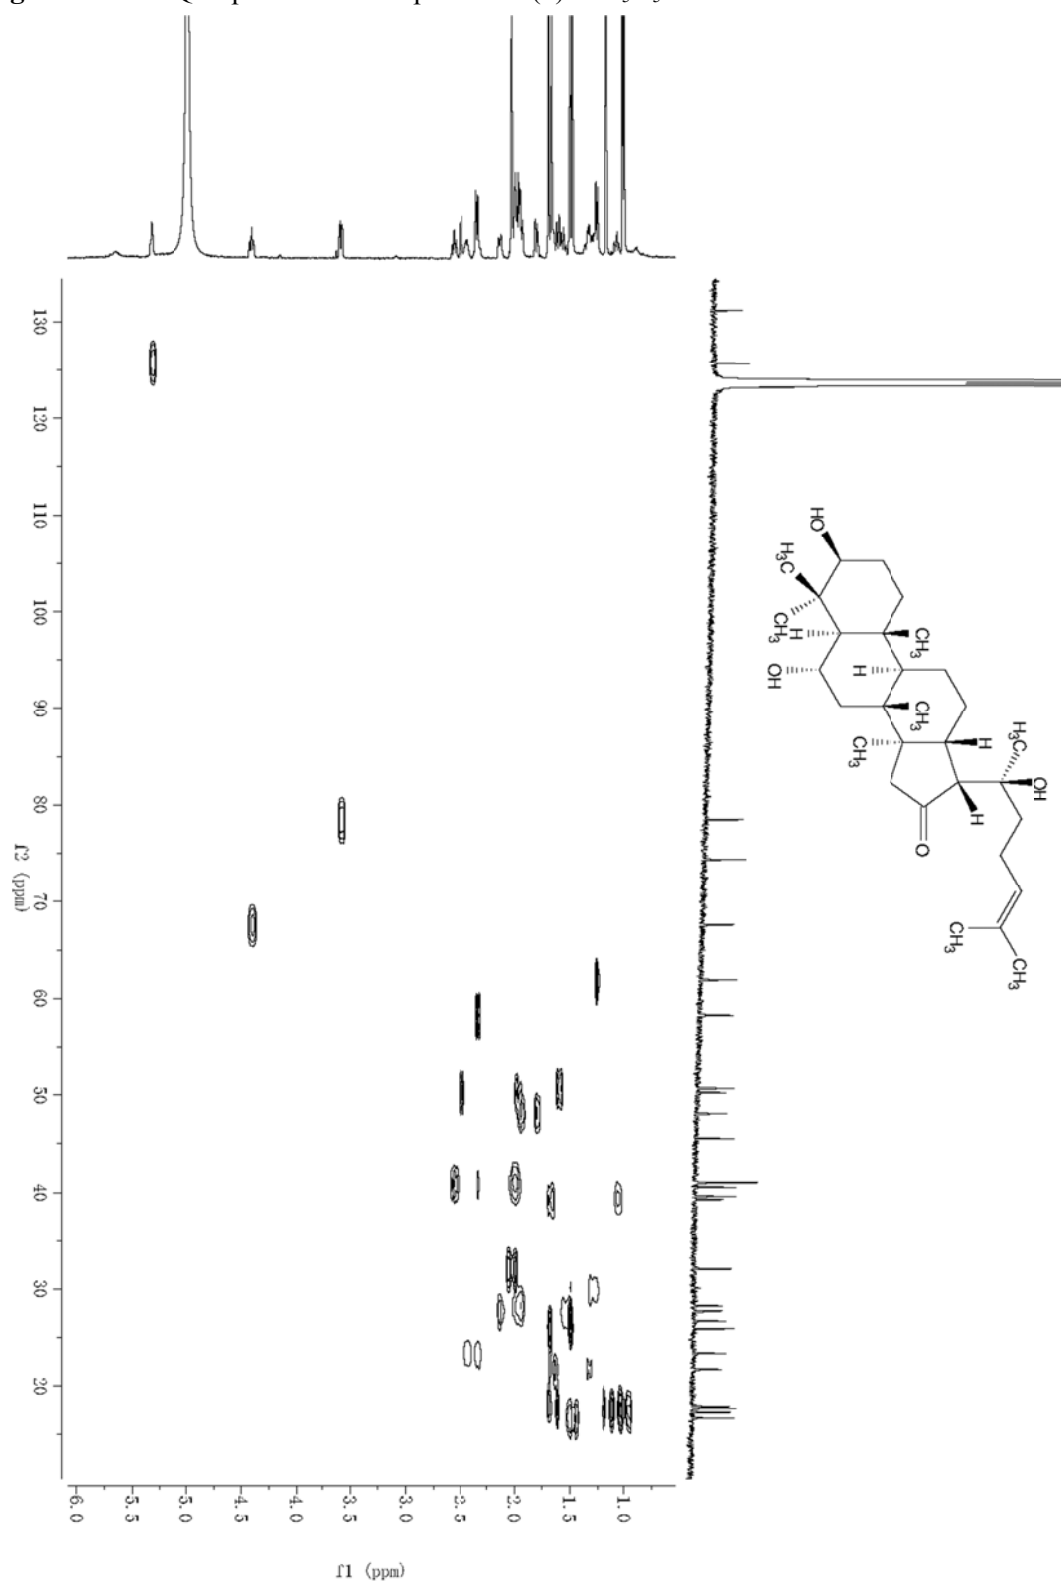

**Figure S66.** HMBC spectrum of horipenoid H (**8**) in  $C_5D_5N$

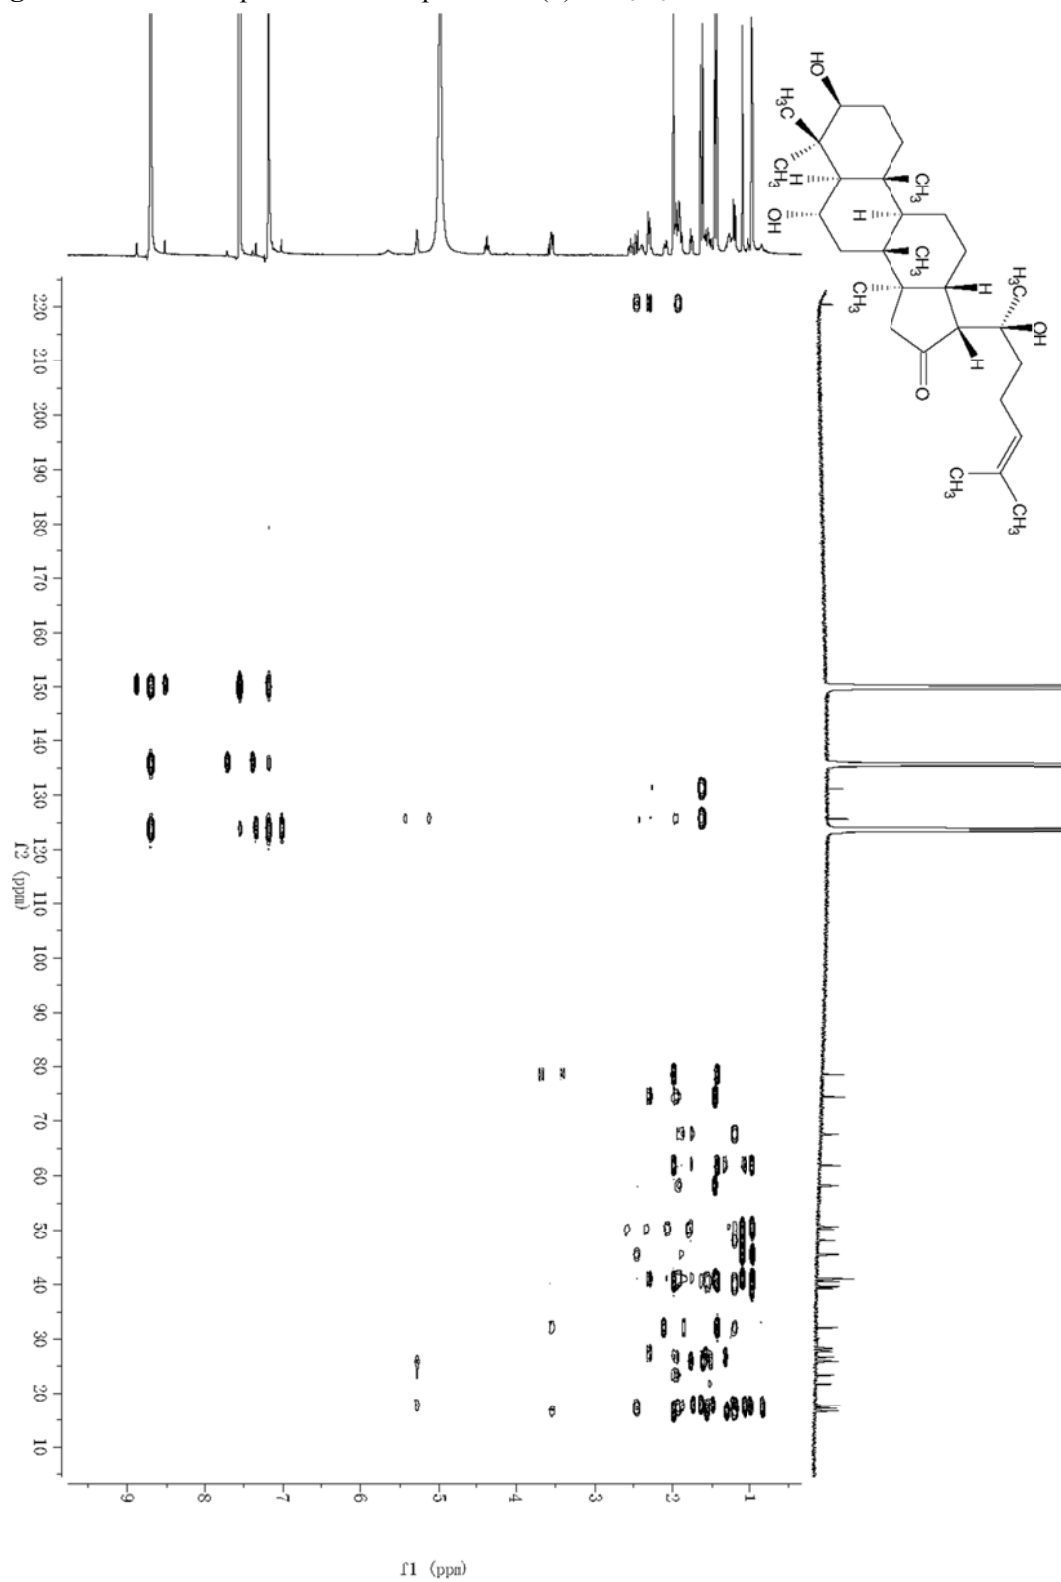

Figure S67 ROESY spectrum of horipenoid H (8) in C<sub>5</sub>D<sub>5</sub>N

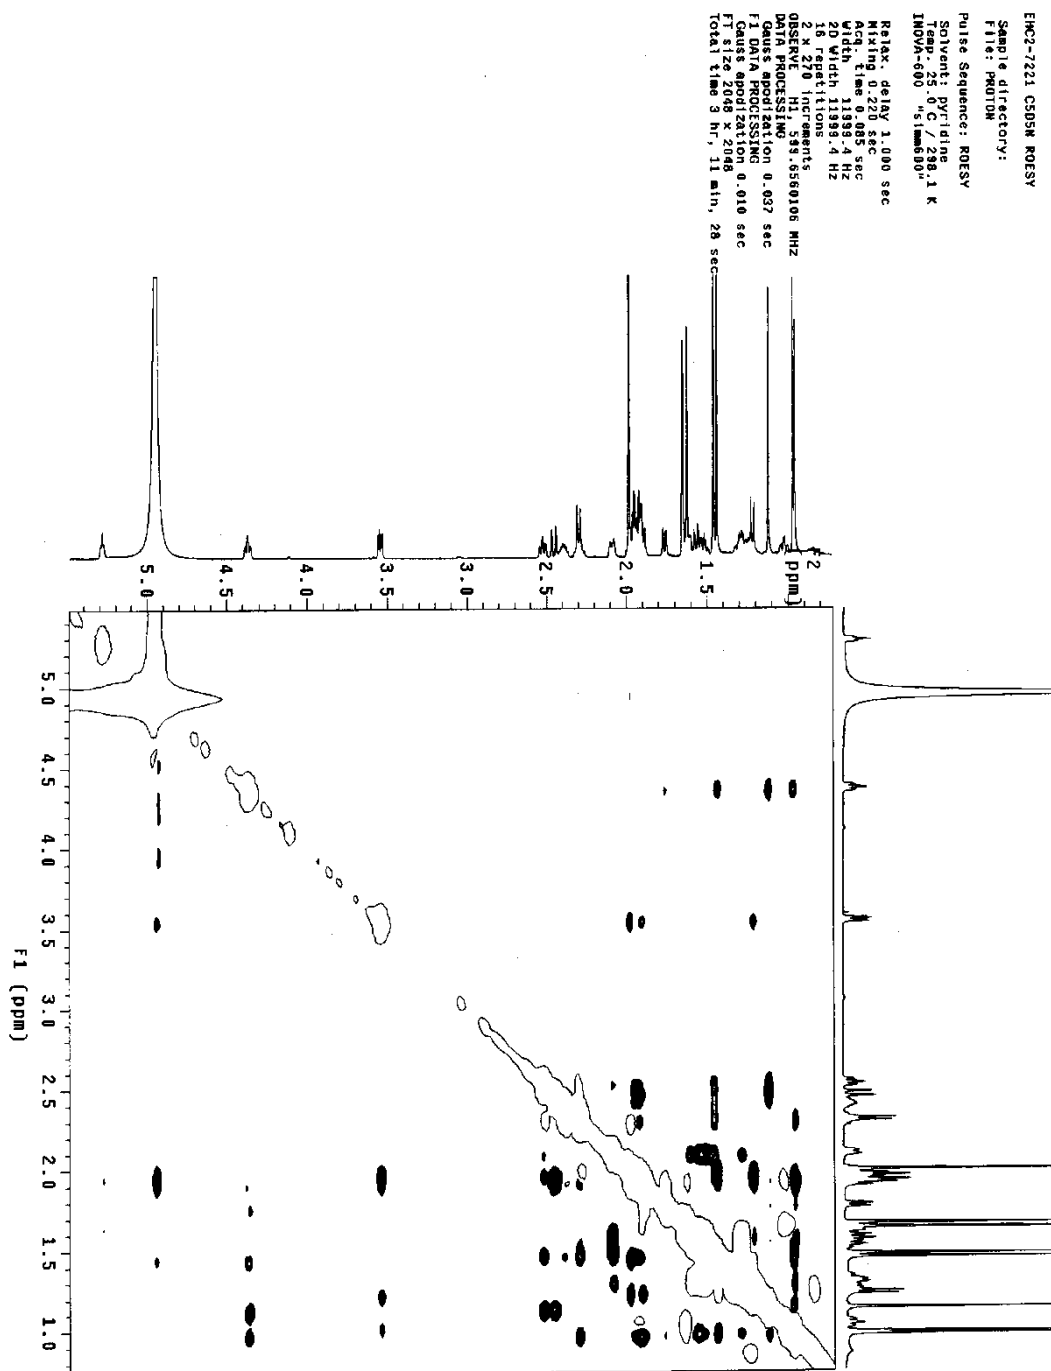



Figure S68. ESI(+)MS spectrum of horipenoid H (8)

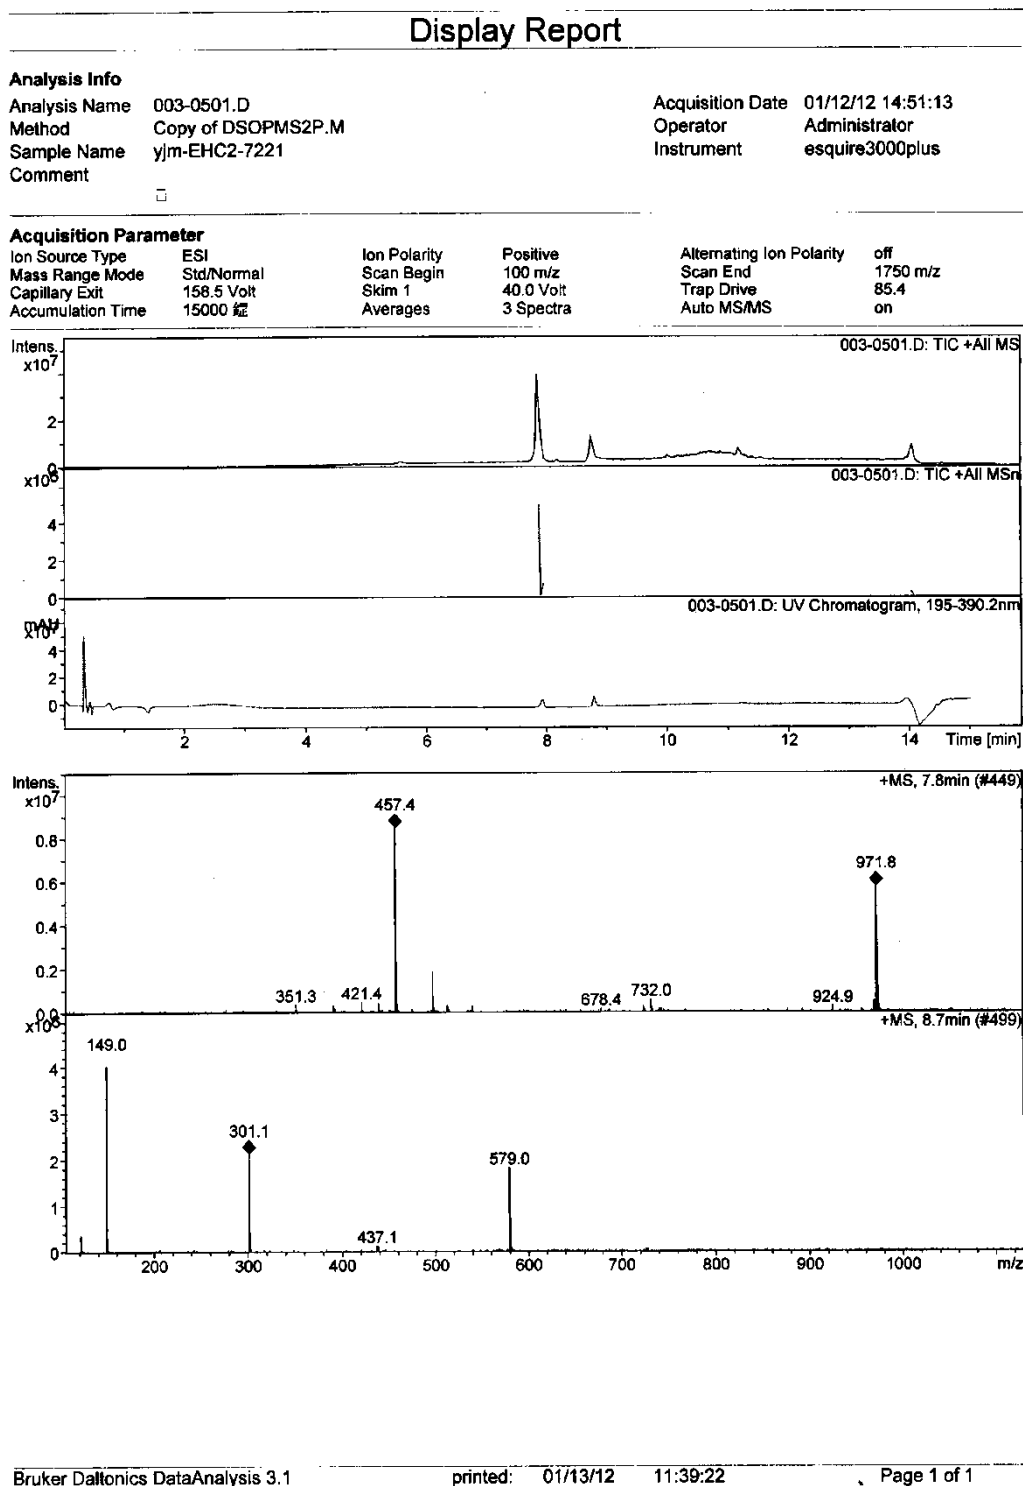

Figure S69. ESI(-)MS spectrum of horipenoid H (8)

### Display Report

#### Analysis Info

Analysis Name 003-2401.D  
Method Copy of DSOPMS2N.M  
Sample Name yjm-EHC2-7221  
Comment

Acquisition Date 01/12/12 20:00:58  
Operator Administrator  
Instrument esquire3000plus

#### Acquisition Parameter

|                   |             |              |            |                          |          |
|-------------------|-------------|--------------|------------|--------------------------|----------|
| Ion Source Type   | ESI         | Ion Polarity | Negative   | Alternating Ion Polarity | off      |
| Mass Range Mode   | Std/Normal  | Scan Begin   | 100 m/z    | Scan End                 | 1750 m/z |
| Capillary Exit    | -158.5 Volt | Skim 1       | -40.0 Volt | Trap Drive               | 92.9     |
| Accumulation Time | 15000 纒     | Averages     | 3 Spectra  | Auto MS/MS               | on       |

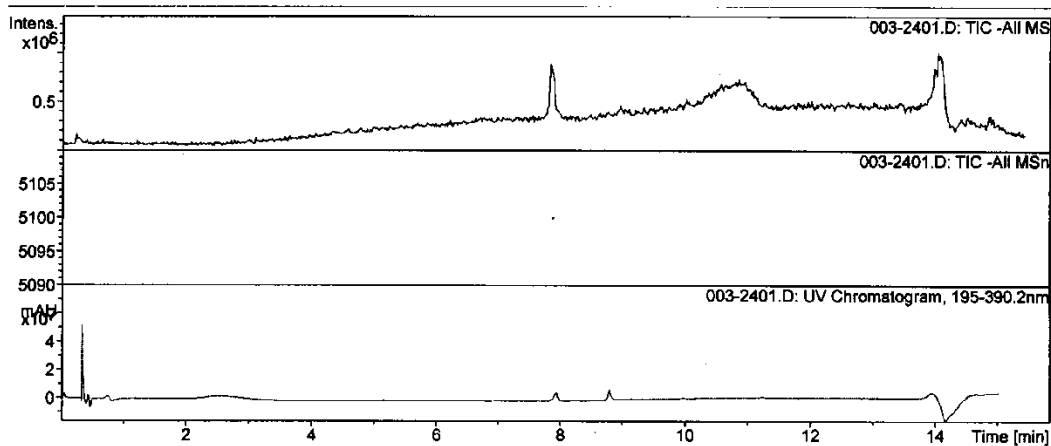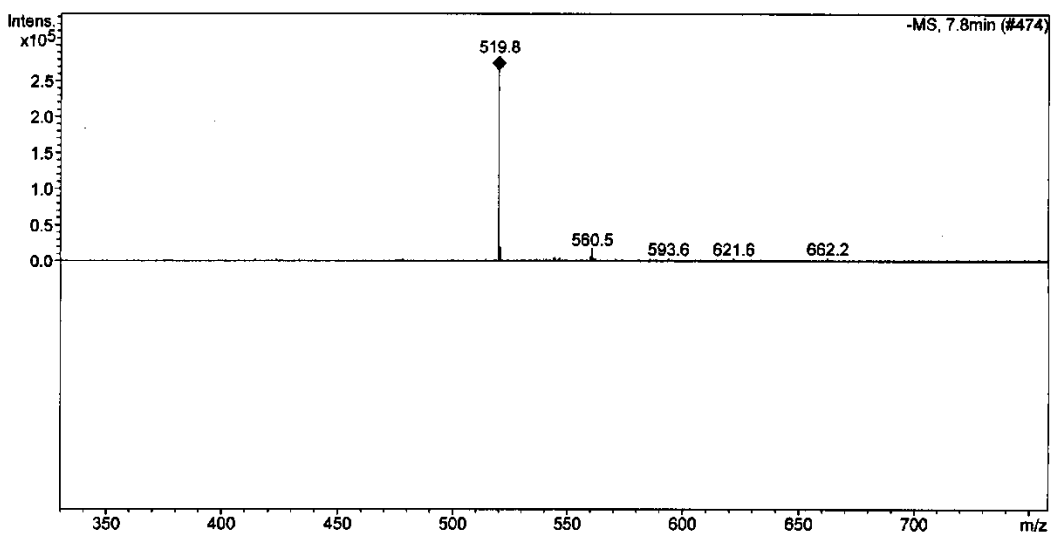

Figure S70. HRESI(-)MS spectrum of horipenoid H (8)

Elemental Composition Report

Single Mass Analysis

Tolerance = 5.0 PPM / DBE: min = -1.5, max = 50.0  
 Element prediction: Off  
 Number of isotope peaks used for i-FIT = 3

Monoisotopic Mass, Even Electron Ions

121 formula(e) evaluated with 1 results within limits (up to 50 best isotopic matches for each mass)

Elements Used:

C: 10-80 H: 1-110 O: 0-30

EHC2-7221

LCT PXE KE324

09-Mar-2012

14:56:45

1: TOF MS ES-

4.01e+004

EHC2-7221\_20120309 8 (0.158) AM2 (Ar,10000.0,0.00,1.00); ABS; Cm (5:29)

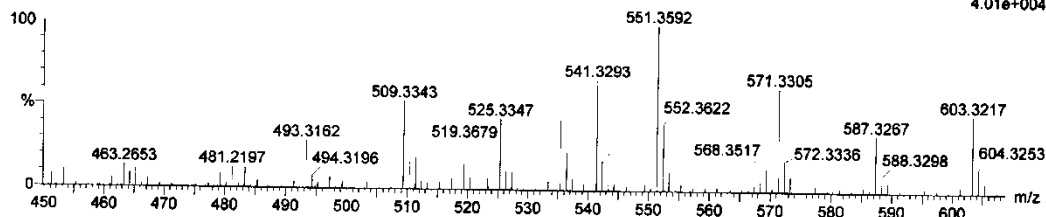

Minimum:

Maximum:

5.0      5.0      -1.5  
 50.0

| Mass | Calc. Mass | mDa | PEM | DBE | i-FIT | i-FIT (Norm) | Formula |
|------|------------|-----|-----|-----|-------|--------------|---------|
|------|------------|-----|-----|-----|-------|--------------|---------|

|          |          |      |      |     |       |     |            |
|----------|----------|------|------|-----|-------|-----|------------|
| 519.3679 | 519.3686 | -0.7 | -1.3 | 6.5 | 108.8 | 0.0 | C31 H51 O6 |
|----------|----------|------|------|-----|-------|-----|------------|

?

Figure S71. IR spectrum of horipenoid H (8)

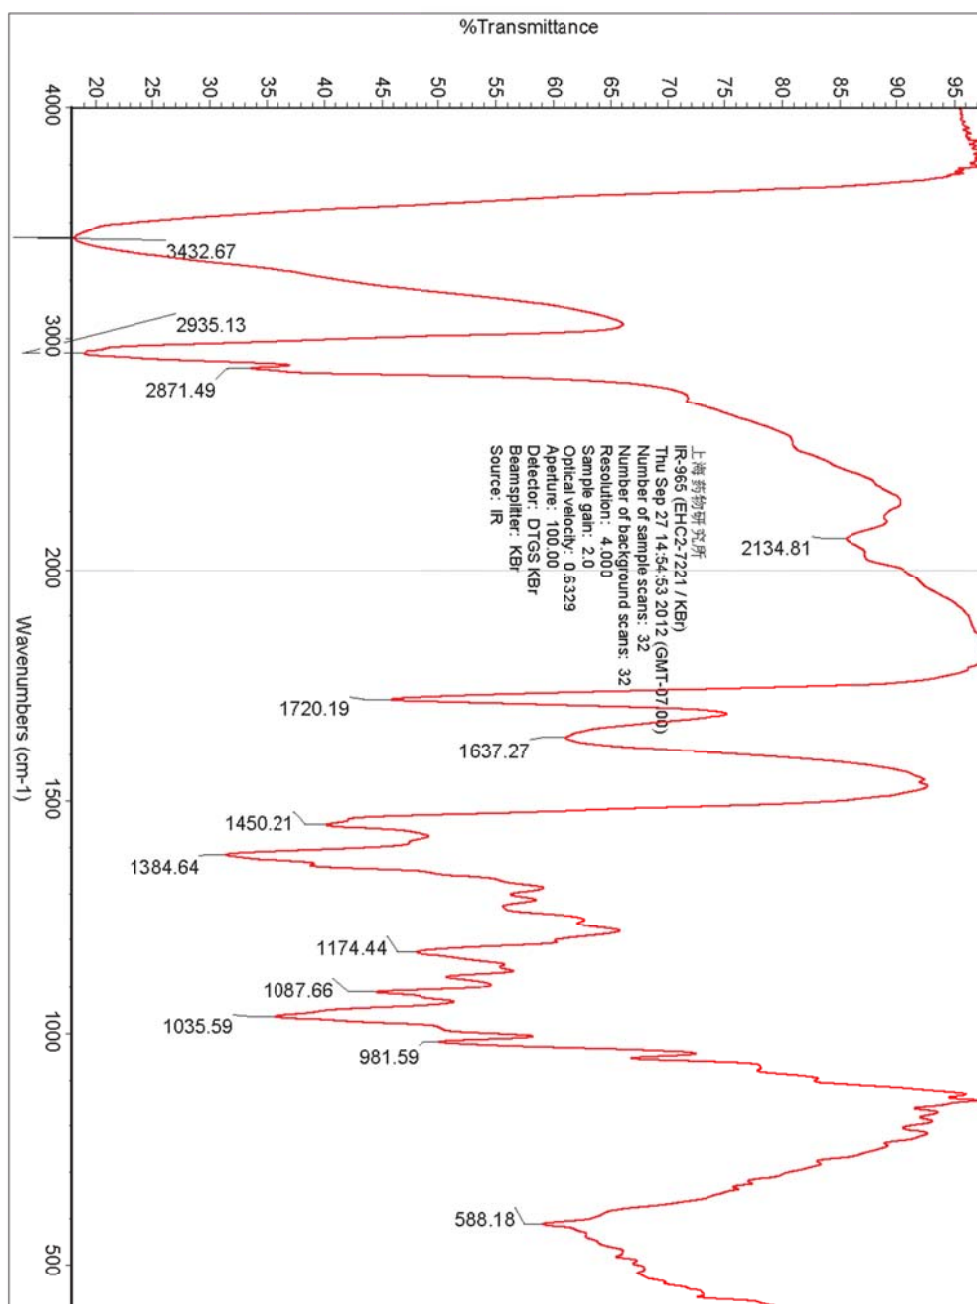

Supplement: c4ob00807c1.pdf [file c4ob00807c1.pdf]
